# Supplementary material for: Comparative transcriptome analysis of peripheral blood mononuclear cells in hepatitis B-related acute-on-chronic liver failure
Source: PubMed Central journal article supplement (PMC4748289; doi:10.1038/srep20759), 2016-02-10
Supplement: srep20759-s1.pdf [file srep20759-s1.pdf]

**Comparative transcriptome analysis of peripheral blood mononuclear cells in hepatitis B-related acute-on-chronic liver failure**

Qian Zhou, Wenchao Ding, Longyan Jiang, Jiaojiao Xin, Tianzhou Wu, Dongyan Shi, Jing Jiang, Hongcui Cao, Lanjuan Li, Jun Li

**Contents**

Supplemental Table S1.

Supplemental Table S2.

Supplemental Table S4.

Supplemental Table S5.

*Supplemental Table S1.* The clinical characteristics of the patients in the sequencing group.

| Patients  | Age (years) | Sex (F/M) | ALB (g/L) | ALT (U/L) | AST (U/L) | TB ( $\mu\text{mol/L}$ ) | Cr ( $\mu\text{mol/L}$ ) | Sodium ( $\mu\text{mol/L}$ ) | INR  | HBV-DNA log <sub>10</sub> (IU/ml) | MELD  |
|-----------|-------------|-----------|-----------|-----------|-----------|--------------------------|--------------------------|------------------------------|------|-----------------------------------|-------|
| Healthy-1 | 26          | F         | 54.1      | 13        | 19        | 12                       | 40                       | 139                          | 1.05 | NA                                | 5.64  |
| Healthy-2 | 28          | F         | 48.3      | 21        | 16        | 14                       | 46                       | 140                          | 1.11 | NA                                | 6.84  |
| Healthy-3 | 29          | F         | 47.2      | 12        | 15        | 9                        | 56                       | 139                          | NA   | NA                                | NA    |
| Healthy-4 | 42          | M         | 48.4      | 17        | 19        | 10                       | 97                       | 141                          | NA   | NA                                | NA    |
| CHB-1     | 51          | M         | 46.4      | 28        | 26        | 18                       | 73                       | 141                          | 1.13 | 7.10                              | 7.99  |
| CHB-2     | 41          | M         | 45.6      | 15        | 26        | 19                       | 106                      | 140                          | 1.02 | 4.27                              | 8.78  |
| CHB-3     | 39          | M         | 47.2      | 37        | 23        | 13                       | 49                       | 143                          | 0.96 | 5.86                              | 4.94  |
| CHB-4     | 32          | M         | 44.2      | 25        | 21        | 8                        | 91                       | 142                          | 1.3  | 5.80                              | 6.76  |
| ACLF-1    | 48          | M         | 38.4      | 94        | 112       | 511                      | 67                       | 133                          | 1.36 | 6.44                              | 22.72 |
| ACLF-2    | 54          | M         | 35.1      | 44        | 55        | 314                      | 42                       | 138                          | 1.41 | 5.12                              | 21.28 |
| ACLF-3    | 28          | M         | 31.6      | 68        | 128       | 630                      | 14                       | 132                          | 1.71 | 7.33                              | 26.07 |
| ACLF-4    | 34          | M         | 30.5      | 72        | 126       | 662                      | 59                       | 132                          | 1.95 | 4.61                              | 27.73 |

Supplemental Table S2. The clinical characteristics of the patients in the validation group.

| Patients   | Age (years) | Sex (F/M) | ALB (g/L) | ALT (U/L) | AST (U/L) | TB ( $\mu\text{mol/L}$ ) | Cr ( $\mu\text{mol/L}$ ) | Sodium ( $\mu\text{mol/L}$ ) | INR  | HBV-DNA log <sub>10</sub> (IU/ml) | MELD |
|------------|-------------|-----------|-----------|-----------|-----------|--------------------------|--------------------------|------------------------------|------|-----------------------------------|------|
| Healthy-5  | 34          | M         | 48.1      | 47        | 26        | 79                       | 11                       | NA                           | NA   | NA                                | NA   |
| Healthy-6  | 30          | F         | 47.2      | 12        | 15        | 9                        | 56                       | 139                          | NA   | NA                                | NA   |
| Healthy-7  | 27          | F         | 40.9      | 6         | 12        | 8                        | 56                       | 142                          | NA   | NA                                | NA   |
| Healthy-8  | 27          | F         | 48.5      | 9         | 16        | 10                       | 67                       | 139                          | NA   | NA                                | NA   |
| Healthy-9  | 31          | F         | 47.5      | 11        | 15        | 20                       | 68                       | 140                          | NA   | NA                                | NA   |
| Healthy-10 | 29          | M         | 47.7      | 15        | 16        | 7                        | 77                       | 140                          | NA   | NA                                | NA   |
| Healthy-11 | 27          | F         | 49.6      | 9         | NA        | 10                       | 60                       | NA                           | NA   | NA                                | NA   |
| Healthy-12 | 32          | F         | 44.5      | 10        | 16        | 6                        | 48                       | 138                          | NA   | NA                                | NA   |
| Healthy-13 | 33          | F         | 49.0      | 12        | 15        | 17                       | 66                       | 139                          | NA   | NA                                | NA   |
| Healthy-14 | 20          | M         | 46.5      | 20        | 19        | 29                       | 41                       | 138                          | NA   | NA                                | NA   |
| Healthy-15 | 26          | M         | 49.7      | 7         | 14        | 23                       | 80                       | 140                          | NA   | NA                                | NA   |
| Healthy-16 | 30          | M         | 45.6      | 13        | 19        | 15                       | 70                       | 141                          | NA   | NA                                | NA   |
| Healthy-17 | 27          | F         | 49.8      | 11        | 19        | 14                       | 50                       | 140                          | NA   | NA                                | NA   |
| Healthy-18 | 25          | F         | 44.3      | 10        | 14        | 6                        | 52                       | 139                          | NA   | NA                                | NA   |
| Healthy-19 | 27          | M         | 48.6      | 17        | 18        | 6                        | 78                       | 139                          | NA   | NA                                | NA   |
| Healthy-20 | 24          | M         | 49.0      | 23        | 18        | 23                       | 65                       | 139                          | NA   | NA                                | NA   |
| Healthy-21 | 33          | M         | 49.0      | 14        | 19        | 22                       | 81                       | 141                          | NA   | NA                                | NA   |
| Healthy-22 | 31          | M         | 51.6      | 29        | NA        | 40                       | 85                       | NA                           | NA   | NA                                | NA   |
| Healthy-23 | 30          | M         | 49.9      | 12        | NA        | 10                       | 94                       | NA                           | NA   | NA                                | NA   |
| Healthy-24 | 27          | F         | 45.5      | 6         | 12        | 12                       | 46                       | 140                          | NA   | NA                                | NA   |
| CHB-5      | 65          | F         | 47.5      | 45        | 29        | 13                       | 54                       | 140                          | 0.91 | 5.90                              | 4.34 |
| CHB-6      | 69          | F         | 49.2      | 23        | 37        | 29                       | 66                       | 146                          | 1.05 | 7.45                              | 8.97 |
| CHB-7      | 48          | M         | 48.1      | 22        | 21        | 20                       | 70                       | 141                          | 1.01 | 6.79                              | 7.13 |

|             |    |   |      |      |     |     |     |     |      |      |       |
|-------------|----|---|------|------|-----|-----|-----|-----|------|------|-------|
| CHB-8       | 41 | M | 48.8 | 36   | 23  | 19  | 70  | 139 | 0.98 | 5.03 | 6.60  |
| CHB-9       | 40 | M | 49.2 | 19   | 18  | 21  | 75  | 140 | 1.06 | 8.11 | 7.86  |
| CHB-10      | 59 | F | 45.5 | 20   | 27  | 23  | 56  | 142 | 1.04 | 8.32 | 7.99  |
| CHB-11      | 39 | M | 50.2 | 33   | 27  | 17  | 85  | 142 | 1.00 | 5.63 | 6.41  |
| CHB-12      | 33 | F | 49.6 | 14   | 23  | 9   | 55  | 140 | 0.95 | 6.15 | 3.43  |
| CHB-13      | 35 | F | 50.9 | 26   | 23  | 7   | 46  | 140 | 0.93 | 7.00 | 2.24  |
| CHB-14      | 33 | M | 52.4 | 37   | 28  | 17  | 79  | 141 | 0.97 | 6.79 | 6.07  |
| CHB-15      | 36 | M | 50.0 | 24   | 21  | 26  | 91  | 140 | 0.92 | 7.62 | 7.35  |
| CHB-16      | 32 | M | 45.9 | 19   | 17  | 21  | 66  | 138 | 0.94 | 8.38 | 6.51  |
| CHB-17      | 37 | F | 49.2 | 74   | 45  | 13  | 45  | 141 | 1.01 | 8.71 | 5.51  |
| CHB-18      | 40 | F | 46.2 | 27   | 28  | 5   | 56  | 140 | 0.93 | 7.48 | 0.97  |
| CHB-19      | 41 | M | 50.0 | 20   | 24  | 12  | 78  | 141 | 0.88 | 8.37 | 3.66  |
| CHB-20      | 44 | M | 51.0 | 9    | 21  | 8   | 70  | 142 | 0.93 | 8.03 | 2.75  |
| CHB-21      | 31 | M | 50.0 | 28   | 24  | 19  | 61  | 142 | 0.97 | 9.61 | 6.49  |
| CHB-22      | 31 | F | 47.0 | 56   | 71  | 15  | 47  | 140 | 0.94 | 5.63 | 5.24  |
| CHB-23      | 40 | M | 53.0 | 24   | 20  | 19  | 79  | 142 | 1.02 | 6.17 | 7.05  |
| CHB-24      | 31 | M | 52.1 | 15   | 19  | 27  | 61  | 141 | 0.95 | 8.61 | 7.58  |
| HBV-ACLF-5  | 60 | F | 22.9 | 462  | 562 | 302 | 107 | 138 | 2.65 | 5.00 | 30.02 |
| HBV-ACLF-6  | 30 | M | 36.4 | 544  | 460 | 492 | 59  | 136 | 1.68 | 6.58 | 24.94 |
| HBV-ACLF-7  | 41 | M | 30.8 | 71   | 58  | 360 | 67  | 135 | 1.90 | NA   | 25.14 |
| HBV-ACLF-8  | 47 | M | 36.1 | 452  | 515 | 273 | 59  | 136 | 2.16 | 6.43 | 25.53 |
| HBV-ACLF-9  | 47 | M | 28.8 | 104  | 145 | 256 | 71  | 130 | 2.09 | 5.88 | 24.92 |
| HBV-ACLF-10 | 36 | M | 29.8 | 85   | 88  | 478 | 45  | 135 | 1.90 | 6.47 | 26.21 |
| HBV-ACLF-11 | 35 | M | 38.6 | 470  | 170 | 336 | 66  | 140 | 1.74 | 5.12 | 23.89 |
| HBV-ACLF-12 | 39 | M | 31.6 | 1105 | 664 | 366 | 62  | 134 | 2.26 | 4.21 | 27.14 |
| HBV-ACLF-13 | 52 | M | 36.3 | 244  | 188 | 646 | 100 | 132 | 1.66 | 6.08 | 27.00 |
| HBV-ACLF-14 | 58 | F | 28.1 | 521  | 441 | 200 | 58  | 140 | 1.90 | 5.77 | 22.91 |
| HBV-ACLF-15 | 47 | F | 26.9 | 331  | 910 | 350 | 47  | 139 | 2.25 | 4.27 | 26.92 |

|             |    |   |      |     |     |     |     |     |      |      |       |
|-------------|----|---|------|-----|-----|-----|-----|-----|------|------|-------|
| HBV-ACLF-16 | 30 | M | 30.5 | 100 | 131 | 451 | 80  | 135 | 2.73 | 6.45 | 30.05 |
| HBV-ACLF-17 | 54 | M | 29.5 | 41  | 71  | 283 | 113 | 140 | 1.55 | NA   | 24.29 |
| HBV-ACLF-18 | 57 | M | 34.1 | 633 | 432 | 381 | 69  | 137 | 2.42 | 5.81 | 28.06 |
| HBV-ACLF-19 | 45 | F | 28.4 | 311 | 266 | 290 | 51  | 135 | 1.93 | 9.18 | 24.49 |
| HBV-ACLF-20 | 43 | M | 27.2 | 372 | 157 | 278 | 51  | 140 | 2.72 | 4.53 | 28.18 |
| HBV-ACLF-21 | 60 | M | 29.2 | 95  | 101 | 405 | 61  | 139 | 1.84 | 3.91 | 25.22 |
| HBV-ACLF-22 | 34 | M | 26.3 | 894 | 704 | 275 | 51  | 139 | 1.64 | 6.93 | 22.47 |
| HBV-ACLF-23 | 39 | M | 28.8 | 660 | 280 | 302 | 79  | 143 | 2.07 | 5.29 | 25.43 |
| HBV-ACLF-24 | 46 | M | 36.6 | 302 | 224 | 512 | 122 | 138 | 2.67 | 3.72 | 33.35 |

---

*Supplemental Table S3. List of the 2381 differentially expressed genes.*

| Gene ID     | Gene short name     | Locus               |
|-------------|---------------------|---------------------|
| XLOC_000006 | CICP27              | 1:89294-174387      |
| XLOC_000031 | ISG15               | 1:1001137-1014541   |
| XLOC_000065 | PRKCZ               | 1:2050425-2220738   |
| XLOC_000067 | SKI                 | 1:2228616-2310262   |
| XLOC_000070 | PLCH2               | 1:2415550-2526616   |
| XLOC_000112 | VAMP3               | 1:7771268-7781434   |
| XLOC_000145 | NMNAT1,RP11-807G9.2 | 1:9922112-9989842   |
| XLOC_000148 | RBP7                | 1:9997205-10016020  |
| XLOC_000155 | PGD                 | 1:10210521-10420144 |
| XLOC_000170 | UBIAD1              | 1:11273168-11299536 |
| XLOC_000173 | FBXO44              | 1:11648333-11663334 |
| XLOC_000175 | DRAXIN              | 1:11691728-11725857 |
| XLOC_000185 | TNFRSF8             | 1:12063376-12144233 |
| XLOC_000186 | MIR7846,TNFRSF1B    | 1:12166729-12211765 |
| XLOC_000266 | PADI4               | 1:17308160-17364027 |
| XLOC_000292 | OTUD3               | 1:19882393-19912945 |
| XLOC_000302 | CDA                 | 1:20588947-20618908 |
| XLOC_000314 | NBPF3               | 1:21440080-21485005 |
| XLOC_000315 | ALPL                | 1:21509371-21578412 |
| XLOC_000331 | ZBTB40              | 1:22451839-22531157 |
| XLOC_000363 | RCAN3               | 1:24501300-24556024 |
| XLOC_000367 | CLIC4               | 1:24745356-24844324 |
| XLOC_000368 | -                   | 1:24857274-24877676 |
| XLOC_000379 | LDLRAP1             | 1:25543579-25575359 |
| XLOC_000381 | MAN1C1              | 1:25616798-25788649 |
| XLOC_000425 | SYTL1               | 1:27341615-27367169 |
| XLOC_000431 | FGR                 | 1:27610572-27636267 |
| XLOC_000438 | RNU6-1245P,STX12    | 1:27773182-27824795 |
| XLOC_000444 | THEMIS2             | 1:27872511-27914820 |
| XLOC_000448 | -                   | 1:28143209-28146654 |
| XLOC_000470 | EPB41               | 1:28886974-29123935 |
| XLOC_000489 | SERINC2             | 1:31409564-31434733 |
| XLOC_000505 | LCK                 | 1:32251238-32286167 |
| XLOC_000550 | AGO4                | 1:35807598-35857893 |
| XLOC_000566 | MIR6732,ZC3H12A     | 1:37454878-37484448 |
| XLOC_000623 | EXO5                | 1:40477204-40517940 |
| XLOC_000652 | PPIH,RP5-994D16.3   | 1:42658246-42681659 |
| XLOC_000691 | BTBD19,PLK3         | 1:44799735-44843063 |
| XLOC_000715 | FAAHP1              | 1:46423580-46446216 |
| XLOC_000791 | GPX7                | 1:52602371-52609294 |
| XLOC_000803 | PODN                | 1:53062051-53085807 |
| XLOC_000830 | C1orf177,DHCR24     | 1:54775925-54888850 |
| XLOC_000908 | LEPR,LEPROT         | 1:65420586-65641559 |
| XLOC_000910 | PDE4B               | 1:65792513-66374646 |
| XLOC_000914 | TCTEX1D1            | 1:66752213-66779320 |
| XLOC_000920 | IL12RB2             | 1:67307139-67402722 |
| XLOC_000925 | GADD45A             | 1:67685060-67688338 |
| XLOC_000996 | PTGFR               | 1:78229598-78539749 |

|             |                                               |                       |
|-------------|-----------------------------------------------|-----------------------|
| XLOC_001020 | PRKACB                                        | 1:84076330-84238498   |
| XLOC_001160 | CDC14A                                        | 1:100351733-100520277 |
| XLOC_001169 | RP4-575N6.5,S1PR1                             | 1:101228673-101271365 |
| XLOC_001208 | GPSM2                                         | 1:108815897-108963501 |
| XLOC_001217 | CELSR2                                        | 1:109249661-109275750 |
| XLOC_001220 | CYB561D1                                      | 1:109494046-109502932 |
| XLOC_001223 | GSTM1,GSTM2,GSTM4                             | 1:109656044-109709551 |
| XLOC_001304 | SLC22A15                                      | 1:115976264-116072734 |
| XLOC_001312 | CD2                                           | 1:116754384-116769448 |
| XLOC_001356 | LINC00869                                     | 1:120911312-121052167 |
| XLOC_001358 | FCGR1B                                        | 1:121087198-121146826 |
| XLOC_001379 | FCGR1C,RP5-998N21.4                           | 1:143874710-143934776 |
| XLOC_001467 | LINC00869,PPIAL4C,RP11-353N4.6                | 1:149558468-149747812 |
| XLOC_001471 | FCGR1A                                        | 1:149782661-149813681 |
| XLOC_001521 | SNX27                                         | 1:151611830-151699091 |
| XLOC_001529 | AL450992.2                                    | 1:151836991-151856355 |
| XLOC_001569 | S100A9                                        | 1:153357673-153361500 |
| XLOC_001595 | ATP8B2                                        | 1:154325534-154351307 |
| XLOC_001597 | IL6R                                          | 1:154402327-154469552 |
| XLOC_001609 | ZBTB7B                                        | 1:155002629-155062775 |
| XLOC_001641 | SEMA4A                                        | 1:156147365-156182765 |
| XLOC_001661 | RP11-71G12.1                                  | 1:157177231-157194419 |
| XLOC_001663 | -                                             | 1:157400269-157419422 |
| XLOC_001675 | CD1D                                          | 1:158164104-158186416 |
| XLOC_001688 | MNDA                                          | 1:158830915-158850176 |
| XLOC_001694 | FCER1A                                        | 1:159283854-159308224 |
| XLOC_001706 | FCRL6                                         | 1:159800326-159820258 |
| XLOC_001725 | SLAMF7                                        | 1:160739056-160758210 |
| XLOC_001742 | FCER1G,MIR5187,NDUFS2,TOMM40L                 | 1:161166387-161238302 |
| XLOC_001749 | FCGR2A,FCGR2B,FCGR2C,HSPA6,HSPA7,RP11-25K21.6 | 1:161505265-161678933 |
| XLOC_001756 | ATF6                                          | 1:161766292-161975996 |
| XLOC_001759 | C1orf226,NOS1AP,RP11-565P22.6                 | 1:162069773-162386818 |
| XLOC_001765 | UAP1                                          | 1:162561505-162600010 |
| XLOC_001822 | CD247                                         | 1:167430530-167518610 |
| XLOC_001840 | XCL1                                          | 1:168576099-168582077 |
| XLOC_001884 | FASLG                                         | 1:172658990-172670744 |
| XLOC_001956 | QSOX1                                         | 1:180154808-180204030 |
| XLOC_001985 | NPL                                           | 1:182789292-182887847 |
| XLOC_001987 | LAMC1                                         | 1:183023353-183145592 |
| XLOC_001992 | RGL1                                          | 1:183636084-183928531 |
| XLOC_001998 | C1orf21                                       | 1:184387007-184639044 |
| XLOC_002021 | PLA2G4A                                       | 1:186828952-186989026 |
| XLOC_002042 | RGS18                                         | 1:192158362-192390374 |
| XLOC_002046 | RGS1                                          | 1:192575726-192580031 |
| XLOC_002047 | RGS2                                          | 1:192590119-192812419 |
| XLOC_002099 | GPR25                                         | 1:200872917-200874930 |
| XLOC_002100 | C1orf106                                      | 1:200891047-200915735 |
| XLOC_002128 | LGR6                                          | 1:202146925-202321648 |

|             |                                        |                             |
|-------------|----------------------------------------|-----------------------------|
| XLOC_002140 | PPFIA4                                 | 1:203026497-203078740       |
| XLOC_002144 | BTG2                                   | 1:203305419-203314770       |
| XLOC_002147 | ATP2B4                                 | 1:203626560-203744209       |
| XLOC_002149 | LAX1                                   | 1:203765128-203778286       |
| XLOC_002153 | SOX13                                  | 1:204073105-204127743       |
| XLOC_002186 | SRGAP2                                 | 1:206186178-206464443       |
| XLOC_002201 | PFKFB2                                 | 1:207006844-207099993       |
| XLOC_002206 | CD55                                   | 1:207321408-207375427       |
| XLOC_002209 | CR1                                    | 1:207496146-207641981       |
| XLOC_002223 | G0S2                                   | 1:209661363-209734950       |
| XLOC_002226 | TRAF3IP3                               | 1:209756014-209784665       |
| XLOC_002256 | ATF3                                   | 1:212565333-212621656       |
| XLOC_002305 |                                        | 1-Mar 1:220786697-220820577 |
| XLOC_002308 | HLX                                    | 1:220832737-220885225       |
| XLOC_002329 | DEGS1                                  | 1:224175755-224199330       |
| XLOC_002347 | H3F3A                                  | 1:226053757-226072001       |
| XLOC_002373 | ARF1,MIR3620                           | 1:228082659-228099216       |
| XLOC_002380 | OBSCN                                  | 1:228164085-228378876       |
| XLOC_002388 | FTH1P2                                 | 1:228687414-228687826       |
| XLOC_002389 | RHOA                                   | 1:228735076-228746669       |
| XLOC_002535 | CNST                                   | 1:246566443-246668584       |
| XLOC_002539 | SCCPDH                                 | 1:246723926-246768311       |
| XLOC_002552 | NLRP3                                  | 1:247415874-247747062       |
| XLOC_002600 | LYPD8                                  | 1:248718648-248808520       |
| XLOC_002635 | HES4                                   | 1:998884-1000172            |
| XLOC_002723 | GPR153                                 | 1:6247102-6260975           |
| XLOC_002729 | PLEKHG5,TNFRSF25                       | 1:6424787-6520061           |
| XLOC_002763 | SLC2A5                                 | 1:9035106-9094228           |
| XLOC_002810 | DHRS3                                  | 1:12567909-12618274         |
| XLOC_002866 | ARHGEF19                               | 1:16197853-16212609         |
| XLOC_002892 | PADI2                                  | 1:17066760-17119435         |
| XLOC_002894 | PADI4                                  | 1:17308160-17364027         |
| XLOC_002898 | ALDH4A1,IFFO2,RP13-279N23.2,T<br>AS1R2 | 1:18839598-18956686         |
| XLOC_002930 | ECE1                                   | 1:21217164-21345504         |
| XLOC_002932 | NBPF2P                                 | 1:21423112-21427967         |
| XLOC_002958 | TCEA3                                  | 1:23380935-23424769         |
| XLOC_002960 | E2F2                                   | 1:23506429-23531336         |
| XLOC_002983 | RUNX3                                  | 1:24899266-24965121         |
| XLOC_002997 | -                                      | 1:25597317-25601523         |
| XLOC_003004 | PAFAH2                                 | 1:25959632-25998157         |
| XLOC_003011 | ZNF683                                 | 1:26361633-26374522         |
| XLOC_003038 | AHDC1                                  | 1:27522543-27604431         |
| XLOC_003039 | FGR                                    | 1:27610572-27636267         |
| XLOC_003081 | LAPTM5                                 | 1:30732422-30757820         |
| XLOC_003084 | SDC3                                   | 1:30869466-30908761         |
| XLOC_003112 | LCK                                    | 1:32251238-32286167         |
| XLOC_003126 | RNF19B                                 | 1:32928313-32965070         |
| XLOC_003130 | A3GALT2,PHC2                           | 1:33306765-33431075         |
| XLOC_003153 | CLSPN                                  | 1:35720217-35769967         |



|             |                           |                       |
|-------------|---------------------------|-----------------------|
| XLOC_003160 | COL8A2                    | 1:36095235-36125708   |
| XLOC_003168 | CSF3R,MRPS15              | 1:36455717-36483316   |
| XLOC_003183 | MTF1,YRDC                 | 1:37793801-37859625   |
| XLOC_003203 | HPCAL4                    | 1:39678179-39691689   |
| XLOC_003225 | RIMS3                     | 1:40620678-40665705   |
| XLOC_003227 | CITED4                    | 1:40861050-40862366   |
| XLOC_003233 | -                         | 1:41302917-41305970   |
| XLOC_003251 | SLC2A1                    | 1:42925380-42958914   |
| XLOC_003335 | SPATA6                    | 1:48295371-48472223   |
| XLOC_003365 | ORC1                      | 1:52372637-52404459   |
| XLOC_003372 | ECHDC2                    | 1:52895909-53051703   |
| XLOC_003379 | SLC1A7                    | 1:53087178-53142632   |
| XLOC_003399 | SSBP3                     | 1:54133073-54413479   |
| XLOC_003404 | TTC22                     | 1:54775925-54888850   |
| XLOC_003433 | JUN                       | 1:58780079-58784982   |
| XLOC_003480 | JAK1                      | 1:64745094-64966603   |
| XLOC_003606 | GNG5                      | 1:84479258-84575307   |
| XLOC_003607 | CTBS                      | 1:84479258-84575307   |
| XLOC_003625 | MIR7856,ODF2L             | 1:86346662-86396342   |
| XLOC_003649 | GBP5                      | 1:89256194-89274237   |
| XLOC_003666 | TGFBR3                    | 1:91680342-91906335   |
| XLOC_003677 | EVI5                      | 1:92508695-92792404   |
| XLOC_003707 | ARHGAP29                  | 1:94148987-94275068   |
| XLOC_003729 | RPL7P9                    | 1:96678873-96679620   |
| XLOC_003735 | DPYD                      | 1:97077742-97921049   |
| XLOC_003785 | SLC25A24                  | 1:108128493-108202743 |
| XLOC_003803 | PSRC1                     | 1:109279555-109283186 |
| XLOC_003805 | SORT1                     | 1:109309319-109397976 |
| XLOC_003807 | AMIGO1                    | 1:109503935-109509748 |
| XLOC_003829 | KCNA3                     | 1:110653559-110692458 |
| XLOC_003856 | PPM1J,RHOC,RP11-426L16.10 | 1:112673140-112715477 |
| XLOC_003867 | BCL2L15                   | 1:113761741-113914086 |
| XLOC_003900 | CD2                       | 1:116754384-116769448 |
| XLOC_003901 | FTH1P22                   | 1:116772953-116806447 |
| XLOC_003935 | ZNF697                    | 1:119618979-119648246 |
| XLOC_003940 | NOTCH2,RP5-1042I8.7       | 1:119909254-120070143 |
| XLOC_004075 | OTUD7B                    | 1:149937811-150010744 |
| XLOC_004091 | CTSS                      | 1:150724759-150776403 |
| XLOC_004118 | LINGO4,RORC               | 1:151800263-151831872 |
| XLOC_004121 | THEM4                     | 1:151870473-151909838 |
| XLOC_004124 | S100A11                   | 1:151994530-152047907 |
| XLOC_004139 | IVL                       | 1:152897539-152913104 |
| XLOC_004152 | S100A12                   | 1:153373705-153375649 |
| XLOC_004154 | S100A8                    | 1:153390031-153391188 |
| XLOC_004160 | S100A6                    | 1:153531100-153536608 |
| XLOC_004181 | RAB13                     | 1:153981616-153986375 |
| XLOC_004202 | PBXIP1                    | 1:154944062-154956526 |
| XLOC_004211 | GBA                       | 1:155230974-155244699 |
| XLOC_004225 | RIT1                      | 1:155897807-155911968 |
| XLOC_004242 | IQGAP3                    | 1:156525404-156572604 |

|             |                                       |                       |
|-------------|---------------------------------------|-----------------------|
| XLOC_004257 | ARHGEF11                              | 1:156934839-157045877 |
| XLOC_004265 | FCRL5                                 | 1:157512438-157552523 |
| XLOC_004269 | FCRL3                                 | 1:157673990-157700964 |
| XLOC_004309 | FCRL6                                 | 1:159800326-159820258 |
| XLOC_004319 | IGSF8                                 | 1:160091339-160098943 |
| XLOC_004326 | SLAMF6                                | 1:160485029-160523370 |
| XLOC_004328 | SLAMF1                                | 1:160608099-160647328 |
| XLOC_004363 | SH2D1B                                | 1:162394698-162412145 |
| XLOC_004393 | GPA33                                 | 1:167049624-167090642 |
| XLOC_004397 | CD247                                 | 1:167430530-167518610 |
| XLOC_004400 | CREG1                                 | 1:167528867-167553767 |
| XLOC_004413 | XCL2                                  | 1:168540764-168544299 |
| XLOC_004423 | F5                                    | 1:169511804-169586588 |
| XLOC_004429 | KIFAP3                                | 1:169921260-170085208 |
| XLOC_004500 | RP11-568K15.1,RP4-798P15.3,SEC1<br>6B | 1:177923955-178038007 |
| XLOC_004545 | GLUL                                  | 1:182379109-182392316 |
| XLOC_004564 | NCF2                                  | 1:183460873-183598246 |
| XLOC_004566 | ARPC5                                 | 1:183620845-183635977 |
| XLOC_004571 | COLGALT2                              | 1:183929853-184037753 |
| XLOC_004574 | EDEM3                                 | 1:184690230-184754913 |
| XLOC_004594 | PTGS2                                 | 1:186671790-186681446 |
| XLOC_004646 | -                                     | 1:198473268-198519872 |
| XLOC_004666 | KIF21B                                | 1:200966955-201023741 |
| XLOC_004682 | ARL8A                                 | 1:202122857-202144743 |
| XLOC_004697 | ADIPOR1                               | 1:202940635-202958572 |
| XLOC_004705 | CHI3L1                                | 1:203178611-203186768 |
| XLOC_004706 | CHIT1                                 | 1:203212826-203274841 |
| XLOC_004721 | ETNK2                                 | 1:204131061-204152003 |
| XLOC_004746 | RAB29                                 | 1:205766489-205775713 |
| XLOC_004747 | SLC41A1                               | 1:205788911-205813862 |
| XLOC_004765 | IL10                                  | 1:206767601-206772494 |
| XLOC_004766 | FAIM3                                 | 1:206885139-206923247 |
| XLOC_004785 | PLXNA2                                | 1:208022241-208244320 |
| XLOC_004810 | SLC30A1                               | 1:211571567-211578742 |
| XLOC_004818 | LPGAT1                                | 1:211743450-211853703 |
| XLOC_004898 | TLR5                                  | 1:223105313-223143304 |
| XLOC_004918 | LBR                                   | 1:225401494-225428925 |
| XLOC_004922 | RP11-285F7.2,TMEM63A                  | 1:225810091-225883467 |
| XLOC_004932 | PARP1                                 | 1:226360690-226408075 |
| XLOC_004935 | ITPKB                                 | 1:226631624-226739358 |
| XLOC_004992 | -                                     | 1:228929960-228949736 |
| XLOC_005033 | PCNXL2,RP5-862P8.3                    | 1:232950577-233295762 |
| XLOC_005061 | LYST                                  | 1:235660946-235883640 |
| XLOC_005083 | CHRM3-AS2                             | 1:239386564-239916955 |
| XLOC_005115 | CEP170                                | 1:243124427-243851925 |
| XLOC_005190 | ZNF692                                | 1:248850005-248864796 |
| XLOC_005255 | -                                     | 1:84579326-84582446   |
| XLOC_005281 | -                                     | 1:108088837-108090942 |
| XLOC_005282 | -                                     | 1:108091165-108100971 |

|             |                                                                                 |                        |
|-------------|---------------------------------------------------------------------------------|------------------------|
| XLOC_005465 | ZMYND11                                                                         | 10:134464-254637       |
| XLOC_005504 | AKR1C1,AKR1C3,RP11-49907.4                                                      | 10:4922563-5135226     |
| XLOC_005522 | PFKFB3                                                                          | 10:6144895-6335982     |
| XLOC_005527 | PRKCQ-AS1,RP11-554I8.1                                                          | 10:6426923-6842906     |
| XLOC_005538 | GATA3                                                                           | 10:8053603-8075207     |
| XLOC_005559 | ECHDC3                                                                          | 10:11742365-11764070   |
| XLOC_005570 | OPTN                                                                            | 10:12896624-13140333   |
| XLOC_005600 | VIM                                                                             | 10:17210905-17237835   |
| XLOC_005619 | PLXDC2                                                                          | 10:19816025-20289856   |
| XLOC_005652 | MSRB2                                                                           | 10:23095505-23122013   |
| XLOC_005659 | OTUD1                                                                           | 10:23438842-23444691   |
| XLOC_005674 | APBB1IP                                                                         | 10:26437896-26571485   |
| XLOC_005712 | MAP3K8                                                                          | 10:30433891-30461833   |
| XLOC_005713 | HNRNPA1P32                                                                      | 10:30509127-30537005   |
| XLOC_005720 | ZEB1                                                                            | 10:31187882-31529814   |
| XLOC_005808 | CSGALNACT2                                                                      | 10:43136823-43185308   |
| XLOC_005839 | ALOX5                                                                           | 10:45373889-45453121   |
| XLOC_005847 | -                                                                               | 10:46091013-46101937   |
| XLOC_005902 | ASAH2B                                                                          | 10:50739317-50885675   |
| XLOC_005929 | UBE2D1                                                                          | 10:58334974-58370753   |
| XLOC_005942 | CDK1                                                                            | 10:60778330-60794852   |
| XLOC_005950 | ZNF365                                                                          | 10:62374191-62672011   |
| XLOC_006005 | -                                                                               | 10:69047678-69072140   |
| XLOC_006006 | SRGN                                                                            | 10:69080533-69105263   |
| XLOC_006010 | HKDC1                                                                           | 10:69215332-69268148   |
| XLOC_006012 | TSPAN15                                                                         | 10:69451472-69507753   |
| XLOC_006015 | C10orf35                                                                        | 10:69630250-69633890   |
| XLOC_006018 | COL13A1                                                                         | 10:69801101-69964275   |
| XLOC_006039 | DDIT4                                                                           | 10:72273919-72276036   |
| XLOC_006046 | MCU                                                                             | 10:72692130-72887757   |
| XLOC_006074 | PLAU                                                                            | 10:73909176-73922777   |
| XLOC_006077 | ADK,MRPL35P3                                                                    | 10:74151184-74710090   |
| XLOC_006081 | KAT6B                                                                           | 10:74825143-75032622   |
| XLOC_006082 | SAMD8                                                                           | 10:75094431-75182123   |
| XLOC_006089 | C10orf11                                                                        | 10:75430570-76560994   |
| XLOC_006116 | PPIF                                                                            | 10:79347084-79576977   |
| XLOC_006155 | CDHR1                                                                           | 10:84194557-84219621   |
| XLOC_006158 | CCSER2                                                                          | 10:84328573-84518521   |
| XLOC_006197 | LIPN                                                                            | 10:88759976-88783646   |
| XLOC_006245 | CEP55                                                                           | 10:93496631-93529092   |
| XLOC_006255 | TBC1D12                                                                         | 10:94402250-94613905   |
| XLOC_006265 | C10orf131,CC2D2B,ENTPD1,RP11-248J23.6,RP11-248J23.7,RP11-429G19.3,RP11-690P14.4 | 10:95711778-96090238   |
| XLOC_006281 | FRAT1                                                                           | 10:97319266-97321915   |
| XLOC_006294 | GOLGA7B                                                                         | 10:97828477-98030828   |
| XLOC_006312 | SCD                                                                             | 10:100347101-100364834 |
| XLOC_006339 | ELOVL3                                                                          | 10:102226301-102229589 |
| XLOC_006370 | GSTO1,GSTO2                                                                     | 10:104235355-104304945 |
| XLOC_006406 | SHOC2                                                                           | 10:110919546-111013944 |

|             |                                           |                        |
|-------------|-------------------------------------------|------------------------|
| XLOC_006451 | ENO4                                      | 10:116828760-117126586 |
| XLOC_006469 | GRK5                                      | 10:119207588-119459880 |
| XLOC_006497 | PLEKHA1                                   | 10:122374526-122442602 |
| XLOC_006541 | PTPRE,RP11-4C20.4                         | 10:127907055-128085889 |
| XLOC_006572 | VENTX                                     | 10:133232153-133241953 |
| XLOC_006575 | CYP2E1,MTG1,PAOX,RP11-108K1<br>4.8,SCART1 | 10:133379233-133569835 |
| XLOC_006615 | DIP2C                                     | 10:273342-689743       |
| XLOC_006659 | GDI2                                      | 10:5684754-5842132     |
| XLOC_006669 | PRKCQ                                     | 10:6426923-6842906     |
| XLOC_006671 | SFMBT2                                    | 10:7158478-7411486     |
| XLOC_006738 | NMT2                                      | 10:15095384-15168717   |
| XLOC_006741 | FAM171A1                                  | 10:15211642-15371062   |
| XLOC_006751 | ST8SIA6                                   | 10:17315199-17455486   |
| XLOC_006830 | MPP7                                      | 10:28050992-28335264   |
| XLOC_006858 | SVILP1                                    | 10:30671565-30717266   |
| XLOC_006869 | KIF5B                                     | 10:32008876-32056439   |
| XLOC_006906 | NAMPTP1                                   | 10:36521720-36524234   |
| XLOC_006912 | RP11-258F22.1,ZNF248                      | 10:37775370-37860791   |
| XLOC_006981 | NCOA4                                     | 10:45825476-46030714   |
| XLOC_006983 | ANTXRLP1                                  | 10:46196813-46273557   |
| XLOC_007024 | C10orf128                                 | 10:49154409-49188585   |
| XLOC_007034 | SGMS1                                     | 10:50305585-50647252   |
| XLOC_007065 | IPMK                                      | 10:58191327-58267958   |
| XLOC_007074 | CCDC6                                     | 10:59788762-59907020   |
| XLOC_007076 | ANK3                                      | 10:60026297-60733705   |
| XLOC_007083 | RTKN2                                     | 10:62183034-62268707   |
| XLOC_007086 | EGR2                                      | 10:62811995-62919900   |
| XLOC_007139 | AIFM2,TYSND1                              | 10:70052795-70146847   |
| XLOC_007148 | PRF1                                      | 10:70478820-70881173   |
| XLOC_007156 | PSAP                                      | 10:71396933-71851369   |
| XLOC_007160 | SPOCK2                                    | 10:72059013-72089032   |
| XLOC_007166 | MICU1                                     | 10:72367326-72626191   |
| XLOC_007211 | ZNF503                                    | 10:75269818-75411842   |
| XLOC_007228 | DLG5                                      | 10:77782865-77926801   |
| XLOC_007320 | ANKRD22                                   | 10:88802729-88851947   |
| XLOC_007349 | CPEB3                                     | 10:92046691-92291087   |
| XLOC_007363 | MYOF                                      | 10:93306428-93482476   |
| XLOC_007385 | ALDH18A1                                  | 10:95605928-95656833   |
| XLOC_007395 | PIK3AP1                                   | 10:96593311-96720514   |
| XLOC_007401 | FRAT2                                     | 10:97325426-97343203   |
| XLOC_007432 | DNMBP                                     | 10:99875576-100009967  |
| XLOC_007436 | CHUK,ERLIN1                               | 10:100150093-100267689 |
| XLOC_007462 | FBXW4                                     | 10:101610663-101695491 |
| XLOC_007487 | NT5C2                                     | 10:102918143-103197627 |
| XLOC_007499 | COL17A1,MIR936                            | 10:104031011-104086002 |
| XLOC_007503 | ITPRIP                                    | 10:104309546-104338467 |
| XLOC_007547 | ABLIM1                                    | 10:114430957-114801441 |
| XLOC_007558 | ENO4,KIAA1598                             | 10:116828760-117126586 |
| XLOC_007582 | PRDX3                                     | 10:119167702-119178833 |

|             |                                                      |                        |
|-------------|------------------------------------------------------|------------------------|
| XLOC_007617 | CHST15                                               | 10:123706206-124093607 |
| XLOC_007652 | MKI67                                                | 10:128096604-128126391 |
| XLOC_007736 | -                                                    | 10:23447559-23449396   |
| XLOC_007763 | -                                                    | 10:46283963-46284443   |
| XLOC_007788 | -                                                    | 10:92593082-92695665   |
| XLOC_007825 | -                                                    | 10:124093939-124097076 |
| XLOC_007850 | ATHL1,RP11-326C3.2<br>IFITM1,IFITM2,RP11-326C3.10,RP | 11:287037-297974       |
| XLOC_007851 | 11-326C3.11,RP11-326C3.12,RP11-3<br>26C3.15          | 11:307630-344670       |
| XLOC_007855 | SIGIRR                                               | 11:405714-442296       |
| XLOC_007863 | RASSF7,RP11-496I9.1                                  | 11:532068-564021       |
| XLOC_007869 | TALDO1                                               | 11:747328-785391       |
| XLOC_007897 | AC051649.12,LSP1,hsa-mir-7847                        | 11:1851235-1916360     |
| XLOC_007899 | TNNT3                                                | 11:1916861-1938706     |
| XLOC_007909 | CD81                                                 | 11:2327667-2397691     |
| XLOC_008005 | OR52L2P                                              | 11:6040167-6065138     |
| XLOC_008019 | GVINP1                                               | 11:6691591-6746511     |
| XLOC_008064 | SWAP70                                               | 11:9664076-9753063     |
| XLOC_008069 | ADM                                                  | 11:10304679-10307397   |
| XLOC_008070 | AMPD3                                                | 11:10308312-10541247   |
| XLOC_008102 | FAR1                                                 | 11:13668526-13732349   |
| XLOC_008146 | LDHA                                                 | 11:18394387-18408425   |
| XLOC_008238 | PRRG4                                                | 11:32829739-32858123   |
| XLOC_008257 | CAT                                                  | 11:34438924-34472064   |
| XLOC_008264 | CD44                                                 | 11:35138682-35530300   |
| XLOC_008272 | LDLRAD3                                              | 11:35943980-36232138   |
| XLOC_008278 | PRR5L                                                | 11:36296287-36510537   |
| XLOC_008324 | CD82                                                 | 11:44564426-44622071   |
| XLOC_008360 | SPI1                                                 | 11:47354743-47417460   |
| XLOC_008371 | PTPRJ                                                | 11:47980486-48170957   |
| XLOC_008545 | OR10Y1P,STX3                                         | 11:59712822-59810975   |
| XLOC_008552 | MS4A3                                                | 11:60056558-60080853   |
| XLOC_008556 | MS4A4A                                               | 11:60280540-60308972   |
| XLOC_008557 | MS4A14,MS4A6E,MS4A7                                  | 11:60334830-60418135   |
| XLOC_008572 | CD6                                                  | 11:60971372-61020377   |
| XLOC_008574 | CD5                                                  | 11:61102394-61128735   |
| XLOC_008624 | LGALS12                                              | 11:63506083-63516774   |
| XLOC_008625 | RARRES3                                              | 11:63536808-63546462   |
| XLOC_008629 | RTN3                                                 | 11:63681445-63768775   |
| XLOC_008632 | NAA40                                                | 11:63938709-63958479   |
| XLOC_008671 | SLC22A20                                             | 11:65213839-65242757   |
| XLOC_008696 | CTSW                                                 | 11:65879804-65888585   |
| XLOC_008731 | RAD9A,TBC1D10C                                       | 11:67317413-67425649   |
| XLOC_008751 | ALDH3B1                                              | 11:68008577-68030461   |
| XLOC_008810 | FOLR3                                                | 11:72114868-72141418   |
| XLOC_008816 | INPPL1                                               | 11:72223304-72245664   |
| XLOC_008838 | P2RY2,RP11-800A3.4                                   | 11:73216100-73249867   |
| XLOC_008842 | RELT,RP11-809N8.4                                    | 11:73376263-73598505   |
| XLOC_008847 | PLEKHB1                                              | 11:73646177-73662872   |

|             |                                        |                        |
|-------------|----------------------------------------|------------------------|
| XLOC_008874 | RPS3,SNORD15A                          | 11:75399485-75422280   |
| XLOC_008877 | SERPINH1                               | 11:75562055-75572783   |
| XLOC_008882 | DGAT2                                  | 11:75758454-75803415   |
| XLOC_008895 | ACER3                                  | 11:76860866-77027086   |
| XLOC_008898 | CAPN5                                  | 11:77066931-77126155   |
| XLOC_008900 | MYO7A                                  | 11:77128263-77215785   |
| XLOC_008927 | RPS28P7                                | 11:81879850-82718082   |
| XLOC_008952 | -                                      | 11:85952028-85956624   |
| XLOC_008963 | PRSS23                                 | 11:86791058-86955391   |
| XLOC_009034 | SLC36A4                                | 11:93100625-93198037   |
| XLOC_009054 | FUT4,PIWIL4,RP11-867G2.4               | 11:94539206-94925521   |
| XLOC_009063 | RP11-60C6.5,SRSF8                      | 11:95037332-95071745   |
| XLOC_009067 | ENDOD1                                 | 11:95089799-95134427   |
| XLOC_009126 | RAB39A                                 | 11:107928437-107968144 |
| XLOC_009137 | ZC3H12C                                | 11:110092951-110171872 |
| XLOC_009166 | NCAM1                                  | 11:112959278-113314437 |
| XLOC_009180 | ZBTB16                                 | 11:114059578-114356571 |
| XLOC_009204 | AP000892.6,PAFAH1B2,SIDT2,TA<br>GLN    | 11:117144266-117413268 |
| XLOC_009210 | RP11-728F11.4                          | 11:117427772-117877486 |
| XLOC_009215 | -                                      | 11:118225433-118226383 |
| XLOC_009217 | CD3E                                   | 11:118304433-118316175 |
| XLOC_009218 | CD3G                                   | 11:118334582-118355161 |
| XLOC_009222 | TMEM25,TTC36                           | 11:118435722-118603033 |
| XLOC_009300 | VWA5A                                  | 11:124115361-124147721 |
| XLOC_009321 | ROBO3                                  | 11:124865385-124881471 |
| XLOC_009326 | SLC37A2                                | 11:125062920-125111855 |
| XLOC_009380 | APLP2                                  | 11:130069836-130144811 |
| XLOC_009381 | ST14                                   | 11:130159561-130210376 |
| XLOC_009408 | GLB1L2                                 | 11:134331873-134412078 |
| XLOC_009427 | ANO9,SIGIRR                            | 11:405714-442296       |
| XLOC_009456 | CTSD,IFITM10,KRTAP5-4,RP11-29<br>5K3.1 | 11:1604267-1764025     |
| XLOC_009481 | CDKN1C                                 | 11:2883212-2885881     |
| XLOC_009489 | OSBPL5                                 | 11:3087019-3166739     |
| XLOC_009506 | RHOG                                   | 11:3665586-3840983     |
| XLOC_009592 | PRKCDBP                                | 11:6318945-6320647     |
| XLOC_009593 | APBB1                                  | 11:6390381-6419414     |
| XLOC_009598 | DCHS1                                  | 11:6621261-6655854     |
| XLOC_009609 | CYB5R2                                 | 11:7665099-7677222     |
| XLOC_009638 | DENND5A                                | 11:9138537-9265526     |
| XLOC_009649 | RP11-1H15.1,SBF2                       | 11:9754769-10294215    |
| XLOC_009652 | RP11-351I24.1                          | 11:10300474-10303822   |
| XLOC_009654 | MTRNR2L8,RNF141                        | 11:10308312-10541247   |
| XLOC_009656 | MRVI1                                  | 11:10541271-10693988   |
| XLOC_009670 | DKK3                                   | 11:11963105-12009769   |
| XLOC_009691 | RP11-21L19.1,RRAS2                     | 11:13962688-14364506   |
| XLOC_009742 | E2F8                                   | 11:19182029-19281426   |
| XLOC_009824 | LMO2                                   | 11:33858575-33892289   |
| XLOC_009880 | TP53I11                                | 11:44701526-44951306   |

|             |                            |                        |
|-------------|----------------------------|------------------------|
| XLOC_009922 | MYBPC3                     | 11:47331396-47352702   |
| XLOC_009923 | RP11-750H9.5,SPI1          | 11:47354743-47417460   |
| XLOC_010031 | PRG2,RP11-872D17.8,SLC43A3 | 11:57386793-57427580   |
| XLOC_010033 | SLC43A1                    | 11:57484439-57515788   |
| XLOC_010082 | MPEG1                      | 11:59169996-59213523   |
| XLOC_010101 | TCN1                       | 11:59852799-59866575   |
| XLOC_010102 | AP001257.1,MS4A6A          | 11:60153856-60184666   |
| XLOC_010103 | MIR6503,MS4A4E             | 11:60199286-60243152   |
| XLOC_010132 | FTH1                       | 11:61949820-61969490   |
| XLOC_010193 | MEN1                       | 11:64803509-64811294   |
| XLOC_010194 | CDC42BPG                   | 11:64823118-64844850   |
| XLOC_010221 | LTBP3                      | 11:65525021-65558930   |
| XLOC_010226 | AP5B1                      | 11:65721198-65781033   |
| XLOC_010232 | FOSL1                      | 11:65890105-65900573   |
| XLOC_010245 | CD248                      | 11:66312852-66319237   |
| XLOC_010249 | SLC29A2                    | 11:66347949-66372463   |
| XLOC_010255 | CTSF                       | 11:66563462-66568841   |
| XLOC_010278 | CORO1B,PTPRCAP             | 11:67427989-67448783   |
| XLOC_010294 | UNC93B1,UNC93B5            | 11:67711701-68007037   |
| XLOC_010314 | CPT1A                      | 11:68754619-68844410   |
| XLOC_010397 | KCNE3                      | 11:74330314-74486051   |
| XLOC_010448 | PAK1                       | 11:77321706-77477030   |
| XLOC_010464 | GAB2                       | 11:78139770-78574874   |
| XLOC_010485 | PRCP                       | 11:82822696-83071923   |
| XLOC_010506 | SYTL2                      | 11:85694223-85811175   |
| XLOC_010509 | PICALM                     | 11:85957683-86069882   |
| XLOC_010515 | ME3                        | 11:86431589-86672636   |
| XLOC_010582 | SLC36A4                    | 11:93100625-93198037   |
| XLOC_010587 | SMCO4                      | 11:93478471-93543508   |
| XLOC_010595 | RP11-680H20.1              | 11:94188448-94188997   |
| XLOC_010641 | MMP8                       | 11:102711727-102727050 |
| XLOC_010659 | PDGFD                      | 11:103675993-104164379 |
| XLOC_010663 | RP11-693N9.2               | 11:104901548-104919073 |
| XLOC_010666 | CARD16,CARD17,CASP1        | 11:105023530-105101445 |
| XLOC_010700 | KDEL2                      | 11:108472104-108498631 |
| XLOC_010759 | USP28                      | 11:113797873-113875627 |
| XLOC_010790 | RP11-109L13.1              | 11:117134999-117138858 |
| XLOC_010799 | FXVD2,FXVD6,FXVD6-FXVD2    | 11:117427772-117877486 |
| XLOC_010809 | CD3D                       | 11:118334582-118355161 |
| XLOC_010820 | BCL9L                      | 11:118882614-118958559 |
| XLOC_010825 | HYOU1                      | 11:119044187-119057252 |
| XLOC_010868 | HSPA8,SNORD14C,SNORD14D    | 11:123057488-123228277 |
| XLOC_010920 | FEZ1                       | 11:125445744-125499528 |
| XLOC_010945 | -                          | 11:128290053-128294076 |
| XLOC_010946 | ETS1                       | 11:128458760-128587558 |
| XLOC_011002 | B3GAT1                     | 11:134331873-134412078 |
| XLOC_011017 | -                          | 11:10296360-10300423   |
| XLOC_011055 | -                          | 11:65522015-65524859   |
| XLOC_011137 | CCND2                      | 12:4248764-4305350     |
| XLOC_011155 | LTBR,RP1-102E24.8          | 12:6346842-6413803     |

|             |                                                                     |                      |
|-------------|---------------------------------------------------------------------|----------------------|
| XLOC_011161 | GAPDH                                                               | 12:6533926-6538374   |
| XLOC_011170 | LAG3                                                                | 12:6772363-6778456   |
| XLOC_011177 | C12orf57,RNU7-1                                                     | 12:6942977-6946029   |
| XLOC_011205 | CLEC4A,FAM66C,ZNF705A                                               | 12:8123631-8221115   |
| XLOC_011213 | CLEC6A                                                              | 12:8455925-8481063   |
| XLOC_011216 | CLEC4D                                                              | 12:8504997-8568035   |
| XLOC_011229 | A2MP1,KRT17P8,LINC00987,RP11-118B22.4,RP11-436I9.6                  | 12:9055585-9275817   |
| XLOC_011235 | RP11-726G1.1                                                        | 12:9467551-9584141   |
| XLOC_011237 | CLEC2D,GOT2P3,RP11-705C15.2,RP11-705C15.3,RP11-705C15.5,RP11-75L1.1 | 12:9633418-9740556   |
| XLOC_011238 | KLRF1                                                               | 12:9827309-9870830   |
| XLOC_011246 | CLEC7A                                                              | 12:10116290-10130261 |
| XLOC_011247 | TMEM52B                                                             | 12:10158300-10191801 |
| XLOC_011249 | KLRD1                                                               | 12:10226057-10330519 |
| XLOC_011250 | RP11-277P12.20                                                      | 12:10356794-10523135 |
| XLOC_011252 | RP11-291B21.2                                                       | 12:10553336-10579451 |
| XLOC_011265 | ETV6                                                                | 12:11649494-11895503 |
| XLOC_011288 | HTR7P1,RP11-377D9.3                                                 | 12:13000419-13040679 |
| XLOC_011310 | PTPRO                                                               | 12:15107782-15598592 |
| XLOC_011316 | MGST1                                                               | 12:16347141-16610594 |
| XLOC_011335 | PLEKHA5                                                             | 12:19129690-19376550 |
| XLOC_011385 | SSPN                                                                | 12:26120025-26833287 |
| XLOC_011412 | FAR2                                                                | 12:29148873-29381209 |
| XLOC_011447 | FGD4                                                                | 12:32399528-32646050 |
| XLOC_011470 | LRRK2                                                               | 12:40186008-40369285 |
| XLOC_011604 | METTL7A                                                             | 12:50923471-50932521 |
| XLOC_011625 | ACVRL1                                                              | 12:51906907-51923361 |
| XLOC_011626 | ACVR1B                                                              | 12:51951666-51997450 |
| XLOC_011628 | GRASP                                                               | 12:52006928-52015966 |
| XLOC_011629 | NR4A1                                                               | 12:52022831-52059507 |
| XLOC_011654 | SOAT2                                                               | 12:53102958-53124538 |
| XLOC_011661 | ESPL1                                                               | 12:53268287-53293643 |
| XLOC_011663 | SP1                                                                 | 12:53380036-53416453 |
| XLOC_011736 | CDK2,DGKA                                                           | 12:55901412-55973317 |
| XLOC_011746 | COQ10A                                                              | 12:56266748-56271119 |
| XLOC_011760 | LRP1                                                                | 12:57088893-57213361 |
| XLOC_011771 | DTX3                                                                | 12:57604621-57609804 |
| XLOC_011772 | ARHGEF25                                                            | 12:57610179-57633355 |
| XLOC_011839 | MSRB3                                                               | 12:65278552-65642372 |
| XLOC_011851 | IRAK3,MIR6502                                                       | 12:66188802-66257434 |
| XLOC_011858 | DYRK2                                                               | 12:67648337-67729475 |
| XLOC_011877 | LYZ                                                                 | 12:69348340-69354734 |
| XLOC_011884 | -                                                                   | 12:69636558-69636668 |
| XLOC_011911 | ATXN7L3B                                                            | 12:74537826-74545430 |
| XLOC_011918 | GLIPR1                                                              | 12:75480322-75511636 |
| XLOC_011970 | TMTC2                                                               | 12:82686874-83134870 |
| XLOC_012040 | SOCS2                                                               | 12:93542462-93583487 |
| XLOC_012045 | PLXNC1                                                              | 12:94148722-94459988 |



|             |                                                                |                        |
|-------------|----------------------------------------------------------------|------------------------|
| XLOC_012080 | APAF1                                                          | 12:98613404-99984654   |
| XLOC_012106 | DRAM1                                                          | 12:101877348-102062149 |
| XLOC_012137 | KIAA1033                                                       | 12:105107323-105412817 |
| XLOC_012149 | TMEM263                                                        | 12:106953477-106987195 |
| XLOC_012172 | UNG                                                            | 12:109097573-109110992 |
| XLOC_012201 | SH2B3                                                          | 12:111405947-111451963 |
| XLOC_012205 | ACAD10,ALDH2,RP11-162P23.2                                     | 12:111686050-111814448 |
| XLOC_012220 | RPH3A                                                          | 12:112570379-112898881 |
| XLOC_012233 | SDSL                                                           | 12:113392444-113438277 |
| XLOC_012298 | CCDC64                                                         | 12:119988885-120094797 |
| XLOC_012326 | P2RX7,RP11-340F14.6                                            | 12:121132796-121191518 |
| XLOC_012329 | CAMKK2                                                         | 12:121237361-121298308 |
| XLOC_012335 | ORAI1                                                          | 12:121626387-121643151 |
| XLOC_012374 | TCTN2                                                          | 12:123671112-123708403 |
| XLOC_012432 | GLT1D1                                                         | 12:128843300-128985103 |
| XLOC_012524 | FBXL14                                                         | 12:1523100-1647243     |
| XLOC_012574 | TNFRSF1A                                                       | 12:6328756-6342114     |
| XLOC_012586 | LPAR5                                                          | 12:6614697-6636447     |
| XLOC_012599 | C1R,C1RL                                                       | 12:7080208-7158945     |
| XLOC_012603 | CD163,CD163L1                                                  | 12:7346684-7503893     |
| XLOC_012608 | CLEC4C                                                         | 12:7724363-7751605     |
| XLOC_012614 | SLC2A3                                                         | 12:7919169-7936275     |
| XLOC_012617 | C3AR1                                                          | 12:8058301-8066471     |
| XLOC_012633 | CLEC4E,RP11-561P12.5                                           | 12:8504997-8568035     |
| XLOC_012651 | KLRB1                                                          | 12:9594550-9607886     |
| XLOC_012664 | CLEC7A                                                         | 12:10116290-10130261   |
| XLOC_012665 | OLR1                                                           | 12:10158300-10191801   |
| XLOC_012668 | KLRC1,KLRC2,KLRC3,KLRC4,KLRC4-KLRK1,KLRK1,NKG2-E,RP11-277P12.9 | 12:10356794-10523135   |
| XLOC_012671 | STYK1                                                          | 12:10618938-10674318   |
| XLOC_012672 | YBX3                                                           | 12:10699088-10725972   |
| XLOC_012702 | MANSC1                                                         | 12:12326055-12350541   |
| XLOC_012724 | PLBD1                                                          | 12:14356841-14771167   |
| XLOC_012765 | LDHB                                                           | 12:21635341-21775581   |
| XLOC_012780 | BCAT1                                                          | 12:24810021-24960158   |
| XLOC_012786 | KRAS                                                           | 12:25108419-25326458   |
| XLOC_012833 | TMTC1                                                          | 12:29500839-29784759   |
| XLOC_012877 | PKP2                                                           | 12:32790744-32896840   |
| XLOC_012900 | CPNE8                                                          | 12:38646821-38909592   |
| XLOC_012905 | ABCD2,AC121334.1,KIF21A                                        | 12:39293227-39620414   |
| XLOC_012950 | NELL2                                                          | 12:44508274-44921848   |
| XLOC_012963 | SLC38A1                                                        | 12:46182830-46275957   |
| XLOC_012972 | PCED1B-AS1                                                     | 12:47075706-47279021   |
| XLOC_012985 | VDR                                                            | 12:47840614-47943048   |
| XLOC_013018 | WNT10B                                                         | 12:48965339-48982587   |
| XLOC_013021 | RHEBL1                                                         | 12:49064684-49070025   |
| XLOC_013036 | NCKAP5L                                                        | 12:49790676-49843129   |
| XLOC_013044 | LIMA1                                                          | 12:50175787-50283546   |
| XLOC_013099 | KRT72,KRT73                                                    | 12:52585588-52630855   |

|             |                                      |                        |
|-------------|--------------------------------------|------------------------|
| XLOC_013119 | ITGB7                                | 12:53157662-53209759   |
| XLOC_013144 | GPR84                                | 12:54353660-54588659   |
| XLOC_013153 | TESPA1                               | 12:54915350-54985215   |
| XLOC_013167 | CD63                                 | 12:55681545-55731249   |
| XLOC_013224 | AGAP2                                | 12:57723361-57760407   |
| XLOC_013287 | GNS                                  | 12:64713324-64759447   |
| XLOC_013303 | AC078889.1,RBMS1P1,RP11-335I1<br>2.2 | 12:66188802-66257434   |
| XLOC_013323 | RP11-81H14.1,RP11-81H14.2            | 12:68332887-68451932   |
| XLOC_013425 | LIN7A                                | 12:80792365-81759553   |
| XLOC_013458 | DUSP6                                | 12:89347231-89360316   |
| XLOC_013484 | RP11-887P2.3                         | 12:93640821-93641586   |
| XLOC_013508 | NTN4                                 | 12:95649254-95791152   |
| XLOC_013513 | LTA4H                                | 12:95972505-96110323   |
| XLOC_013534 | SLC9A7P1                             | 12:98450442-98457293   |
| XLOC_013545 | RP11-135F9.3,UHRF1BP1L               | 12:100028454-100142922 |
| XLOC_013585 | NT5DC3,RP11-341G23.4                 | 12:103587272-103841236 |
| XLOC_013602 | CKAP4                                | 12:106237876-106349332 |
| XLOC_013610 | MTERF2                               | 12:106953477-106987195 |
| XLOC_013611 | CRY1                                 | 12:106991299-107123314 |
| XLOC_013622 | CMKLR1                               | 12:108284832-108339559 |
| XLOC_013627 | CORO1C                               | 12:108617707-108731933 |
| XLOC_013644 | TRPV4                                | 12:109782935-109833436 |
| XLOC_013645 | GLTP                                 | 12:109850938-109880488 |
| XLOC_013653 | ANAPC7,ARPC3,RP11-478C19.2           | 12:110372899-110450422 |
| XLOC_013659 | HVCN1                                | 12:110614026-110704950 |
| XLOC_013723 | TESC                                 | 12:117038922-117099479 |
| XLOC_013729 | WSB2                                 | 12:118013587-118062430 |
| XLOC_013748 | GCN1L1                               | 12:120127025-120194721 |
| XLOC_013781 | CAMKK2                               | 12:121237361-121298308 |
| XLOC_013794 | CLIP1                                | 12:122271431-122422680 |
| XLOC_013815 | RILPL2                               | 12:123383772-123438358 |
| XLOC_013853 | LINC00944                            | 12:126703391-126772450 |
| XLOC_013915 | RNU6-1017P                           | 12:131808975-131827634 |
| XLOC_013929 | -                                    | 12:132427401-132447244 |
| XLOC_014160 | C1QTNF9,RP11-307N16.6,SPATA1<br>3    | 13:23979699-24322535   |
| XLOC_014174 | PABPC3                               | 13:25095867-25099254   |
| XLOC_014179 | NUPL1                                | 13:25300123-25349800   |
| XLOC_014229 | ALOX5AP                              | 13:30713477-30764426   |
| XLOC_014247 | KL                                   | 13:33016432-33066204   |
| XLOC_014318 | LACC1                                | 13:43823908-43893932   |
| XLOC_014377 | ARL11                                | 13:49628298-49642426   |
| XLOC_014414 | HNRNPA1L2,MRPS31P4,RP11-78J<br>21.7  | 13:52600041-52644600   |
| XLOC_014418 | OLFM4                                | 13:53008040-53052058   |
| XLOC_014501 | KLF5                                 | 13:73054975-73077542   |
| XLOC_014508 | LINC00381,LINC00402,RPL21P108        | 13:74231381-74444637   |
| XLOC_014518 | AC000403.4                           | 13:76887550-76891135   |
| XLOC_014593 | DNAJC3                               | 13:95677138-95794989   |

|             |                              |                        |
|-------------|------------------------------|------------------------|
| XLOC_014625 | TM9SF2                       | 13:99498535-99564127   |
| XLOC_014662 | RP11-153I24.4,TNFSF13B       | 13:108244081-108308505 |
| XLOC_014670 | IRS2                         | 13:109751874-109808252 |
| XLOC_014702 | ATP11A                       | 13:112686717-112887216 |
| XLOC_014705 | MCF2L                        | 13:112894377-113099739 |
| XLOC_014721 | TMCO3                        | 13:113455402-113554590 |
| XLOC_014732 | -                            | 13:114154580-114179593 |
| XLOC_014803 | ZDHHC20                      | 13:21372487-21459397   |
| XLOC_014825 | SACS                         | 13:23328697-23433728   |
| XLOC_014846 | MTMR6                        | 13:25228553-25288009   |
| XLOC_014876 | FLT3                         | 13:28003267-28100732   |
| XLOC_014888 | SLC7A1                       | 13:29509409-29595746   |
| XLOC_015049 | LCP1                         | 13:46125687-46211871   |
| XLOC_015051 | KIAA0226L,LINC00563,PPP1R2P4 | 13:46211942-46438190   |
| XLOC_015091 | DLEU2,MIR15A,MIR3613         | 13:49954415-50849905   |
| XLOC_015167 | PCDH9                        | 13:66302833-67230445   |
| XLOC_015181 | DACH1                        | 13:71437965-71867192   |
| XLOC_015195 | KLF12                        | 13:73686031-74134346   |
| XLOC_015201 | TBC1D4                       | 13:75284664-75482659   |
| XLOC_015208 | AC000403.1,KCTD12            | 13:76880165-76886400   |
| XLOC_015309 | DOCK9                        | 13:98793486-99088625   |
| XLOC_015316 | CCR12P                       | 13:99393668-99417681   |
| XLOC_015377 | IRS2                         | 13:109751874-109808252 |
| XLOC_015386 | RAB20                        | 13:110523065-110561772 |
| XLOC_015388 | CARS2                        | 13:110613081-110723339 |
| XLOC_015419 | LINC00565,RASA3              | 13:113926427-114132857 |
| XLOC_015429 | -                            | 13:18746024-18746429   |
| XLOC_015448 | -                            | 13:49642633-49645308   |
| XLOC_015449 | -                            | 13:49645451-49646561   |
| XLOC_015556 | RP11-203M5.6                 | 14:20427236-20443793   |
| XLOC_015563 | ANG,RNASE4                   | 14:20684099-20707120   |
| XLOC_015566 | RNASE6,RP11-219E7.1          | 14:20781050-20787625   |
| XLOC_015567 | RNASE3                       | 14:20891398-20892348   |
| XLOC_015568 | RP11-84C10.2                 | 14:20897984-20936255   |
| XLOC_015569 | RNASE2                       | 14:20955451-20956440   |
| XLOC_015576 | ARHGEF40                     | 14:21016762-21104722   |
| XLOC_015587 | TRAV1-1                      | 14:21612717-21632133   |
| XLOC_015601 | TRAV8-2,TRAV8-3              | 14:21846464-21866608   |
| XLOC_015602 | TRAV13-1                     | 14:21868693-21869714   |
| XLOC_015603 | TRAV12-2                     | 14:21887856-21888502   |
| XLOC_015605 | TRAV13-2                     | 14:21918016-21920018   |
| XLOC_015607 | TRAV9-2                      | 14:21941127-21941657   |
| XLOC_015609 | TRAV12-3                     | 14:21965347-21966218   |
| XLOC_015611 | TRAV16                       | 14:21990495-21990938   |
| XLOC_015612 | TRAV17                       | 14:21997538-21998168   |
| XLOC_015614 | TRAV19                       | 14:22007511-22008181   |
| XLOC_015621 | TRDV1                        | 14:22096031-22096619   |
| XLOC_015622 | TRAV24                       | 14:22105342-22105846   |
| XLOC_015623 | TRAV25                       | 14:22112346-22113031   |
| XLOC_015624 | TRAV26-1                     | 14:22123317-22124285   |

|             |                                                                                                                 |                        |
|-------------|-----------------------------------------------------------------------------------------------------------------|------------------------|
| XLOC_015627 | TRAV27                                                                                                          | 14:22147994-22148633   |
| XLOC_015629 | TRAV29DV5                                                                                                       | 14:22163237-22163870   |
| XLOC_015640 | AE000661.37,TRAC,TRAJ21,TRAJ23,TRAJ29,TRAJ32,TRAJ39,TRAJ54,TRAV38-2DV8,TRDC,TRDD3,TRDJ1,TRDJ2,TRDJ3,TRDJ4,TRDV2 | 14:22281104-22552155   |
| XLOC_015745 | RP11-104E19.1                                                                                                   | 14:24595722-24657774   |
| XLOC_015963 | LGALS3                                                                                                          | 14:55124109-55145413   |
| XLOC_015978 | PELI2                                                                                                           | 14:56117008-56301663   |
| XLOC_016032 | FLJ22447,PRKCH,RP11-47I22.4                                                                                     | 14:61187558-61658696   |
| XLOC_016033 | HIF1A,RP11-618G20.1,SNAPC1                                                                                      | 14:61681040-61796552   |
| XLOC_016053 | SYNE2                                                                                                           | 14:63852524-64338599   |
| XLOC_016061 | PLEKHG3                                                                                                         | 14:64703672-64879883   |
| XLOC_016125 | SIPA1L1                                                                                                         | 14:71292728-71741229   |
| XLOC_016136 | PSEN1                                                                                                           | 14:73136251-73223797   |
| XLOC_016176 | FOS                                                                                                             | 14:75278511-75397025   |
| XLOC_016178 | JDP2                                                                                                            | 14:75423682-75474168   |
| XLOC_016180 | FLVCR2,IFT43,TTLL5                                                                                              | 14:75574887-76084585   |
| XLOC_016233 | CTD-2341M24.1                                                                                                   | 14:85934613-86160901   |
| XLOC_016290 | SLC24A4                                                                                                         | 14:92322580-92509155   |
| XLOC_016347 | CTD-2506J14.1                                                                                                   | 14:97458815-97581601   |
| XLOC_016348 | RP11-204N11.1                                                                                                   | 14:97706147-97775075   |
| XLOC_016367 | EVL                                                                                                             | 14:99971448-100167219  |
| XLOC_016383 | -                                                                                                               | 14:100683747-100689596 |
| XLOC_016510 | RCOR1                                                                                                           | 14:102592660-102730576 |
| XLOC_016542 | TDRD9                                                                                                           | 14:103928455-104052667 |
| XLOC_016570 | CRIP2                                                                                                           | 14:105472961-105480321 |
| XLOC_016572 | TMEM121                                                                                                         | 14:105526602-105530202 |
| XLOC_016660 | MIR6717,NDRG2                                                                                                   | 14:21016762-21104722   |
| XLOC_016675 | SALL2                                                                                                           | 14:21521080-21537216   |
| XLOC_016680 | OR10G2                                                                                                          | 14:21632338-21636222   |
| XLOC_016705 | SLC7A7                                                                                                          | 14:22702142-22829820   |
| XLOC_016712 | AJUBA,HAUS4,MIR4707,RP11-298I3.5                                                                                | 14:22929608-22982642   |
| XLOC_016715 | CDH24                                                                                                           | 14:23047061-23057581   |
| XLOC_016717 | CEBPE                                                                                                           | 14:23117303-23120265   |
| XLOC_016747 | CTSG                                                                                                            | 14:24573521-24576914   |
| XLOC_016748 | GZMH                                                                                                            | 14:24595722-24657774   |
| XLOC_016749 | GZMB                                                                                                            | 14:24595722-24657774   |
| XLOC_016804 | SPTSSA                                                                                                          | 14:33924230-34462774   |
| XLOC_016813 | BAZ1A                                                                                                           | 14:34752671-34876705   |
| XLOC_016823 | NFKBIA                                                                                                          | 14:35397754-35405287   |
| XLOC_016906 | RPL32P29,RPS29                                                                                                  | 14:49543094-49614824   |
| XLOC_016933 | PYGL                                                                                                            | 14:50848121-50944736   |
| XLOC_016953 | ERO1L                                                                                                           | 14:52639825-52695944   |
| XLOC_016968 | CNIH1                                                                                                           | 14:54423232-54441442   |
| XLOC_016969 | GMFB                                                                                                            | 14:54474399-54489196   |
| XLOC_016978 | DLGAP5                                                                                                          | 14:55148111-55191678   |
| XLOC_017049 | WDR89                                                                                                           | 14:63589702-63652079   |
| XLOC_017104 | ZFP36L1                                                                                                         | 14:68787436-68796458   |

|             |                                                                                                                                                                                |                        |
|-------------|--------------------------------------------------------------------------------------------------------------------------------------------------------------------------------|------------------------|
| XLOC_017106 | ACTN1,HMGN1P3                                                                                                                                                                  | 14:68870327-68987463   |
| XLOC_017148 | NUMB,RP1-240K6.3,RP4-647C14.3                                                                                                                                                  | 14:73237496-73477175   |
| XLOC_017156 | PNMA1                                                                                                                                                                          | 14:73711782-73714372   |
| XLOC_017173 | LTBP2,MIR4709,NPC2                                                                                                                                                             | 14:74476191-74612378   |
| XLOC_017217 | TMED8                                                                                                                                                                          | 14:77334760-77391497   |
| XLOC_017221 | SPTLC2                                                                                                                                                                         | 14:77505869-77616878   |
| XLOC_017295 | GPR68                                                                                                                                                                          | 14:90847860-91259323   |
| XLOC_017296 | CCDC88C                                                                                                                                                                        | 14:91271185-91417901   |
| XLOC_017299 | CATSPERB,TC2N                                                                                                                                                                  | 14:91580695-91867721   |
| XLOC_017304 | FBLN5                                                                                                                                                                          | 14:91869409-91947987   |
| XLOC_017325 | DDX24                                                                                                                                                                          | 14:94026328-94103846   |
| XLOC_017327 | SERPINA1                                                                                                                                                                       | 14:94130563-94390772   |
| XLOC_017341 | CLMN,CTD-2240H23.2                                                                                                                                                             | 14:95181937-95319906   |
| XLOC_017362 | LINC01550                                                                                                                                                                      | 14:97925609-97978281   |
| XLOC_017371 | BCL11B                                                                                                                                                                         | 14:99169234-99272310   |
| XLOC_017372 | -                                                                                                                                                                              | 14:99279784-99287503   |
| XLOC_017386 | WARS                                                                                                                                                                           | 14:100333787-100530303 |
| XLOC_017418 | CDC42BPB                                                                                                                                                                       | 14:102922655-103057479 |
| XLOC_017427 | CKB                                                                                                                                                                            | 14:103519658-103523111 |
| XLOC_017434 | PPP1R13B                                                                                                                                                                       | 14:103733751-103847590 |
| XLOC_017458 | -                                                                                                                                                                              | 14:105075347-105089606 |
| XLOC_017600 | IGHV3-74                                                                                                                                                                       | 14:106810374-106811131 |
| XLOC_017659 | -                                                                                                                                                                              | 14:99052937-99059398   |
| XLOC_017660 | -                                                                                                                                                                              | 14:99059570-99063424   |
| XLOC_017661 | -                                                                                                                                                                              | 14:99063497-99066486   |
| XLOC_017728 | RP11-603B24.1                                                                                                                                                                  | 15:22253527-22297735   |
| XLOC_017736 | WHAMMP3                                                                                                                                                                        | 15:22664358-22687892   |
| XLOC_017739 | NIPA1,RP11-566K19.6                                                                                                                                                            | 15:22757856-22829791   |
| XLOC_017751 | MKRN3                                                                                                                                                                          | 15:23565677-23630075   |
| XLOC_017760 | PWAR5,PWAR6,RP11-701H24.7,SNHG14,SNORD107,SNORD115-13,SNORD115-26,SNORD115-46,SNORD115-7,SNORD116,SNORD116-20,SNORD116-22,SNORD116-3,SNORD116-4,SNORD116-5,SNORD64,SNRPN,SNURF | 15:24823646-25439094   |
| XLOC_017863 | WHAMMP2                                                                                                                                                                        | 15:28701393-28764438   |
| XLOC_017865 | APBA2                                                                                                                                                                          | 15:28884482-29118315   |
| XLOC_017869 | HMGN2P5                                                                                                                                                                        | 15:29699366-29968865   |
| XLOC_017939 | GOLGA8B                                                                                                                                                                        | 15:34525085-34588503   |
| XLOC_017979 | THBS1                                                                                                                                                                          | 15:39580370-39599905   |
| XLOC_018001 | BAHD1                                                                                                                                                                          | 15:40439720-40468242   |
| XLOC_018006 | CASC5                                                                                                                                                                          | 15:40594019-40664342   |
| XLOC_018013 | SPINT1                                                                                                                                                                         | 15:40835807-40858207   |
| XLOC_018025 | CHP1                                                                                                                                                                           | 15:41230838-41281927   |
| XLOC_018027 | NUSAP1                                                                                                                                                                         | 15:41332693-41381050   |
| XLOC_018093 | BLOC1S6,HMGN2P46,RP11-96O20.4,SQRDL                                                                                                                                            | 15:45430528-45691294   |
| XLOC_018199 | AQP9                                                                                                                                                                           | 15:57953423-58569843   |
| XLOC_018229 | RPS3AP6                                                                                                                                                                        | 15:59768351-59769146   |

|             |                                      |                      |
|-------------|--------------------------------------|----------------------|
| XLOC_018261 | LACTB                                | 15:63121799-63158021 |
| XLOC_018265 | USP3                                 | 15:63500736-63602428 |
| XLOC_018282 | AC069368.3,ANKDD1A,PLEKHO2           | 15:64841882-64990310 |
| XLOC_018311 | SMAD3                                | 15:67063762-67195195 |
| XLOC_018333 | KIF23                                | 15:69298946-69448427 |
| XLOC_018394 | SCAMP5                               | 15:74954415-75021496 |
| XLOC_018399 | C15orf39                             | 15:75195642-75213743 |
| XLOC_018472 | ST20-AS1                             | 15:79833584-79927152 |
| XLOC_018474 | BCL2A1                               | 15:79960888-80017858 |
| XLOC_018488 | IL16                                 | 15:81159574-81324183 |
| XLOC_018571 | ABHD2                                | 15:89087077-89202386 |
| XLOC_018576 | LINC00925                            | 15:89361578-89398487 |
| XLOC_018586 | ANPEP                                | 15:89784888-89815419 |
| XLOC_018600 | IQGAP1                               | 15:90249529-90502253 |
| XLOC_018610 | FURIN                                | 15:90868591-90883629 |
| XLOC_018611 | FES,MAN2A2                           | 15:90883694-90922584 |
| XLOC_018620 | SLCO3A1                              | 15:91852977-92331037 |
| XLOC_018672 | ARRDC4                               | 15:97960697-98021777 |
| XLOC_018795 | CYFIP1                               | 15:22838640-22981063 |
| XLOC_018820 | ATP10A                               | 15:25673178-25865172 |
| XLOC_018917 | LPCAT4                               | 15:34358617-34367704 |
| XLOC_018919 | GOLGA8A                              | 15:34379067-34437498 |
| XLOC_018950 | RASGRP1                              | 15:38453966-38565575 |
| XLOC_018957 | CTD-2033D15.1,CTD-2033D15.3          | 15:39580370-39599905 |
| XLOC_018964 | BMF                                  | 15:40087889-40108899 |
| XLOC_018998 | LTK                                  | 15:41503637-41513900 |
| XLOC_019097 | FBN1                                 | 15:48408305-48645849 |
| XLOC_019112 | ATP8B4                               | 15:49857986-50236395 |
| XLOC_019126 | DMXL2                                | 15:51414096-51625289 |
| XLOC_019141 | GNB5                                 | 15:52115104-52295798 |
| XLOC_019158 | PIGBOS1,RAB27A                       | 15:55202965-55508234 |
| XLOC_019160 | CCPG1,DYX1C1,DYX1C1-CCPG1,<br>MIR628 | 15:55202965-55508234 |
| XLOC_019166 | NEDD4                                | 15:55826921-55993746 |
| XLOC_019188 | ALDH1A2                              | 15:57953423-58569843 |
| XLOC_019191 | AQP9                                 | 15:57953423-58569843 |
| XLOC_019216 | BNIP2                                | 15:59594874-59690575 |
| XLOC_019217 | -                                    | 15:59690672-59696227 |
| XLOC_019221 | ANXA2                                | 15:60347133-60402883 |
| XLOC_019224 | RORA,uc_338                          | 15:60479177-61229319 |
| XLOC_019249 | -                                    | 15:63488370-63498038 |
| XLOC_019254 | DAPK2                                | 15:63907035-64072033 |
| XLOC_019255 | FAM96A                               | 15:64072558-64094018 |
| XLOC_019262 | OAZ2                                 | 15:64687572-64719602 |
| XLOC_019333 | UACA                                 | 15:70654553-70763593 |
| XLOC_019350 | PKM                                  | 15:72199028-72233377 |
| XLOC_019360 | ADPGK                                | 15:72751364-72798199 |
| XLOC_019367 | NPTN                                 | 15:73443157-73634134 |
| XLOC_019414 | IMP3                                 | 15:75636138-75662336 |
| XLOC_019463 | CTSH                                 | 15:78900341-78949574 |

|             |                                |                        |
|-------------|--------------------------------|------------------------|
| XLOC_019464 | RASGRF1                        | 15:78959946-79090773   |
| XLOC_019474 | BCL2A1                         | 15:79960888-80017858   |
| XLOC_019501 | AC245033.1,GOLGA2P10           | 15:82459471-82513965   |
| XLOC_019533 | SEC11A                         | 15:84669537-84721164   |
| XLOC_019570 | HAPLN3                         | 15:88877287-88895629   |
| XLOC_019571 | MFGE8                          | 15:88898682-88913435   |
| XLOC_019589 | ANPEP                          | 15:89784888-89815419   |
| XLOC_019701 | CHSY1                          | 15:101175499-101252637 |
| XLOC_019711 | TARSL2                         | 15:101653597-101725987 |
| XLOC_019747 | -                              | 15:66843035-66846404   |
| XLOC_019780 | HBA2                           | 16:172846-173710       |
| XLOC_019815 | CACNA1H                        | 16:1153240-1225257     |
| XLOC_019830 | TMEM204                        | 16:1485885-1612110     |
| XLOC_019893 | LA16c-380H5.5                  | 16:3006119-3014505     |
| XLOC_019898 | MMP25                          | 16:3022619-3061081     |
| XLOC_019899 | IL32,RNU1-125P,RNU1-22P        | 16:3064566-3087704     |
| XLOC_019931 | HMOX2                          | 16:4461659-4510612     |
| XLOC_019967 | C16orf72,RP11-473I1.9          | 16:9091604-9121640     |
| XLOC_020079 | CTD-2349B8.1,ITPRIPL2,SYT17    | 16:19113388-19268334   |
| XLOC_020111 | METTL9                         | 16:21597217-21657598   |
| XLOC_020148 | PRKCB                          | 16:23835943-24220611   |
| XLOC_020178 | IL4R                           | 16:27313386-27364895   |
| XLOC_020179 | IL21R                          | 16:27402161-27453393   |
| XLOC_020188 | SBK1                           | 16:28241267-28331934   |
| XLOC_020194 | APOBR                          | 16:28456371-28512051   |
| XLOC_020208 | LAT,RP11-264B17.3,SPNS1        | 16:28973845-28990783   |
| XLOC_020221 | AC009133.22,QPRT,SPN           | 16:29662789-29735401   |
| XLOC_020233 | ALDOA                          | 16:30053089-30070457   |
| XLOC_020252 | ITGAL                          | 16:30472653-30523523   |
| XLOC_020284 | ITGAM                          | 16:31259917-31336040   |
| XLOC_020285 | ITGAX                          | 16:31354678-31384230   |
| XLOC_020501 | RBL2                           | 16:53433976-53504411   |
| XLOC_020515 | LPCAT2,RP11-212I21.4           | 16:55508997-55586670   |
| XLOC_020550 | CPNE2                          | 16:57092403-57152166   |
| XLOC_020561 | GPR114,HMGB3P32                | 16:57542420-57607359   |
| XLOC_020562 | GPR56                          | 16:57610651-57665741   |
| XLOC_020563 | GPR97                          | 16:57668186-57731805   |
| XLOC_020578 | NDRG4                          | 16:58462845-58513756   |
| XLOC_020613 | LINC00920                      | 16:66408509-66413158   |
| XLOC_020624 | PDP2,RP11-61A14.2,RP11-61A14.3 | 16:66878588-66895754   |
| XLOC_020631 | NOL3                           | 16:67170153-67190204   |
| XLOC_020642 | RLTPR                          | 16:67644889-67660815   |
| XLOC_020656 | PLA2G15                        | 16:68245303-68261406   |
| XLOC_020729 | HP,HPR                         | 16:72008522-72176878   |
| XLOC_020849 | ATP2C2                         | 16:84368494-84467361   |
| XLOC_020855 | CRISPLD2                       | 16:84819983-84939603   |
| XLOC_020860 | KIAA0513                       | 16:85027750-85094393   |
| XLOC_020914 | ZFPM1                          | 16:88453316-88537287   |
| XLOC_020916 | -                              | 16:88540059-88560351   |
| XLOC_020926 | CDT1                           | 16:88803212-88809258   |

|             |                                                                                                          |                      |
|-------------|----------------------------------------------------------------------------------------------------------|----------------------|
| XLOC_020950 | VPS9D1-AS1,ZNF276                                                                                        | 16:89707133-89938761 |
| XLOC_020956 | AC137934.1,FAM157C                                                                                       | 16:90101003-90222678 |
| XLOC_020964 | AXIN1                                                                                                    | 16:287439-355394     |
| XLOC_020968 | RAB11FIP3                                                                                                | 16:425618-523079     |
| XLOC_021025 | MSRB1                                                                                                    | 16:1935541-1943466   |
| XLOC_021044 | ABCA3                                                                                                    | 16:2275880-2426699   |
| XLOC_021067 | PRSS30P                                                                                                  | 16:2830168-2843189   |
| XLOC_021072 | PKMYT1                                                                                                   | 16:2963943-2980539   |
| XLOC_021079 | RP11-473M20.7                                                                                            | 16:3022619-3061081   |
| XLOC_021086 | MEFV                                                                                                     | 16:3162131-3256955   |
| XLOC_021098 | NLRC3                                                                                                    | 16:3365098-3577774   |
| XLOC_021100 | RP11-461A8.4,TRAP1                                                                                       | 16:3611662-3717597   |
| XLOC_021112 | CDIP1                                                                                                    | 16:4510674-4538861   |
| XLOC_021213 | CPPED1                                                                                                   | 16:12651736-12804017 |
| XLOC_021324 | IGSF6                                                                                                    | 16:21597217-21657598 |
| XLOC_021387 | SBK1                                                                                                     | 16:28241267-28331934 |
| XLOC_021455 | RP11-297C4.6,SEPT1                                                                                       | 16:30378094-30400121 |
| XLOC_021493 | PYCARD                                                                                                   | 16:31199236-31227160 |
| XLOC_021607 | HMGN2P41                                                                                                 | 16:35802146-35803280 |
| XLOC_021683 | RP11-44F14.1,RP11-44F14.4                                                                                | 16:53362018-53373083 |
| XLOC_021706 | CES1                                                                                                     | 16:55802850-55833337 |
| XLOC_021732 | CCDC102A                                                                                                 | 16:57512177-57537132 |
| XLOC_021733 | GPR114                                                                                                   | 16:57542420-57607359 |
| XLOC_021735 | GPR56                                                                                                    | 16:57610651-57665741 |
| XLOC_021801 | NAE1                                                                                                     | 16:66802874-66873256 |
| XLOC_021818 | ATP6V0D1                                                                                                 | 16:67438013-67546973 |
| XLOC_021935 | MLKL                                                                                                     | 16:74671854-74701181 |
| XLOC_021988 | CDYL2                                                                                                    | 16:80597905-80804380 |
| XLOC_022031 | COTL1                                                                                                    | 16:84565488-84618077 |
| XLOC_022074 | KLHDC4,RP11-278A23.1                                                                                     | 16:87600525-87766163 |
| XLOC_022255 | P2RX1                                                                                                    | 17:3860314-3918577   |
| XLOC_022264 | SPNS2                                                                                                    | 17:4497393-4555631   |
| XLOC_022271 | ARRB2                                                                                                    | 17:4710365-4721720   |
| XLOC_022316 | ASGR2                                                                                                    | 17:7074479-7115700   |
| XLOC_022317 | RPL7AP64                                                                                                 | 17:7131257-7179564   |
| XLOC_022329 | NLGN2                                                                                                    | 17:7404840-7419860   |
| XLOC_022334 | CD68,EIF4A1,MPDU1,SENP3,SEN<br>P3-EIF4A1,SNORA48,SNORA67,S<br>NORD10,TNFSF12,TNFSF12-TNFS<br>F13,TNFSF13 | 17:7548483-7633383   |
| XLOC_022341 | KDM6B,TMEM88                                                                                             | 17:7834202-7856099   |
| XLOC_022343 | CHD3                                                                                                     | 17:7856683-7912960   |
| XLOC_022408 | HS3ST3B1                                                                                                 | 17:14301082-14349404 |
| XLOC_022450 | CCDC144A,NOS2P4,RP11-219A15.<br>1,RP11-219A15.2,RP11-219A15.4,U<br>SP32P1                                | 17:16689536-16816540 |
| XLOC_022494 | KRT16P4,LGALS9C                                                                                          | 17:18450243-18494945 |
| XLOC_022549 | CCDC144CP,SPECC1,USP32P3                                                                                 | 17:20009343-20433062 |
| XLOC_022616 | RP11-173M1.7,RP11-173M1.8,WSB<br>1                                                                       | 17:27294075-27348491 |



|             |                                              |                      |
|-------------|----------------------------------------------|----------------------|
| XLOC_022684 | CPD                                          | 17:30378904-30469989 |
| XLOC_022699 | ADAP2,RN7SL138P,RNF135,RP11-848P1.3          | 17:30831969-31000180 |
| XLOC_022726 | RHOT1                                        | 17:32141225-32253374 |
| XLOC_022769 | SLFN5                                        | 17:35223597-35273656 |
| XLOC_022792 | AC015849.16,RDM1                             | 17:35893706-35965472 |
| XLOC_022827 | DUSP14                                       | 17:37489830-37513501 |
| XLOC_022839 | CISD3,CTB-58E17.1,MLLT6                      | 17:38701680-38751457 |
| XLOC_022865 | ERBB2                                        | 17:39671121-39730787 |
| XLOC_022868 | IKZF3                                        | 17:39757519-39864624 |
| XLOC_022876 | THRA                                         | 17:40019096-40100767 |
| XLOC_022884 | RARA                                         | 17:40309191-40357833 |
| XLOC_022899 | -                                            | 17:41108245-41115819 |
| XLOC_022929 | ATP6V0A1,MIR5010,RP11-400F19.18              | 17:42458843-42522611 |
| XLOC_022987 | GRN                                          | 17:44345115-44353128 |
| XLOC_023048 | TBX21                                        | 17:47733192-47746652 |
| XLOC_023116 | ABCC3                                        | 17:50634626-50692252 |
| XLOC_023150 | PCTP                                         | 17:55750978-55872939 |
| XLOC_023157 | NOG                                          | 17:56593698-56595590 |
| XLOC_023164 | SCPEP1                                       | 17:56978104-57006768 |
| XLOC_023178 | DYNLL2,RP11-159D12.8                         | 17:58083392-58191948 |
| XLOC_023200 | YPEL2                                        | 17:59331617-59403303 |
| XLOC_023204 | CLTC,VMP1                                    | 17:59618552-59844367 |
| XLOC_023214 | CA4                                          | 17:60149935-60170899 |
| XLOC_023270 | MILR1                                        | 17:64449019-64474114 |
| XLOC_023285 | RGS9                                         | 17:65137374-65227703 |
| XLOC_023329 | ARSG,PRKAR1A,RP11-120M18.2                   | 17:68259181-68763882 |
| XLOC_023343 | KCNJ2                                        | 17:70163972-70180048 |
| XLOC_023364 | RPL38                                        | 17:74203317-74213342 |
| XLOC_023367 | KIF19                                        | 17:74326209-74355820 |
| XLOC_023375 | MIR3615,RAB37,SLC9A3R1                       | 17:74596985-74769360 |
| XLOC_023397 | LLGL2,TSEN54                                 | 17:75516059-75575208 |
| XLOC_023435 | SCARNA16,SEC14L1,SNHG20                      | 17:77086715-77217101 |
| XLOC_023436 | SEPT9                                        | 17:77257736-77500697 |
| XLOC_023448 | TMC8                                         | 17:77959256-78143110 |
| XLOC_023451 | SYNGR2                                       | 17:78168557-78207701 |
| XLOC_023453 | BIRC5                                        | 17:78214185-78225636 |
| XLOC_023478 | GAA                                          | 17:80101338-80119909 |
| XLOC_023489 | RPTOR                                        | 17:80544818-80971213 |
| XLOC_023530 | MIR6787,RP13-516M14.10,RP13-516M14.8,SLC16A3 | 17:82228396-82276189 |
| XLOC_023556 | RP11-1228E12.1                               | 17:64098-76866       |
| XLOC_023559 | DOC2B                                        | 17:142788-181636     |
| XLOC_023564 | FAM101B                                      | 17:439977-492206     |
| XLOC_023575 | YWHAE                                        | 17:1344271-1400378   |
| XLOC_023576 | CRK                                          | 17:1420688-1463162   |
| XLOC_023580 | SLC43A2                                      | 17:1567132-1632757   |
| XLOC_023582 | RILP,SCARF1                                  | 17:1633651-1650077   |
| XLOC_023585 | MIR22,MIR22HG                                | 17:1711492-1755273   |

|             |                                                  |                      |
|-------------|--------------------------------------------------|----------------------|
| XLOC_023628 | RP11-147K16.3,SPATA22,TRPV3                      | 17:3439922-3557995   |
| XLOC_023635 | CAMKK1,P2RX1                                     | 17:3860314-3918577   |
| XLOC_023648 | PELP1                                            | 17:4669256-4705529   |
| XLOC_023651 | CXCL16,RP11-314A20.5                             | 17:4731406-4746119   |
| XLOC_023669 | SCIMP                                            | 17:5192083-5248069   |
| XLOC_023692 | ASGR2,CLEC10A                                    | 17:7074479-7115700   |
| XLOC_023707 | ZBTB4                                            | 17:7459329-7484263   |
| XLOC_023733 | AURKB                                            | 17:8204732-8212228   |
| XLOC_023757 | GAS7                                             | 17:9910455-10198898  |
| XLOC_023798 | PMP22                                            | 17:15229776-15265707 |
| XLOC_023833 | TBC1D27,TNFRSF13B                                | 17:16922776-16972242 |
| XLOC_023863 | CCDC144B,CTD-2303H24.2,FAM106A,USP32P2           | 17:18510836-18625647 |
| XLOC_023865 | FOXO3B,RP11-815I9.3,RP11-815I9.4,TBC1D28,ZNF286B | 17:18635005-18682411 |
| XLOC_023994 | RAB34                                            | 17:28714262-28718429 |
| XLOC_024061 | CTD-2370N5.3,EVI2A,EVI2B                         | 17:31008153-31382116 |
| XLOC_024119 | RP11-1094M14.5,RP11-686D22.10,S                  | 17:35435095-35538497 |
|             | LFN12L,SLFN13,TOMM20P2                           |                      |
| XLOC_024130 | HEATR9                                           | 17:35568119-35885916 |
| XLOC_024132 | CCL5                                             | 17:35568119-35885916 |
| XLOC_024159 | SYNRG                                            | 17:37514796-37609496 |
| XLOC_024193 | PLXDC1                                           | 17:39057018-39154394 |
| XLOC_024207 | IKZF3,RP11-94L15.2                               | 17:39757519-39864624 |
| XLOC_024210 | GSDMB,ORMDL3                                     | 17:39904405-39939601 |
| XLOC_024222 | TOP2A                                            | 17:40388420-40417950 |
| XLOC_024228 | CCR7                                             | 17:40548316-40565509 |
| XLOC_024241 | KRT23                                            | 17:40921429-40975926 |
| XLOC_024291 | JUP                                              | 17:41754603-41786931 |
| XLOC_024292 | LEPREL4                                          | 17:41801946-41823217 |
| XLOC_024310 | STAT3                                            | 17:42313323-42388606 |
| XLOC_024327 | LINC00671                                        | 17:42865921-42898704 |
| XLOC_024332 | VAT1                                             | 17:43006645-43025123 |
| XLOC_024333 | BRCA1                                            | 17:43035594-43125483 |
| XLOC_024359 | DUSP3                                            | 17:43765513-43779025 |
| XLOC_024426 | WNT3                                             | 17:46762505-46833154 |
| XLOC_024444 | TBX21                                            | 17:47733192-47746652 |
| XLOC_024445 | OSBPL7                                           | 17:47807371-47821834 |
| XLOC_024463 | SKAP1                                            | 17:48103356-48430307 |
| XLOC_024525 | LRRC59                                           | 17:50373219-50397888 |
| XLOC_024567 | MIR3614,TRIM25                                   | 17:56791912-56914738 |
| XLOC_024579 | CUEDC1                                           | 17:57861242-57955352 |
| XLOC_024586 | MPO                                              | 17:58192736-58280935 |
| XLOC_024674 | CYB561,RP11-269G24.4                             | 17:62935401-63447173 |
| XLOC_024687 | ICAM2                                            | 17:63996070-64020634 |
| XLOC_024689 | TEX2                                             | 17:64147226-64263301 |
| XLOC_024691 | PECAM1                                           | 17:64319414-64413896 |
| XLOC_024710 | AXIN2,CEP112,CTD-2535L24.2                       | 17:65528562-66192084 |
| XLOC_024736 | FAM20A                                           | 17:68259181-68763882 |
| XLOC_024740 | ABCA6,ABCA9                                      | 17:68974487-69141888 |

|             |                                                           |                      |
|-------------|-----------------------------------------------------------|----------------------|
| XLOC_024767 | CDC42EP4                                                  | 17:73282830-73312175 |
| XLOC_024780 | CD300LB                                                   | 17:74519052-74546938 |
| XLOC_024781 | CD300C                                                    | 17:74519052-74546938 |
| XLOC_024803 | GRB2                                                      | 17:75318075-75405709 |
| XLOC_024816 | TRIM65                                                    | 17:75879867-75897021 |
| XLOC_024818 | ACOX1                                                     | 17:75941506-76027452 |
| XLOC_024860 | SOCS3                                                     | 17:78356777-78360077 |
| XLOC_024864 | CTD-2357A8.3                                              | 17:78617388-78632322 |
| XLOC_024865 | CYTH1                                                     | 17:78671576-78782356 |
| XLOC_024868 | USP36                                                     | 17:78787312-78841441 |
| XLOC_024870 | KIAA1731NL,TIMP2                                          | 17:78852485-78925387 |
| XLOC_024900 | BAIAP2-AS1                                                | 17:81029065-81034881 |
| XLOC_024901 | AATK                                                      | 17:81035121-81183164 |
| XLOC_024908 | LINC00482                                                 | 17:81302754-81309408 |
| XLOC_024913 | RP11-1055B8.4                                             | 17:81388125-81466332 |
| XLOC_024945 | -                                                         | 17:82217868-82220413 |
| XLOC_024962 | RAB40B                                                    | 17:82654972-82698728 |
| XLOC_025037 | -                                                         | 17:66301078-66302492 |
| XLOC_025055 | -                                                         | 17:77863895-77867395 |
| XLOC_025059 | -                                                         | 17:82221307-82222700 |
| XLOC_025092 | EMILIN2,RP11-737O24.5                                     | 18:2846474-3013367   |
| XLOC_025162 | RAB31                                                     | 18:9708164-9862716   |
| XLOC_025165 | VAPA                                                      | 18:9912315-10020287  |
| XLOC_025190 | IMPA2                                                     | 18:11981024-12033467 |
| XLOC_025227 | ANKRD20A5P,CYP4F35P,RHOT1P<br>1,RP11-757O6.1,RP11-757O6.6 | 18:14179096-14342525 |
| XLOC_025269 | RIOK3                                                     | 18:23452822-23486603 |
| XLOC_025350 | MAPRE2                                                    | 18:34976927-35143470 |
| XLOC_025393 | SIGLEC15                                                  | 18:45825511-45844818 |
| XLOC_025419 | CTIF,MIR4743                                              | 18:48539045-48863217 |
| XLOC_025456 | RAB27B                                                    | 18:54717859-54898083 |
| XLOC_025507 | PMAIP1                                                    | 18:59899947-59904306 |
| XLOC_025544 | SERPINB10,SERPINB2                                        | 18:63871691-63936111 |
| XLOC_025545 | HMSD,SERPINB8                                             | 18:63949300-64005667 |
| XLOC_025604 | TSHZ1                                                     | 18:75210623-75289991 |
| XLOC_025646 | KCNG2                                                     | 18:79792725-79900400 |
| XLOC_025667 | ENOSF1                                                    | 18:596987-712676     |
| XLOC_025668 | YES1                                                      | 18:721587-813756     |
| XLOC_025711 | ZBTB14                                                    | 18:5289018-5297053   |
| XLOC_025713 | EPB41L3                                                   | 18:5392380-5630700   |
| XLOC_025788 | RP11-973H7.1,RP11-973H7.4                                 | 18:12738964-12776351 |
| XLOC_025866 | RP11-535A5.1                                              | 18:22345239-22349482 |
| XLOC_025930 | DSC2                                                      | 18:31058839-31162979 |
| XLOC_026002 | PSTPIP2                                                   | 18:45983436-46072292 |
| XLOC_026007 | LOXHD1                                                    | 18:46326808-46657033 |
| XLOC_026034 | SMAD7                                                     | 18:48919852-48952043 |
| XLOC_026057 | MEX3C                                                     | 18:51174549-51218304 |
| XLOC_026135 | BCL2                                                      | 18:63123212-63320273 |
| XLOC_026167 | CD226,DOK6,RP11-543H23.2                                  | 18:69401054-69961803 |
| XLOC_026204 | ZNF516                                                    | 18:76357598-76498088 |

|             |                                              |                      |
|-------------|----------------------------------------------|----------------------|
| XLOC_026276 | GZMM                                         | 19:544033-549924     |
| XLOC_026277 | -                                            | 19:550278-551744     |
| XLOC_026284 | FSTL3                                        | 19:676364-683408     |
| XLOC_026291 | AZU1                                         | 19:825096-832050     |
| XLOC_026292 | PRTN3                                        | 19:840959-848175     |
| XLOC_026293 | ELANE                                        | 19:851013-856247     |
| XLOC_026298 | ARID3A                                       | 19:925744-976093     |
| XLOC_026312 | MIDN                                         | 19:1248501-1259305   |
| XLOC_026346 | GADD45B                                      | 19:2476121-2478259   |
| XLOC_026360 | GNA15                                        | 19:3136192-3163802   |
| XLOC_026373 | AC005954.4,TJP3                              | 19:3708108-3761703   |
| XLOC_026375 | MATK                                         | 19:3777855-3802129   |
| XLOC_026390 | FSD1                                         | 19:4304159-4323843   |
| XLOC_026401 | SEMA6B                                       | 19:4542057-4559808   |
| XLOC_026438 | TNFSF9                                       | 19:6530998-6535928   |
| XLOC_026443 | EMR1                                         | 19:6887529-6942813   |
| XLOC_026456 | RETN                                         | 19:7655875-7670463   |
| XLOC_026458 | CTD-3214H19.16,MCEMP1,TRAPP<br>C5            | 19:7676627-7688051   |
| XLOC_026501 | CTC-325H20.2,ZNF177,ZNF559,ZN<br>F559-ZNF177 | 19:9323771-9383221   |
| XLOC_026530 | ICAM1                                        | 19:10251900-10289019 |
| XLOC_026541 | QTRT1                                        | 19:10701420-10713437 |
| XLOC_026546 | C19orf38                                     | 19:10717900-10869790 |
| XLOC_026579 | ZNF788                                       | 19:12092262-12156751 |
| XLOC_026602 | JUNB                                         | 19:12763002-12874951 |
| XLOC_026668 | CYP4F22                                      | 19:15508414-15552325 |
| XLOC_026671 | CYP4F3,CYP4F8                                | 19:15615217-15662825 |
| XLOC_026723 | COLGALT1                                     | 19:17554061-17586372 |
| XLOC_026731 | RPL18A,SNORA68                               | 19:17859875-17864153 |
| XLOC_026742 | IFI30,PIK3R2                                 | 19:18152872-18178118 |
| XLOC_026746 | LSM4                                         | 19:18303448-18323274 |
| XLOC_026769 | SLC25A42                                     | 19:19063998-19112953 |
| XLOC_026899 | PLEKHF1                                      | 19:29665055-29675478 |
| XLOC_026904 | URI1                                         | 19:29923643-30016750 |
| XLOC_026924 | ZNF507                                       | 19:32345593-32387800 |
| XLOC_026925 | DPY19L3                                      | 19:32390049-32485895 |
| XLOC_026961 | ZNF181                                       | 19:34734084-34745378 |
| XLOC_026966 | ZNF30                                        | 19:34923298-34945303 |
| XLOC_026984 | FFAR2                                        | 19:35443906-35452360 |
| XLOC_026988 | HAUS5                                        | 19:35612743-35625907 |
| XLOC_027001 | LRFN3                                        | 19:35935357-35945767 |
| XLOC_027028 | ZNF420                                       | 19:37007856-37249046 |
| XLOC_027032 | HKR1                                         | 19:37312836-37369365 |
| XLOC_027082 | ZFP36                                        | 19:39400916-39409719 |
| XLOC_027115 | LTBP4                                        | 19:40592882-40629818 |
| XLOC_027136 | AC005795.1                                   | 19:41506151-41506898 |
| XLOC_027141 | CEACAM3                                      | 19:41796427-41812121 |
| XLOC_027148 | ZNF574                                       | 19:41998320-42081565 |
| XLOC_027163 | CD177                                        | 19:43353508-43368970 |

|             |                                                                                               |                      |
|-------------|-----------------------------------------------------------------------------------------------|----------------------|
| XLOC_027196 | BCL3,MIR8085                                                                                  | 19:44747704-44760188 |
| XLOC_027218 | PPM1N                                                                                         | 19:45485288-45503364 |
| XLOC_027219 | VASP                                                                                          | 19:45506240-45602212 |
| XLOC_027222 | GIPR                                                                                          | 19:45668189-45683882 |
| XLOC_027259 | C5AR1                                                                                         | 19:47290022-47322069 |
| XLOC_027260 | C5AR2,DHX34                                                                                   | 19:47332146-47382715 |
| XLOC_027292 | PPP1R15A                                                                                      | 19:48872391-48876278 |
| XLOC_027296 | CTD-2639E6.9,FTL                                                                              | 19:48963444-48967908 |
| XLOC_027317 | ALDH16A1,CTD-3148I10.15,CTD-3148I10.9,FLT3LG,RPL13A,SNORD32A,SNORD33,SNORD34,SNORD35A         | 19:49446202-49492308 |
| XLOC_027319 | FCGRT,RCN3                                                                                    | 19:49506815-49546962 |
| XLOC_027324 | ADM5,MIR5088,PRMT1                                                                            | 19:49675785-49690575 |
| XLOC_027347 | CLEC11A                                                                                       | 19:50723328-50725718 |
| XLOC_027360 | CTD-3187F8.15,SIGLEC18P,SIGLEC7,SIGLEC9                                                       | 19:51119986-51181966 |
| XLOC_027372 | CTD-2616J11.14,CTD-2616J11.2,CTD-2616J11.3,LIM2                                               | 19:51379908-51420324 |
| XLOC_027386 | FPR1,FPR2                                                                                     | 19:51740744-51826189 |
| XLOC_027503 | LILRA5                                                                                        | 19:54300425-54339356 |
| XLOC_027516 | AC009892.9,AC011515.2,CTB-83J4.2,LILRA1,LILRA2,LILRB1,LILRB4,LILRP1,VN1R105P                  | 19:54572917-54700954 |
| XLOC_027526 | CTB-61M7.1,KIR2DL1,KIR2DL3,KIR2DL4,KIR2DP1,KIR2DS4,KIR3DL1,KIR3DL2,KIR3DL3,KIR3DP1            | 19:54724456-54867542 |
| XLOC_027527 | CTB-61M7.2,FCAR                                                                               | 19:54874163-54898135 |
| XLOC_027528 | NCR1                                                                                          | 19:54905896-54920010 |
| XLOC_027592 | AC003002.4,AC003002.6,AC003005.4,AC004076.7,TRAPPC2B,ZNF17,ZNF419,ZNF547,ZNF548,ZNF749,ZNF773 | 19:57363443-57518480 |
| XLOC_027629 | RPS5                                                                                          | 19:58384654-58394823 |
| XLOC_027638 | TRIM28                                                                                        | 19:58544069-58550722 |
| XLOC_027647 | AC098474.1,LINC01002                                                                          | 19:197954-246515     |
| XLOC_027679 | SBNO2                                                                                         | 19:1107635-1174291   |
| XLOC_027688 | PCSK4                                                                                         | 19:1481427-1497927   |
| XLOC_027699 | ABHD17A                                                                                       | 19:1876809-1885682   |
| XLOC_027735 | TLE2                                                                                          | 19:2997637-3047635   |
| XLOC_027736 | AES                                                                                           | 19:3052909-3063118   |
| XLOC_027740 | -                                                                                             | 19:3164111-3170582   |
| XLOC_027745 | NFIC                                                                                          | 19:3359562-3469247   |
| XLOC_027759 | MATK                                                                                          | 19:3777855-3802129   |
| XLOC_027771 | TMIGD2                                                                                        | 19:4292231-4302431   |
| XLOC_027781 | CTB-50L17.14,LRG1,PLIN5                                                                       | 19:4518273-4541821   |
| XLOC_027782 | SEMA6B                                                                                        | 19:4542057-4559808   |
| XLOC_027790 | PLIN3,UHRF1                                                                                   | 19:4838307-5153616   |
| XLOC_027794 | PTPRS                                                                                         | 19:5158494-5340803   |
| XLOC_027817 | DENND1C                                                                                       | 19:6436078-6482557   |

|             |                                                  |                      |
|-------------|--------------------------------------------------|----------------------|
| XLOC_027818 | TUBB4A                                           | 19:6494318-6502848   |
| XLOC_027827 | CTD-3128G10.6,SH2D3A                             | 19:6737924-6767659   |
| XLOC_027835 | INSR                                             | 19:7112254-7294341   |
| XLOC_027865 | PRAM1                                            | 19:8490015-8504674   |
| XLOC_027867 | MYO1F                                            | 19:8517341-8577577   |
| XLOC_027869 | ADAMTS10                                         | 19:8580025-8610745   |
| XLOC_027904 | OLFM2                                            | 19:9853717-9936552   |
| XLOC_027917 | S1PR5                                            | 19:10512485-10517931 |
| XLOC_027919 | KRI1                                             | 19:10543720-10566110 |
| XLOC_027943 | ZNF823                                           | 19:11721212-11739009 |
| XLOC_027992 | CTD-3252C9.4,MIR23A,MIR24-2,MIR27A               | 19:13780069-13842906 |
| XLOC_028001 | PRKACA                                           | 19:14087839-14118084 |
| XLOC_028009 | GIPC1                                            | 19:14477759-14496324 |
| XLOC_028012 | EMR3                                             | 19:14583083-14778541 |
| XLOC_028014 | EMR2                                             | 19:14583083-14778541 |
| XLOC_028027 | NOTCH3                                           | 19:15159037-15200981 |
| XLOC_028037 | RASAL3                                           | 19:15450101-15465808 |
| XLOC_028109 | LRRC25                                           | 19:18389610-18398527 |
| XLOC_028110 | ISYNA1                                           | 19:18418543-18522127 |
| XLOC_028135 | PBX4                                             | 19:19561668-19618916 |
| XLOC_028160 | CTC-513N18.7,CTD-2542C24.3,ZNF626,ZNF737,ZNF826P | 19:20340268-20863281 |
| XLOC_028222 | ZNF91                                            | 19:23304990-23395560 |
| XLOC_028261 | C19orf12                                         | 19:29691981-29715789 |
| XLOC_028268 | TSHZ3                                            | 19:31242777-31417794 |
| XLOC_028290 | CEP89,CTD-2085J24.4                              | 19:32875870-32972020 |
| XLOC_028295 | CEBPA                                            | 19:33299804-33302581 |
| XLOC_028313 | CTC-523E23.1,CTC-523E23.11,CTC-523E23.4,ZNF599   | 19:34757478-34860684 |
| XLOC_028320 | ZNF792                                           | 19:34955518-34964396 |
| XLOC_028339 | DMKN                                             | 19:35497219-35513658 |
| XLOC_028393 | CTD-2528L19.4,ZFP30,ZNF607,ZNF781                | 19:37497158-37719790 |
| XLOC_028406 | RASGRP4                                          | 19:38403104-38426305 |
| XLOC_028431 | RPS16                                            | 19:39433142-39435948 |
| XLOC_028437 | CLC                                              | 19:39731249-39738369 |
| XLOC_028439 | DYRK1B,FBL                                       | 19:39825349-39846415 |
| XLOC_028441 | FCGBP                                            | 19:39854456-39953459 |
| XLOC_028459 | BLVRB                                            | 19:40447788-40465840 |
| XLOC_028484 | AC011513.4,CEACAM4                               | 19:41545191-41786893 |
| XLOC_028492 | ATP1A3                                           | 19:41966581-41997497 |
| XLOC_028503 | CEACAM1                                          | 19:42397127-43207299 |
| XLOC_028505 | CEACAM8,PSG3                                     | 19:42397127-43207299 |
| XLOC_028527 | PLAUR                                            | 19:43645641-43695034 |
| XLOC_028553 | BCL3                                             | 19:44747704-44760188 |
| XLOC_028577 | AC011530.4,DMPK,DMWD                             | 19:45764784-45792864 |
| XLOC_028580 | IRF2BP1                                          | 19:45883606-45886170 |
| XLOC_028584 | PGLYRP1                                          | 19:45995443-46030161 |
| XLOC_028692 | NOSIP                                            | 19:49555178-49628266 |

|             |                                                  |                      |
|-------------|--------------------------------------------------|----------------------|
| XLOC_028747 | CLDND2,CTD-2616J11.11,ETFB,N<br>KG7              | 19:51345152-51373869 |
| XLOC_028754 | SIGLEC12                                         | 19:51491216-51501789 |
| XLOC_028763 | FPR1                                             | 19:51740744-51826189 |
| XLOC_028815 | NLRP12                                           | 19:53630887-53991601 |
| XLOC_028818 | VSTM1                                            | 19:54040824-54063999 |
| XLOC_028819 | TARM1                                            | 19:54069381-54081445 |
| XLOC_028820 | OSCAR                                            | 19:54094626-54131719 |
| XLOC_028824 | MBOAT7                                           | 19:54173411-54194536 |
| XLOC_028827 | LILRA6,LILRB2,LILRB3                             | 19:54200741-54281212 |
| XLOC_028834 | AC008984.2,AC008984.6,LILRA4,L<br>ILRA5,VN1R104P | 19:54300425-54339356 |
| XLOC_028847 | NCR1                                             | 19:54905896-54920010 |
| XLOC_028854 | TNNT1                                            | 19:55132777-55149354 |
| XLOC_028921 | ZNF550                                           | 19:57527324-57559941 |
| XLOC_028936 | ZNF329                                           | 19:58126251-58155110 |
| XLOC_028992 | -                                                | 19:44746004-44747470 |
| XLOC_029042 | RNF144A                                          | 2:6912276-7077880    |
| XLOC_029071 | C2orf48,RRM2                                     | 2:10122327-10212792  |
| XLOC_029096 | LPIN1                                            | 2:11677594-11827560  |
| XLOC_029103 | TRIB2                                            | 2:12716888-12742739  |
| XLOC_029146 | RHOB                                             | 2:20447073-20449445  |
| XLOC_029188 | RAB10                                            | 2:26033822-26138968  |
| XLOC_029199 | CENPA,SLC35F6                                    | 2:26764253-26801067  |
| XLOC_029232 | PLB1                                             | 2:28457144-28664540  |
| XLOC_029239 | FAM179A                                          | 2:28956610-29074261  |
| XLOC_029244 | YPEL5                                            | 2:30146940-30160557  |
| XLOC_029247 | LBH                                              | 2:30231530-30323730  |
| XLOC_029296 | VIT                                              | 2:36696689-36814792  |
| XLOC_029303 | QPCT                                             | 2:37344573-37373322  |
| XLOC_029307 | CYP1B1-AS1,RMDN2                                 | 2:37923170-38181855  |
| XLOC_029313 | RPLP0P6                                          | 2:38406718-38515740  |
| XLOC_029323 | SLC8A1-AS1                                       | 2:39786452-40611053  |
| XLOC_029371 | RHOQ                                             | 2:46490749-46684746  |
| XLOC_029384 | MSH2                                             | 2:47402968-47570939  |
| XLOC_029422 | RPS27A                                           | 2:55172600-55271145  |
| XLOC_029438 | EIF3FP3                                          | 2:58251439-58252525  |
| XLOC_029491 | LGALSL                                           | 2:64453968-64461381  |
| XLOC_029506 | ACTR2                                            | 2:65227752-65271253  |
| XLOC_029529 | ARHGAP25                                         | 2:68679600-68826852  |
| XLOC_029541 | MXD1,SNRNP27                                     | 2:69893559-69942963  |
| XLOC_029567 | NAGK                                             | 2:70935881-71081674  |
| XLOC_029572 | DYSF                                             | 2:71452783-71686815  |
| XLOC_029594 | AC073046.25,TET3                                 | 2:73984787-74108176  |
| XLOC_029603 | WDR54                                            | 2:74421677-74442422  |
| XLOC_029610 | SEMA4F                                           | 2:74654227-74693172  |
| XLOC_029613 | HK2                                              | 2:74832654-74893463  |
| XLOC_029678 | GNLY                                             | 2:85685143-85700539  |
| XLOC_029687 | KDM3A                                            | 2:86440646-86492821  |
| XLOC_029788 | MAL                                              | 2:95023448-95077047  |

|             |                         |                       |
|-------------|-------------------------|-----------------------|
| XLOC_029815 | ITPRIPL1                | 2:96324887-96330805   |
| XLOC_029830 | ANKRD36                 | 2:97113115-97265736   |
| XLOC_029845 | ZAP70                   | 2:97712321-97996374   |
| XLOC_029880 | -                       | 2:101962065-101988700 |
| XLOC_029881 | IL1R2                   | 2:101991811-102028544 |
| XLOC_029882 | IL1R1                   | 2:102064543-102182108 |
| XLOC_029886 | AC007278.3,IL18RAP      | 2:102418412-102452569 |
| XLOC_029926 | CD8BP                   | 2:106487092-106507437 |
| XLOC_029947 | LIMS1                   | 2:108534354-108687353 |
| XLOC_029954 | SOWAHC                  | 2:109614333-109618990 |
| XLOC_029985 | MERTK                   | 2:111898445-112029561 |
| XLOC_029994 | POLR1B                  | 2:112541900-112581467 |
| XLOC_030009 | IL1RN                   | 2:113107213-113134197 |
| XLOC_030046 | STEAP3                  | 2:119223681-119266165 |
| XLOC_030053 | PTPN4                   | 2:119759630-119986876 |
| XLOC_030062 | RALB                    | 2:120240063-120294716 |
| XLOC_030136 | PTPN18                  | 2:130352178-130378557 |
| XLOC_030202 | HNMT                    | 2:137964019-138016769 |
| XLOC_030207 | AC092620.2,SPOPL        | 2:138501800-138574458 |
| XLOC_030223 | KYNU                    | 2:142877497-143055992 |
| XLOC_030249 | KIF5C                   | 2:148866469-149026759 |
| XLOC_030261 | TNFAIP6                 | 2:151357591-151380048 |
| XLOC_030286 | GPD2                    | 2:156435289-156613735 |
| XLOC_030312 | TANK                    | 2:161096230-161254668 |
| XLOC_030317 | AC009487.5,SLC4A10,TBR1 | 2:161416093-161985282 |
| XLOC_030328 | GCA                     | 2:162265582-162838730 |
| XLOC_030351 | CERS6                   | 2:168455861-168913371 |
| XLOC_030378 | CYBRD1                  | 2:171522246-171558133 |
| XLOC_030387 | ITGA6                   | 2:172427353-172624111 |
| XLOC_030393 | PK                      | 2:173075434-173282036 |
| XLOC_030472 | SSFA2                   | 2:181887850-181930822 |
| XLOC_030485 | ZNF804A                 | 2:184591879-184939492 |
| XLOC_030611 | NOP58,SNORD70           | 2:202265715-202303670 |
| XLOC_030633 | CD28                    | 2:203706474-203778703 |
| XLOC_030636 | ICOS                    | 2:203936634-203967940 |
| XLOC_030678 | PTH2R                   | 2:208359713-208854503 |
| XLOC_030683 | MAP2                    | 2:209424057-209734118 |
| XLOC_030703 | SPAG16                  | 2:213284378-214684246 |
| XLOC_030731 | IGFBP2                  | 2:216632827-216664436 |
| XLOC_030755 | CTDSP1,SLC11A1          | 2:218381687-218406424 |
| XLOC_030764 | CYP27A1,RP11-459I19.1   | 2:218781492-218832086 |
| XLOC_030776 | DNAJB2                  | 2:219279266-219286900 |
| XLOC_030788 | SLC4A3                  | 2:219627326-219641980 |
| XLOC_030831 | AGFG1,MIR5703           | 2:227472130-227561417 |
| XLOC_030854 | ITM2C                   | 2:230864638-230879248 |
| XLOC_030896 | ATG16L1                 | 2:233210050-233295674 |
| XLOC_030919 | ARL4C                   | 2:234476111-234497153 |
| XLOC_030923 | AGAP1                   | 2:235494088-236131800 |
| XLOC_030941 | LRRFIP1,RBM44           | 2:237627575-237842808 |
| XLOC_030978 | ANO7                    | 2:241188508-241225377 |



|             |                            |                       |
|-------------|----------------------------|-----------------------|
| XLOC_030983 | BOK                        | 2:241544402-241581082 |
| XLOC_031065 | LINC00298,LINC00299        | 2:7922424-8488338     |
| XLOC_031071 | MBOAT2                     | 2:8852628-9003880     |
| XLOC_031128 | FAM49A                     | 2:16549418-16666331   |
| XLOC_031142 | WDR35                      | 2:19910259-20012694   |
| XLOC_031144 | LAPTM4A                    | 2:20032649-20052028   |
| XLOC_031258 | FAM179A                    | 2:28956610-29074261   |
| XLOC_031269 | GALNT14                    | 2:30910466-31155202   |
| XLOC_031282 | NLRC4                      | 2:32165840-32265864   |
| XLOC_031319 | CDC42EP3                   | 2:37599898-37738468   |
| XLOC_031321 | CYP1B1,RMDN2-AS1           | 2:37923170-38181855   |
| XLOC_031331 | DHX57                      | 2:38797728-38875934   |
| XLOC_031345 | SLC8A1                     | 2:39786452-40611053   |
| XLOC_031399 | C2orf61,CALM2,RP11-761B3.1 | 2:46899274-47176601   |
| XLOC_031445 | RTN4                       | 2:54723498-55112621   |
| XLOC_031452 | CCDC88A                    | 2:55287683-55420172   |
| XLOC_031526 | PELI1                      | 2:64092651-64257611   |
| XLOC_031546 | AC012370.2,SPRED2          | 2:65310850-65432637   |
| XLOC_031588 | MXD1                       | 2:69893559-69942963   |
| XLOC_031598 | TGFA                       | 2:70447254-70554193   |
| XLOC_031603 | CLEC4F                     | 2:70808531-70820660   |
| XLOC_031612 | PAIP2B                     | 2:71182384-71227095   |
| XLOC_031634 | MOB1A                      | 2:74152527-74178898   |
| XLOC_031640 | RTKN                       | 2:74421677-74442422   |
| XLOC_031646 | M1AP                       | 2:74557882-74648338   |
| XLOC_031715 | CAPG                       | 2:85394747-85418432   |
| XLOC_031740 | CD8A,CD8B                  | 2:86784568-87076719   |
| XLOC_031776 | IGKV3-20                   | 2:89142569-89143160   |
| XLOC_031785 | IGKV2-29                   | 2:89229768-89235009   |
| XLOC_031862 | SEMA4C                     | 2:96859533-96873879   |
| XLOC_031895 | CHST10                     | 2:100391859-100417656 |
| XLOC_031958 | EDAR                       | 2:108894470-108989372 |
| XLOC_031965 | SEPT10                     | 2:109542981-109614270 |
| XLOC_031995 | MERTK                      | 2:111898445-112029561 |
| XLOC_031996 | MERTK                      | 2:111898445-112029561 |
| XLOC_032006 | IL1B                       | 2:112829750-112836903 |
| XLOC_032077 | BIN1                       | 2:127048022-127107355 |
| XLOC_032085 | LIMS2                      | 2:127638380-127681786 |
| XLOC_032121 | CYP4F62P,FAR2P2            | 2:130416446-130441413 |
| XLOC_032195 | CXCR4                      | 2:136114348-136118165 |
| XLOC_032238 | RP11-107E5.2,ZEB2          | 2:144383826-144525011 |
| XLOC_032274 | NMI                        | 2:151270464-151290057 |
| XLOC_032308 | ACVR1C                     | 2:157526766-157629005 |
| XLOC_032325 | CD302,LY75,LY75-CD302      | 2:159670707-159904749 |
| XLOC_032340 | SLC4A10                    | 2:161416093-161985282 |
| XLOC_032341 | DPP4                       | 2:161989410-162075169 |
| XLOC_032347 | GCA                        | 2:162265582-162838730 |
| XLOC_032353 | COBLL1                     | 2:164653623-164849334 |
| XLOC_032371 | STK39                      | 2:167954019-168248141 |
| XLOC_032428 | RNU6-5P,WIPF1              | 2:174522826-174774827 |

|             |                                          |                       |
|-------------|------------------------------------------|-----------------------|
| XLOC_032475 | SESTD1                                   | 2:179101691-179264843 |
| XLOC_032503 | ZNF804A                                  | 2:184591879-184939492 |
| XLOC_032532 | SLC40A1                                  | 2:189560578-189583758 |
| XLOC_032548 | STAT4                                    | 2:191021525-191151596 |
| XLOC_032571 | STK17B                                   | 2:195575976-196176503 |
| XLOC_032672 | KLF7                                     | 2:207074136-207167338 |
| XLOC_032681 | FZD5                                     | 2:207762585-207769563 |
| XLOC_032696 | IDH1                                     | 2:208236226-208266074 |
| XLOC_032708 | LANCL1                                   | 2:210324758-210477652 |
| XLOC_032714 | IKZF2                                    | 2:212581356-213154188 |
| XLOC_032789 | CHPF                                     | 2:219538946-219550595 |
| XLOC_032801 | EPHA4                                    | 2:221418026-221574454 |
| XLOC_032832 | IRS1                                     | 2:226731316-226799846 |
| XLOC_032874 | NMUR1                                    | 2:231501371-231530634 |
| XLOC_032902 | HJURP                                    | 2:233775678-233854566 |
| XLOC_032909 | ARLAC                                    | 2:234476111-234497153 |
| XLOC_032975 | AC104809.4                               | 2:240906329-240993311 |
| XLOC_033171 | -                                        | 2:130349982-130351710 |
| XLOC_033229 | -                                        | 2:227564313-227568717 |
| XLOC_033241 | -                                        | 2:239501173-239505850 |
| XLOC_033242 | -                                        | 2:239506059-239507581 |
| XLOC_033268 | RAD21L1,SNPH                             | 20:1226055-1309328    |
| XLOC_033271 | AL109658.1                               | 20:1441585-1497537    |
| XLOC_033277 | SIRPA                                    | 20:1888127-1940592    |
| XLOC_033287 | EBF4                                     | 20:2692877-2760108    |
| XLOC_033304 | AP5S1,CDC25B,RP5-1009E24.8,RP5-1009E24.9 | 20:3786771-3829968    |
| XLOC_033308 | FTLP3                                    | 20:4023916-4024444    |
| XLOC_033354 | ANKEF1,RP5-839B4.8                       | 20:9986087-10368776   |
| XLOC_033416 | RIN2,RP1-122P22.2,RP5-999L4.2            | 20:19756389-20002457  |
| XLOC_033428 | XRN2                                     | 20:21302730-21389827  |
| XLOC_033461 | APMAP,CST7                               | 20:24948939-24992979  |
| XLOC_033503 | HM13,MCTS2P                              | 20:31514427-31577923  |
| XLOC_033507 | ID1                                      | 20:31605282-31606515  |
| XLOC_033511 | TPX2                                     | 20:31739263-31801805  |
| XLOC_033520 | HCK                                      | 20:32051486-32103886  |
| XLOC_033556 | CHMP4B                                   | 20:33811303-33854366  |
| XLOC_033573 | PROCR                                    | 20:35170948-35177403  |
| XLOC_033582 | CEP250                                   | 20:35455163-35533998  |
| XLOC_033602 | C20orf24,TGIF2,TGIF2-C20orf24            | 20:36306335-36646375  |
| XLOC_033624 | BPI                                      | 20:38210487-38337505  |
| XLOC_033636 | PPP1R16B                                 | 20:38805704-38923024  |
| XLOC_033649 | MIR6871,PLCG1,RPL23AP81                  | 20:41028817-41317672  |
| XLOC_033674 | OSER1-AS1                                | 20:44210927-44226129  |
| XLOC_033693 | -                                        | 20:45179843-45192932  |
| XLOC_033711 | DNTTIP1                                  | 20:45791936-45811429  |
| XLOC_033716 | CTSA                                     | 20:45881036-45912178  |
| XLOC_033719 | MMP9                                     | 20:46008907-46060150  |
| XLOC_033762 | SNAI1                                    | 20:49982998-49988886  |
| XLOC_033765 | CEBPB,LINC01273                          | 20:50172549-50193517  |

|             |                                                                  |                      |
|-------------|------------------------------------------------------------------|----------------------|
| XLOC_033767 | LINC01272                                                        | 20:50264210-50290458 |
| XLOC_033768 | LINC01270                                                        | 20:50292719-50321342 |
| XLOC_033802 | -                                                                | 20:53845440-53853598 |
| XLOC_033808 | RPL12P4                                                          | 20:55074567-55075222 |
| XLOC_033862 | RP3-492J12.2,ZNF831                                              | 20:59123400-59259268 |
| XLOC_033882 | RPS21                                                            | 20:62302067-62388520 |
| XLOC_033894 | COL9A3                                                           | 20:62816243-62861763 |
| XLOC_033919 | LIME1,RP4-583P15.10,RP4-583P15.14,RP4-583P15.15,SLC2A4RG,ZGPAT   | 20:63657809-63831244 |
| XLOC_033922 | TPD52L2                                                          | 20:63865227-63891762 |
| XLOC_033923 | AL118506.1,AL118506.2,DNAJC5,MIR941-1,MIR941-2,MIR941-3,MIR941-4 | 20:63895075-63936554 |
| XLOC_033942 | RP5-850E9.3,SCRT2,SRXN1                                          | 20:646614-676179     |
| XLOC_033949 | FKBP1A,MIR6869,RP11-314N13.10,SDCBP2                             | 20:1309908-1393172   |
| XLOC_033950 | NSFL1C,SIRPB2                                                    | 20:1441585-1497537   |
| XLOC_033951 | RP4-576H24.2,RP4-576H24.4,SIRPB1,SIRPD,SIRPG                     | 20:1516758-1657826   |
| XLOC_033986 | RNF24,RP4-681N20.5                                               | 20:3887281-4015744   |
| XLOC_033995 | RASSF2                                                           | 20:4776288-4825071   |
| XLOC_034012 | GPCPD1                                                           | 20:5544328-5611049   |
| XLOC_034043 | JAG1                                                             | 20:10637556-10994924 |
| XLOC_034091 | BFSP1                                                            | 20:17493904-17569220 |
| XLOC_034161 | THBD                                                             | 20:23045632-23049741 |
| XLOC_034163 | CD93                                                             | 20:23077644-23090136 |
| XLOC_034195 | ACSS1                                                            | 20:25006126-25058980 |
| XLOC_034209 | ZNF337                                                           | 20:25612934-25696846 |
| XLOC_034253 | HCK                                                              | 20:32051486-32103886 |
| XLOC_034256 | PLAGL2,TSPY26P                                                   | 20:32186476-32207791 |
| XLOC_034259 | NOL4L                                                            | 20:32443009-32608893 |
| XLOC_034335 | SOGA1                                                            | 20:36777440-36863686 |
| XLOC_034336 | SAMHD1                                                           | 20:36876120-36951843 |
| XLOC_034371 | MAFB                                                             | 20:40685847-40689240 |
| XLOC_034406 | ADA                                                              | 20:44531784-44652233 |
| XLOC_034407 | KCNK15-AS1,LINC01260                                             | 20:44656294-44810338 |
| XLOC_034416 | SLPI                                                             | 20:45252238-45254564 |
| XLOC_034447 | NCOA5                                                            | 20:46060984-46089989 |
| XLOC_034482 | B4GALT5                                                          | 20:49363876-49713878 |
| XLOC_034508 | ATP9A,NFATC2                                                     | 20:51386956-51768634 |
| XLOC_034568 | CTSZ                                                             | 20:58981207-59007981 |
| XLOC_034600 | WI2-87327B8.2                                                    | 20:62596202-62605680 |
| XLOC_034629 | STMN3                                                            | 20:63639488-63653427 |
| XLOC_034636 | TPD52L2                                                          | 20:63865227-63891762 |
| XLOC_034652 | RP5-968J1.1                                                      | 20:1804015-1817606   |
| XLOC_034656 | -                                                                | 20:1880065-1883245   |
| XLOC_034684 | -                                                                | 20:53853672-53858822 |
| XLOC_034691 | -                                                                | 20:63850490-63854598 |
| XLOC_034804 | CYP4F29P                                                         | 21:13843132-13980437 |

|             |                                                                |                      |
|-------------|----------------------------------------------------------------|----------------------|
| XLOC_034846 | PPIAP2                                                         | 21:18857778-18858276 |
| XLOC_034904 | AP000240.9,BACH1,BACH1-IT1,BACH1-IT2,GAPDHP14,LINC00189        | 21:29182026-29940033 |
| XLOC_034931 | EVA1C                                                          | 21:32411123-32515533 |
| XLOC_034948 | IFNGR2                                                         | 21:33402895-33480011 |
| XLOC_034958 | KCNE1                                                          | 21:34418714-34512337 |
| XLOC_034986 | TTC3                                                           | 21:37059169-37203112 |
| XLOC_034992 | DSCR8,KCNJ15                                                   | 21:38121450-38307357 |
| XLOC_034995 | ETS2                                                           | 21:38805306-38824968 |
| XLOC_035034 | ABCG1                                                          | 21:42199688-42304387 |
| XLOC_035036 | UBASH3A                                                        | 21:42403649-42448557 |
| XLOC_035039 | PDE9A                                                          | 21:42653635-42775528 |
| XLOC_035049 | RRP1B                                                          | 21:43659542-43696188 |
| XLOC_035065 | TRPM2,snoZ6                                                    | 21:44350069-44443081 |
| XLOC_035098 | COL6A1                                                         | 21:45981736-46005050 |
| XLOC_035102 | COL6A2                                                         | 21:46098096-46132849 |
| XLOC_035111 | DIP2A                                                          | 21:46458881-46581732 |
| XLOC_035179 | ANKRD20A11P,CYP4F29P,RHOT1P2                                   | 21:13843132-13980437 |
| XLOC_035186 | SAMSN1                                                         | 21:14485227-14658821 |
| XLOC_035190 | AF127936.7                                                     | 21:14818842-14902950 |
| XLOC_035192 | NRIP1                                                          | 21:14961229-15065897 |
| XLOC_035213 | C21orf91,C21orf91-OT1                                          | 21:17763314-17819402 |
| XLOC_035264 | APP                                                            | 21:25880549-26217381 |
| XLOC_035268 | CYYR1                                                          | 21:26378551-26573284 |
| XLOC_035269 | ADAMTS1                                                        | 21:26835746-26845409 |
| XLOC_035276 | AF131217.1,N6AMT1                                              | 21:28439345-28885602 |
| XLOC_035365 | AP000322.53,KCNE1                                              | 21:34418714-34512337 |
| XLOC_035402 | ERG                                                            | 21:38380026-38661780 |
| XLOC_035443 | TMPRSS3                                                        | 21:42371889-42396846 |
| XLOC_035458 | U2AF1                                                          | 21:43092955-43107711 |
| XLOC_035499 | PTTG1IP                                                        | 21:44849573-44875794 |
| XLOC_035515 | SLC19A1                                                        | 21:45405136-45544411 |
| XLOC_035523 | LSS                                                            | 21:46185078-46228824 |
| XLOC_035529 | S100B                                                          | 21:46598961-46605208 |
| XLOC_035572 | -                                                              | 21:46584702-46593824 |
| XLOC_035613 | IL17RA                                                         | 22:17084953-17115733 |
| XLOC_035674 | ZNF74                                                          | 22:20394114-20413657 |
| XLOC_035733 | IGLV8-61                                                       | 22:22098699-22099212 |
| XLOC_035753 | IGLV9-49                                                       | 22:22343186-22343732 |
| XLOC_035758 | IGLV7-46                                                       | 22:22369468-22370499 |
| XLOC_035766 | IGLV1-40                                                       | 22:22409755-22410307 |
| XLOC_035825 | BCR                                                            | 22:23179703-23318078 |
| XLOC_035861 | SGSM1                                                          | 22:24806168-24927578 |
| XLOC_035862 | KIAA1671                                                       | 22:24952672-25197712 |
| XLOC_035874 | ADRBK2                                                         | 22:25564645-25729294 |
| XLOC_035908 | KREMEN1,RNU6-810P,ZNRF3,ZNRF3-IT1,chr22-38_28785274-29006793.1 | 22:28883591-29197572 |
| XLOC_035922 | MTMR3                                                          | 22:29883113-30177075 |

|             |                                   |                      |
|-------------|-----------------------------------|----------------------|
| XLOC_035939 | TCN2                              | 22:30576624-30630664 |
| XLOC_035957 | IGLCOR22-1,YWHAH                  | 22:31933520-32203477 |
| XLOC_035995 | TOM1                              | 22:35298837-35348069 |
| XLOC_035997 | HMOX1                             | 22:35380360-35394214 |
| XLOC_036024 | NCF4                              | 22:36847371-36878017 |
| XLOC_036025 | CSF2RB                            | 22:36913166-36940486 |
| XLOC_036044 | H1FO                              | 22:37805092-37807436 |
| XLOC_036066 | APOBEC3F,APOBEC3G                 | 22:39040603-39087743 |
| XLOC_036068 | RP4-742C19.12                     | 22:39091022-39092855 |
| XLOC_036079 | CACNA1I                           | 22:39570752-39689738 |
| XLOC_036082 | GRAP2                             | 22:39900959-39980267 |
| XLOC_036105 | TEF                               | 22:41367332-41399405 |
| XLOC_036116 | SREBF2                            | 22:41699498-41907308 |
| XLOC_036137 | TSPO                              | 22:43151513-43163250 |
| XLOC_036155 | ARHGAP8,PRR5,PRR5-ARHGAP8         | 22:44666740-44862788 |
| XLOC_036178 | GRAMD4                            | 22:46576011-46680516 |
| XLOC_036206 | PIM3                              | 22:49960434-49993894 |
| XLOC_036210 | PANX2                             | 22:50170695-50180294 |
| XLOC_036279 | CECR6                             | 22:17116298-17132104 |
| XLOC_036281 | CECR1                             | 22:17178789-17221989 |
| XLOC_036304 | PI4KAP1                           | 22:18527156-18577968 |
| XLOC_036322 | CLTCL1                            | 22:19179430-19291716 |
| XLOC_036330 | ARVCF                             | 22:19875516-20016808 |
| XLOC_036336 | RTN4R                             | 22:20241414-20283246 |
| XLOC_036374 | YPEL1                             | 22:21652269-21735834 |
| XLOC_036378 | PPM1F                             | 22:21919236-21982853 |
| XLOC_036504 | AC000041.8,AP1B1                  | 22:29327508-29423194 |
| XLOC_036519 | OSM                               | 22:30262828-30267401 |
| XLOC_036521 | GATSL3,RP1-130H16.18,TBC1D10<br>A | 22:30284928-30327046 |
| XLOC_036535 | SELM                              | 22:31104771-31120069 |
| XLOC_036542 | PIK3IP1                           | 22:31212203-31346232 |
| XLOC_036580 | TOM1                              | 22:35298837-35348069 |
| XLOC_036615 | IL2RB                             | 22:37125837-37199463 |
| XLOC_036617 | RP1-151B14.9,SSTR3                | 22:37204235-37220721 |
| XLOC_036654 | DNAL4,SUN2                        | 22:38705722-38794198 |
| XLOC_036656 | NPTXR                             | 22:38818451-38843982 |
| XLOC_036664 | CBX7,COX5BP7                      | 22:39120166-39152711 |
| XLOC_036665 | PDGFB                             | 22:39223358-39248586 |
| XLOC_036666 | RPL3,SNORD43,SNORD83B             | 22:39312881-39320389 |
| XLOC_036696 | RANGAP1                           | 22:41245573-41286251 |
| XLOC_036715 | NAGA                              | 22:41998724-42070879 |
| XLOC_036722 | NFAM1                             | 22:42159906-42432487 |
| XLOC_036726 | RNU6-513P,RRP7B                   | 22:42553616-42582525 |
| XLOC_036756 | LDOC1L                            | 22:44492571-44498298 |
| XLOC_036758 | PRR5                              | 22:44666740-44862788 |
| XLOC_036762 | KIAA0930                          | 22:45189962-45240954 |
| XLOC_036802 | Metazoa_SRP                       | 22:49845233-49850896 |
| XLOC_036805 | CITF22-49E9.3                     | 22:49932336-49935367 |
| XLOC_036806 | PIM3                              | 22:49960434-49993894 |

|             |                       |                       |
|-------------|-----------------------|-----------------------|
| XLOC_036809 | MLC1                  | 22:50059390-50085902  |
| XLOC_036813 | PLXNB2                | 22:50274874-50307783  |
| XLOC_036815 | SBF1                  | 22:50343303-50475069  |
| XLOC_036817 | ODF3B,SCO2,TYMP       | 22:50508215-50534821  |
| XLOC_036892 | CHL1                  | 3:195757-409417       |
| XLOC_036952 | IRAK2                 | 3:10164864-10243745   |
| XLOC_036960 | ATG7,VGLL4            | 3:11272308-11771350   |
| XLOC_036986 | SLC6A6                | 3:14402550-14542081   |
| XLOC_037012 | SATB1-AS1             | 3:17157161-18917692   |
| XLOC_037061 | RP11-222K16.2         | 3:27712197-27714559   |
| XLOC_037126 | ITGA9                 | 3:37452114-37861780   |
| XLOC_037128 | CTDSPL                | 3:37861959-37984469   |
| XLOC_037134 | MYD88                 | 3:38138078-38143153   |
| XLOC_037139 | ACVR2B                | 3:38451026-38493142   |
| XLOC_037152 | SLC25A38              | 3:39383080-39397351   |
| XLOC_037153 | RPSA,SNORA6,SNORA62   | 3:39406507-39412542   |
| XLOC_037163 | RP11-391M1.4,RPL14    | 3:40457291-40468587   |
| XLOC_037228 | CCR2                  | 3:46353716-46407059   |
| XLOC_037230 | CCRL2                 | 3:46407142-46412997   |
| XLOC_037256 | CAMP                  | 3:48223346-48225509   |
| XLOC_037301 | MAPKAPK3,RP11-804H8.6 | 3:50606031-51384268   |
| XLOC_037307 | GRM2                  | 3:51705728-51718613   |
| XLOC_037317 | ALAS1                 | 3:52198085-52214327   |
| XLOC_037324 | STAB1                 | 3:52494994-52771027   |
| XLOC_037341 | PRKCD                 | 3:53156008-53192717   |
| XLOC_037451 | -                     | 3:72738899-72744902   |
| XLOC_037582 | TMEM45A               | 3:100492618-100577445 |
| XLOC_037603 | NFKBIZ,NXPE3          | 3:101779194-101861139 |
| XLOC_037614 | ALCAM                 | 3:105366701-105576904 |
| XLOC_037630 | -                     | 3:108097942-108122934 |
| XLOC_037637 | TRAT1                 | 3:108822522-108861678 |
| XLOC_037651 | CD96                  | 3:111292718-111665962 |
| XLOC_037654 | PHLDB2,PLCXD2         | 3:111674385-111976517 |
| XLOC_037673 | SIDT1                 | 3:113532295-113631467 |
| XLOC_037677 | ATP6V1A               | 3:113746871-113812058 |
| XLOC_037685 | TIGIT                 | 3:114276912-115147319 |
| XLOC_037709 | ARHGAP31              | 3:119294149-119421207 |
| XLOC_037713 | ADPRH                 | 3:119579211-119590030 |
| XLOC_037745 | CD86                  | 3:122055268-122124001 |
| XLOC_037749 | CSTA                  | 3:122325243-122341972 |
| XLOC_037753 | PARP15                | 3:122577517-122639047 |
| XLOC_037758 | DIRC2,RP11-67L2.2     | 3:122794794-122892582 |
| XLOC_037804 | CHCHD6                | 3:126704219-126960488 |
| XLOC_037806 | PLXNA1                | 3:126983087-127037392 |
| XLOC_037821 | RAB7A                 | 3:128726121-128814798 |
| XLOC_037831 | -                     | 3:129184082-129202860 |
| XLOC_037834 | HMCES                 | 3:129278827-129306186 |
| XLOC_037863 | ACPP                  | 3:132317366-132375444 |
| XLOC_037866 | DNAJC13               | 3:132417525-132539032 |
| XLOC_037951 | CHST2,RP11-80H8.4     | 3:143117890-143150921 |

|             |                                      |                       |
|-------------|--------------------------------------|-----------------------|
| XLOC_037964 | PLSCR1                               | 3:146502358-146544968 |
| XLOC_037979 | GYG1                                 | 3:148991340-149102823 |
| XLOC_037988 | RNF13                                | 3:149761104-150225190 |
| XLOC_038015 | SUCNR1                               | 3:151733915-151928175 |
| XLOC_038032 | MME                                  | 3:155024123-155183729 |
| XLOC_038044 | TIPARP                               | 3:156671861-156706770 |
| XLOC_038055 | MLF1                                 | 3:158571162-158607252 |
| XLOC_038056 | GFM1,MFSD1,RP11-379F4.4              | 3:158644277-158831071 |
| XLOC_038200 | B3GNT5                               | 3:183178042-183428778 |
| XLOC_038258 | EIF4A2,SNORA4,SNORA63,SNORA81,SNORD2 | 3:186781779-186807058 |
| XLOC_038263 | ST6GAL1                              | 3:186930484-187078845 |
| XLOC_038357 | PAK2                                 | 3:196739842-196832647 |
| XLOC_038376 | FAM157A,RP11-694O4.1                 | 3:198151970-198190392 |
| XLOC_038396 | SUMF1                                | 3:3250686-4467281     |
| XLOC_038479 | WNT7A                                | 3:13816257-13880452   |
| XLOC_038566 | SLC4A7                               | 3:27372720-27484424   |
| XLOC_038571 | EOMES                                | 3:27715947-27722711   |
| XLOC_038595 | CMTM6                                | 3:32391586-32503408   |
| XLOC_038602 | GLB1,TMPPE                           | 3:32996607-33097230   |
| XLOC_038625 | LRRFIP2                              | 3:37052655-37183689   |
| XLOC_038647 | CSRNP1                               | 3:39141854-39154562   |
| XLOC_038649 | CX3CR1                               | 3:39232485-39281735   |
| XLOC_038719 | CCR1                                 | 3:46163603-46266706   |
| XLOC_038723 | LTF                                  | 3:46423648-46485234   |
| XLOC_038726 | ALS2CL                               | 3:46668996-46693704   |
| XLOC_038756 | PFKFB4,UCN2                          | 3:48517683-48563773   |
| XLOC_038779 | GPX1                                 | 3:49356891-49358600   |
| XLOC_038780 | AMT,NICN1,RHOA                       | 3:49359070-49429604   |
| XLOC_038802 | NPRL2,RASSF1,ZMYND10                 | 3:50329623-50504244   |
| XLOC_038804 | CACNA2D2                             | 3:50329623-50504244   |
| XLOC_038822 | ABHD14B,PCBP4,RP11-155D18.12         | 3:51955313-51989197   |
| XLOC_038826 | ALAS1                                | 3:52198085-52214327   |
| XLOC_038844 | TKT                                  | 3:53211813-53256069   |
| XLOC_038867 | ARHGEF3                              | 3:56722981-57080101   |
| XLOC_038877 | ARF4                                 | 3:57571347-57600927   |
| XLOC_038882 | DNASE1L3                             | 3:58192256-58214697   |
| XLOC_038886 | ACOX2                                | 3:58505135-58537319   |
| XLOC_038922 | LRIG1                                | 3:66133609-66501263   |
| XLOC_038932 | FRMD4B                               | 3:69169989-69542642   |
| XLOC_038945 | PROK2                                | 3:71770951-71785654   |
| XLOC_038947 | LINC00877                            | 3:72033019-72242565   |
| XLOC_039002 | GBE1                                 | 3:81489698-81762161   |
| XLOC_039059 | FILIP1L                              | 3:99817831-100179059  |
| XLOC_039074 | RPL24                                | 3:101681090-101686782 |
| XLOC_039084 | CBLB                                 | 3:105655460-105870680 |
| XLOC_039127 | GCSAM                                | 3:112086334-112133381 |
| XLOC_039134 | ATG3                                 | 3:112532501-112585577 |
| XLOC_039226 | HEG1                                 | 3:124965709-125055958 |
| XLOC_039233 | OSBPL11,Y_RNA                        | 3:125528127-125595755 |

|             |                      |                       |
|-------------|----------------------|-----------------------|
| XLOC_039368 | CLDN18,DZIP1L        | 3:137951457-138175109 |
| XLOC_039372 | CEP70                | 3:138494343-138594538 |
| XLOC_039374 | PIK3CB               | 3:138652698-138835003 |
| XLOC_039410 | TFDP2                | 3:141944338-142149544 |
| XLOC_039412 | GK5,RP11-485G4.2     | 3:142157331-142225609 |
| XLOC_039420 | PCOLCE2              | 3:142815921-142889236 |
| XLOC_039438 | PLSCR1,RP11-329N15.3 | 3:146502358-146544968 |
| XLOC_039486 | P2RY13               | 3:151085696-151458709 |
| XLOC_039541 | VEPH1                | 3:157143130-157533619 |
| XLOC_039598 | SERPINI2,WDR49       | 3:167441788-167653983 |
| XLOC_039603 | GOLIM4               | 3:168008676-168096059 |
| XLOC_039622 | EIF5A2               | 3:170888414-170908693 |
| XLOC_039626 | TNIK                 | 3:171054012-171460446 |
| XLOC_039629 | PLD1                 | 3:171600200-171810950 |
| XLOC_039637 | TNFSF10              | 3:172505507-172523507 |
| XLOC_039640 | NCEH1                | 3:172630248-172711218 |
| XLOC_039684 | GNB4,RP11-145M9.4    | 3:179347691-179451636 |
| XLOC_039716 | LAMP3                | 3:183122212-183163839 |
| XLOC_039752 | DGKG,ETV5            | 3:186046307-186362273 |
| XLOC_039771 | BCL6                 | 3:187698258-187745727 |
| XLOC_039823 | XXYLT1               | 3:195067569-195271327 |
| XLOC_039826 | ACAP2                | 3:195274691-195443078 |
| XLOC_039916 | -                    | 3:46416433-46418730   |
| XLOC_040024 | FGFRL1               | 4:1009923-1026899     |
| XLOC_040074 | D4S234E              | 4:4348139-4764361     |
| XLOC_040080 | STK32B               | 4:5051441-5500998     |
| XLOC_040086 | WFS1                 | 4:6269848-6303265     |
| XLOC_040089 | AC093323.3           | 4:6670724-6676047     |
| XLOC_040090 | S100P                | 4:6679327-6697170     |
| XLOC_040099 | SORCS2               | 4:7192537-7742836     |
| XLOC_040107 | SH3TC1               | 4:8182071-8243878     |
| XLOC_040189 | BST1,FAM200B         | 4:15603883-15739411   |
| XLOC_040198 | LAP3                 | 4:17577191-17614571   |
| XLOC_040244 | RBPJ                 | 4:26163454-26435288   |
| XLOC_040276 | DTHD1,RP11-431M7.2   | 4:36281608-36392410   |
| XLOC_040284 | PGM2,RP11-177C12.1   | 4:37826181-37876353   |
| XLOC_040288 | LINC01259            | 4:38279010-38523180   |
| XLOC_040295 | FAM114A1             | 4:38867676-38945739   |
| XLOC_040317 | RHOH                 | 4:40191052-40247732   |
| XLOC_040331 | LIMCH1               | 4:41359606-41700044   |
| XLOC_040369 | TXK                  | 4:48063154-48269864   |
| XLOC_040498 | UBA6-AS1             | 4:67701269-68129880   |
| XLOC_040552 | SLC4A4               | 4:71186688-71572087   |
| XLOC_040567 | CXCL8                | 4:73740505-73743716   |
| XLOC_040575 | EREG                 | 4:74365142-74388946   |
| XLOC_040576 | AREG                 | 4:74445133-74455009   |
| XLOC_040578 | PARM1                | 4:74933094-75050115   |
| XLOC_040591 | FAM47E,FAM47E-STBD1  | 4:76158736-76311599   |
| XLOC_040602 | SEPT11               | 4:76949700-77040384   |
| XLOC_040612 | ANXA3                | 4:78551518-78610451   |



|             |                       |                       |
|-------------|-----------------------|-----------------------|
| XLOC_040613 | LINC01094             | 4:78617515-78682847   |
| XLOC_040615 | BMP2K                 | 4:78776294-78939438   |
| XLOC_040648 | AGPAT9                | 4:83535761-83605875   |
| XLOC_040656 | ARHGAP24              | 4:85475113-86002811   |
| XLOC_040733 | DAPP1                 | 4:99816739-99870484   |
| XLOC_040767 | TET2                  | 4:105137279-105279816 |
| XLOC_040781 | SGMS2                 | 4:107824562-107978799 |
| XLOC_040785 | LEF1-AS1              | 4:108047544-108341108 |
| XLOC_040787 | RPL34                 | 4:108620461-108638681 |
| XLOC_040820 | C4orf32               | 4:112145396-112195256 |
| XLOC_040823 | ALPK1                 | 4:112274541-112442620 |
| XLOC_040864 | USP53                 | 4:119192772-119295517 |
| XLOC_040998 | SMAD1                 | 4:145481193-145559148 |
| XLOC_041051 | RP11-18H21.1          | 4:152100753-152120145 |
| XLOC_041067 | RP11-153M7.5,TLR2     | 4:153682715-153961936 |
| XLOC_041087 | GUCY1A3,RP11-588K22.2 | 4:155666710-155737062 |
| XLOC_041106 | RP11-597D13.9,TMEM144 | 4:158124473-158255411 |
| XLOC_041108 | RP11-597D13.7         | 4:158262788-158280553 |
| XLOC_041150 | KLHL2                 | 4:165070607-165323156 |
| XLOC_041187 | SAP30                 | 4:173363779-173377532 |
| XLOC_041207 | NEIL3                 | 4:177309835-177362943 |
| XLOC_041230 | STOX2                 | 4:183853430-184023526 |
| XLOC_041330 | SPON2,TMED11P         | 4:1113638-1208962     |
| XLOC_041357 | LRPAP1,RP11-529E10.6  | 4:3503596-3532559     |
| XLOC_041372 | LYAR                  | 4:4267700-4321786     |
| XLOC_041385 | JAKMIP1               | 4:6026198-6200591     |
| XLOC_041391 | MRFAP1L1              | 4:6707700-6709917     |
| XLOC_041400 | AFAP1                 | 4:7754089-7940296     |
| XLOC_041438 | CLNK                  | 4:10484856-10734856   |
| XLOC_041466 | FBXL5                 | 4:15603883-15739411   |
| XLOC_041470 | FGFBP2,PROM1          | 4:15960240-16084378   |
| XLOC_041474 | LDB2                  | 4:16400429-16898809   |
| XLOC_041494 | CDC42P6               | 4:22692913-22819575   |
| XLOC_041503 | CCDC149               | 4:24803655-24996149   |
| XLOC_041542 | ARAP2                 | 4:35948220-36274220   |
| XLOC_041547 | RELL1,RP11-36B15.1    | 4:37453940-37686407   |
| XLOC_041560 | TLR1,TLR6             | 4:38744128-38856845   |
| XLOC_041565 | RPL9                  | 4:39454123-39458948   |
| XLOC_041581 | RBM47                 | 4:40423198-40631067   |
| XLOC_041594 | RP11-457P14.6         | 4:41896823-41934707   |
| XLOC_041616 | RAC1P2                | 4:46723829-46724408   |
| XLOC_041623 | NFXL1,RP11-121C2.2    | 4:47839858-48040173   |
| XLOC_041625 | TEC,TXK               | 4:48063154-48269864   |
| XLOC_041631 | OCIAD2                | 4:48885018-48906937   |
| XLOC_041654 | SGCB                  | 4:52020705-52038482   |
| XLOC_041690 | HOPX                  | 4:56647987-56681899   |
| XLOC_041694 | SPINK2                | 4:56809859-56821742   |
| XLOC_041773 | SULT1B1               | 4:69717372-69787961   |
| XLOC_041777 | IGJ                   | 4:70430491-70686816   |
| XLOC_041800 | CXCL3                 | 4:74036588-74038807   |

|             |                                    |                       |
|-------------|------------------------------------|-----------------------|
| XLOC_041803 | CXCL2                              | 4:74097034-74099293   |
| XLOC_041826 | SCARB2                             | 4:76158736-76311599   |
| XLOC_041863 | RASGEF1B,RP11-689K5.3              | 4:81426392-82044244   |
| XLOC_041882 | HPSE                               | 4:83292460-83335153   |
| XLOC_041893 | WDFY3                              | 4:84669083-85011277   |
| XLOC_041909 | HSD17B11,HSD17B13,RP11-529H2<br>.2 | 4:87159936-87391386   |
| XLOC_041957 | TSPAN5                             | 4:98470202-98658653   |
| XLOC_042028 | PAPSS1                             | 4:107590275-107720452 |
| XLOC_042032 | LEF1                               | 4:108047544-108341108 |
| XLOC_042100 | SEC24D                             | 4:118722808-118838683 |
| XLOC_042124 | ANXA5                              | 4:121667954-121697113 |
| XLOC_042145 | ANKRD50                            | 4:124664051-124712732 |
| XLOC_042221 | SETD7                              | 4:139495940-139606699 |
| XLOC_042225 | MAML3                              | 4:139665681-140154184 |
| XLOC_042234 | TBC1D9                             | 4:140619825-140758766 |
| XLOC_042242 | INPP4B                             | 4:142023159-142847432 |
| XLOC_042267 | ZNF827                             | 4:145680203-145938693 |
| XLOC_042283 | NR3C2                              | 4:148078622-148445334 |
| XLOC_042292 | LRBA                               | 4:150264442-151015745 |
| XLOC_042339 | MAP9                               | 4:155276688-155381346 |
| XLOC_042367 | FAM198B                            | 4:158124473-158255411 |
| XLOC_042392 | MARCH1                             | 4:163494089-164384050 |
| XLOC_042419 | DDX60L                             | 4:168356628-169010278 |
| XLOC_042445 | HMGB2,RP11-798M19.3                | 4:173131927-173335125 |
| XLOC_042461 | HPGD                               | 4:174490176-174523154 |
| XLOC_042510 | CLDN22,CLDN24                      | 4:183097016-183342811 |
| XLOC_042528 | ACSL1                              | 4:184755512-184826818 |
| XLOC_042530 | RP11-701P16.5                      | 4:184843403-184855751 |
| XLOC_042602 | -                                  | 4:15762542-15764792   |
| XLOC_042678 | -                                  | 4:158259726-158262041 |
| XLOC_042760 | CTD-2044J15.2,SRD5A1               | 5:6633342-6679761     |
| XLOC_042821 | CTD-2165H16.3,FAM105A              | 5:14581773-14641018   |
| XLOC_042835 | BASP1                              | 5:17065597-17276843   |
| XLOC_042941 | RAI14                              | 5:34656236-34832627   |
| XLOC_042949 | SPEF2                              | 5:35617620-35827018   |
| XLOC_042950 | IL7R                               | 5:35852694-35885081   |
| XLOC_042957 | SLC1A3                             | 5:36606354-36725219   |
| XLOC_042990 | CARD6                              | 5:40841183-40860175   |
| XLOC_043053 | SNX18                              | 5:54517709-54554938   |
| XLOC_043058 | GZMK                               | 5:54977863-55049253   |
| XLOC_043063 | GZMA                               | 5:55102647-55110252   |
| XLOC_043072 | IL31RA                             | 5:55851378-55922853   |
| XLOC_043093 | GAPT                               | 5:58479644-58497246   |
| XLOC_043107 | ZSWIM6                             | 5:61332267-61546671   |
| XLOC_043115 | IPO11,KIF2A,LRRC70                 | 5:62306158-62629137   |
| XLOC_043167 | RP11-848G14.2,RP11-848G14.5        | 5:69607010-69637670   |
| XLOC_043203 | FCHO2                              | 5:72955205-73090522   |
| XLOC_043216 | ARHGEF28                           | 5:73626157-73941993   |
| XLOC_043221 | HEXB                               | 5:74627405-74867854   |

|             |                                     |                       |
|-------------|-------------------------------------|-----------------------|
| XLOC_043243 | F2R                                 | 5:76402482-76735781   |
| XLOC_043244 | F2RL1                               | 5:76818781-76835693   |
| XLOC_043283 | ZFYVE16                             | 5:80407632-80546912   |
| XLOC_043284 | FAM151B,RPL7P24                     | 5:80407632-80546912   |
| XLOC_043286 | RASGRF2                             | 5:80947696-81313297   |
| XLOC_043303 | VCAN                                | 5:83471375-83588645   |
| XLOC_043367 | ARSK                                | 5:95555073-95605255   |
| XLOC_043373 | AC008592.4,LINC01554                | 5:95829418-95860133   |
| XLOC_043456 | CAMK4                               | 5:111223652-112017309 |
| XLOC_043533 | CTB-36H16.2,SNX2                    | 5:122774982-122838178 |
| XLOC_043561 | LMNB1                               | 5:126776622-126837069 |
| XLOC_043588 | CDC42SE2                            | 5:131233022-131398802 |
| XLOC_043625 | TCF7                                | 5:134091625-134371047 |
| XLOC_043635 | JADE2                               | 5:134524311-134583295 |
| XLOC_043655 | TGFBI                               | 5:136028894-136063870 |
| XLOC_043679 | EGR1                                | 5:138465489-138469315 |
| XLOC_043682 | CTNNA1                              | 5:138610966-138935034 |
| XLOC_043703 | IGIP,PURA                           | 5:140072856-140129392 |
| XLOC_043705 | CYSTM1                              | 5:140174641-140303192 |
| XLOC_043760 | ARHGAP26                            | 5:142770375-143229011 |
| XLOC_043801 | ADRB2                               | 5:148825244-149063163 |
| XLOC_043815 | PPARGC1B                            | 5:149730290-149855022 |
| XLOC_043824 | NDST1                               | 5:150475530-150558211 |
| XLOC_043828 | SMIM3                               | 5:150777945-150796734 |
| XLOC_043834 | GM2A                                | 5:151163711-151303766 |
| XLOC_043837 | SLC36A1                             | 5:151437045-151497839 |
| XLOC_043873 | ITK                                 | 5:157080207-157255514 |
| XLOC_043874 | CYFIP2                              | 5:157260121-157576108 |
| XLOC_043907 | MIR146A                             | 5:160468267-160487426 |
| XLOC_043992 | CPEB4                               | 5:173888279-173961976 |
| XLOC_044012 | CTC-251I16.1,HRH2                   | 5:175657637-175710756 |
| XLOC_044057 | N4BP3                               | 5:178113442-178126995 |
| XLOC_044072 | ZNF354C                             | 5:179060377-179086270 |
| XLOC_044107 | BTNL9                               | 5:181040224-181061523 |
| XLOC_044115 | AC138035.2                          | 5:181306501-181324685 |
| XLOC_044132 | BRD9,CTD-2589H19.4,ZDHHC11,ZDHHC11B | 5:710359-919357       |
| XLOC_044149 | AC091849.1,RP11-43F13.1,SDHAP3      | 5:1567420-1634225     |
| XLOC_044233 | DAP                                 | 5:10679229-10770294   |
| XLOC_044245 | -                                   | 5:14564470-14573058   |
| XLOC_044250 | ANKH                                | 5:14661807-14871914   |
| XLOC_044274 | FTH1P10                             | 5:17353694-17354899   |
| XLOC_044395 | IL7R                                | 5:35852694-35885081   |
| XLOC_044485 | EMB                                 | 5:50337771-50443332   |
| XLOC_044514 | CTD-2313F11.1,ESM1                  | 5:54977863-55049253   |
| XLOC_044592 | CTD-2116N20.1                       | 5:65484341-65516599   |
| XLOC_044605 | CD180,CTD-2306M10.1                 | 5:67179206-67196820   |
| XLOC_044626 | CCDC125,CFL1P5                      | 5:69279316-69332852   |
| XLOC_044637 | RP11-1319K7.1                       | 5:70094658-70128434   |
| XLOC_044646 | NAIP                                | 5:70968482-71025114   |

|             |                           |                       |
|-------------|---------------------------|-----------------------|
| XLOC_044694 | GCNT4,LINC01336           | 5:75025193-75054103   |
| XLOC_044715 | S100Z                     | 5:76849907-76921848   |
| XLOC_044722 | AP3B1,CTD-2179L22.1       | 5:77991487-78294755   |
| XLOC_044726 | LHFPL2                    | 5:78485182-78770021   |
| XLOC_044729 | ARSB                      | 5:78776769-78986087   |
| XLOC_044734 | JMY                       | 5:78997605-79327394   |
| XLOC_044751 | ANKRD34B                  | 5:80556753-80570488   |
| XLOC_044776 | TMEM167A                  | 5:83052845-83353787   |
| XLOC_044811 | MEF2C                     | 5:88507545-89466398   |
| XLOC_044825 | LUCAT1,RP11-213H15.4      | 5:91295970-91314486   |
| XLOC_044843 | MCTP1                     | 5:94152965-95284575   |
| XLOC_044901 | ST8SIA4                   | 5:100806314-100942091 |
| XLOC_044979 | TICAM2,TMED7,TMED7-TICAM2 | 5:115573653-115632992 |
| XLOC_045033 | CEP120                    | 5:123344884-123423592 |
| XLOC_045073 | FBN2                      | 5:128257908-129033642 |
| XLOC_045089 | P4HA2                     | 5:132037322-132405223 |
| XLOC_045095 | KIF3A                     | 5:132688680-132737638 |
| XLOC_045098 | SHROOM1                   | 5:132822098-132830898 |
| XLOC_045113 | C5orf15                   | 5:133955501-133968787 |
| XLOC_045137 | H2AFY                     | 5:135027734-135401296 |
| XLOC_045138 | DCANP1,TIFAB              | 5:135444022-135458697 |
| XLOC_045157 | SPOCK1                    | 5:136975297-137598379 |
| XLOC_045173 | ETF1                      | 5:138506094-138543300 |
| XLOC_045197 | HBEGF                     | 5:140332842-140346636 |
| XLOC_045203 | CD14                      | 5:140618763-140633987 |
| XLOC_045228 | PCDH1                     | 5:141850771-141879246 |
| XLOC_045259 | PPP2R2B,RNA5SP196         | 5:146563225-147084784 |
| XLOC_045266 | JAKMIP2                   | 5:147585438-147782848 |
| XLOC_045298 | CSF1R                     | 5:149960686-150113372 |
| XLOC_045304 | RPS14                     | 5:150442818-150449756 |
| XLOC_045451 | SH3PXD2B                  | 5:172325180-172454523 |
| XLOC_045457 | DUSP1                     | 5:172574248-172778091 |
| XLOC_045498 | HK3                       | 5:176810476-176899666 |
| XLOC_045506 | F12                       | 5:177400102-177456286 |
| XLOC_045509 | DOK3                      | 5:177456607-177511274 |
| XLOC_045514 | FAM153A                   | 5:177682293-177794396 |
| XLOC_045551 | RNF130                    | 5:179911650-180072118 |
| XLOC_045564 | FLT4                      | 5:180601505-180649624 |
| XLOC_045575 | -                         | 5:181186711-181190336 |
| XLOC_045577 | CTC-338M12.1,TRIM7        | 5:181191881-181217852 |
| XLOC_045718 | SERPINB1                  | 6:2801444-2842368     |
| XLOC_045735 | FAM50B                    | 6:3831932-3855737     |
| XLOC_045762 | LY86                      | 6:6346464-6654985     |
| XLOC_045765 | RREB1                     | 6:7107596-7251980     |
| XLOC_045797 | TMEM170B                  | 6:11536991-11583524   |
| XLOC_045806 | RPL15P3                   | 6:12514109-12514724   |
| XLOC_045818 | CD83                      | 6:14117255-14136918   |
| XLOC_045823 | JARID2                    | 6:15245480-15522040   |
| XLOC_045848 | RNF144B                   | 6:18387230-18468874   |
| XLOC_045856 | E2F3                      | 6:20401905-20493719   |

|             |                                         |                       |
|-------------|-----------------------------------------|-----------------------|
| XLOC_045861 | SOX4                                    | 6:21592768-21598619   |
| XLOC_045931 | BTN3A2                                  | 6:26365158-26378682   |
| XLOC_045933 | BTN3A1                                  | 6:26401935-26415387   |
| XLOC_045935 | BTN2A1,BTN3A3                           | 6:26440226-26493769   |
| XLOC_046074 | DDR1,MIR4640                            | 6:30876420-30900901   |
| XLOC_046094 | HCP5,MICA                               | 6:31382809-31511124   |
| XLOC_046103 | TNF                                     | 6:31575478-31578336   |
| XLOC_046105 | AIF1                                    | 6:31615183-31617021   |
| XLOC_046120 | C2,CFB,XXbac-BPG116M5.17                | 6:31897784-31952084   |
| XLOC_046127 | EGFL8,PPT2,PPT2-EGFL8                   | 6:32148358-32178096   |
| XLOC_046137 | -                                       | 6:32480011-32481928   |
| XLOC_046167 | PHF1                                    | 6:33410398-33418317   |
| XLOC_046168 | MIR5004,SYNGAP1,ZBTB9                   | 6:33420069-33457611   |
| XLOC_046171 | ITPR3,MIR3934                           | 6:33620247-33711948   |
| XLOC_046180 | PACSIN1                                 | 6:34466060-34535231   |
| XLOC_046198 | RPL10A                                  | 6:35468407-35470785   |
| XLOC_046209 | MAPK13,MAPK14                           | 6:36027208-36145124   |
| XLOC_046211 | PNPLA1                                  | 6:36240803-36314220   |
| XLOC_046213 | KCTD20                                  | 6:36354410-36491232   |
| XLOC_046219 | CDKN1A                                  | 6:36676459-36687355   |
| XLOC_046220 | RAB44,RP3-431A14.4                      | 6:36697786-36737986   |
| XLOC_046223 | FGD2                                    | 6:37005626-37153393   |
| XLOC_046230 | RP1-153P14.5,RP1-153P14.7,RP1-153P14.8  | 6:37507347-37571588   |
| XLOC_046245 | DAAM2                                   | 6:39792365-39934551   |
| XLOC_046286 | PTK7                                    | 6:43076267-43161719   |
| XLOC_046305 | VEGFA                                   | 6:43770183-43786487   |
| XLOC_046313 | SLC29A1                                 | 6:44219504-44234358   |
| XLOC_046324 | RUNX2                                   | 6:44806759-45666820   |
| XLOC_046326 | ENPP4                                   | 6:46129975-46146699   |
| XLOC_046367 | TMEM14A                                 | 6:52671108-52686588   |
| XLOC_046369 | RN7SK                                   | 6:52995619-52995950   |
| XLOC_046417 | FKBP1C                                  | 6:63211445-63213024   |
| XLOC_046422 | PTP4A1                                  | 6:63521760-63583587   |
| XLOC_046454 | OGFRL1                                  | 6:71221456-71420769   |
| XLOC_046494 | MYO6                                    | 6:75749184-75919963   |
| XLOC_046531 | CYB5R4                                  | 6:83859642-83971383   |
| XLOC_046540 | NT5E                                    | 6:85449583-85495791   |
| XLOC_046556 | C6orf165,SLC35A1                        | 6:87407982-87512883   |
| XLOC_046581 | CASP8AP2                                | 6:89829892-89874436   |
| XLOC_046689 | FOXO3                                   | 6:108559783-108775655 |
| XLOC_046704 | FIG4,RP1-249I4.2                        | 6:109691274-109829368 |
| XLOC_046719 | SLC16A10                                | 6:111087502-111259034 |
| XLOC_046742 | MARCKS                                  | 6:113857361-113863471 |
| XLOC_046748 | DSE,RP1-93H18.1,RP1-93H18.7,RP1-93H18.7 | 6:116249960-116445076 |
| XLOC_046755 | KPNA5                                   | 6:116681095-116741893 |
| XLOC_046794 | SMPDL3A                                 | 6:122789048-122809720 |
| XLOC_046799 | RNF217                                  | 6:124909092-125092633 |
| XLOC_046806 | RP11-527F13.1,TRMT11                    | 6:125986402-126248048 |

|             |                            |                       |
|-------------|----------------------------|-----------------------|
| XLOC_046827 | LAMA2                      | 6:128883140-129516569 |
| XLOC_046836 | ARG1                       | 6:131572584-131628373 |
| XLOC_046860 | RPS12                      | 6:132814440-132847717 |
| XLOC_046884 | MYB                        | 6:135181299-135219173 |
| XLOC_046889 | PDE7B                      | 6:135851649-136225595 |
| XLOC_046904 | TNFAIP3                    | 6:137823672-137883312 |
| XLOC_046947 | STX11                      | 6:144147938-144191960 |
| XLOC_046957 | RAB32                      | 6:146543692-146554965 |
| XLOC_046966 | SASH1                      | 6:148237584-148552050 |
| XLOC_046970 | UST                        | 6:148746797-149077318 |
| XLOC_046977 | GINM1                      | 6:149566293-149592663 |
| XLOC_047082 | IGF2R,RP11-288H12.4        | 6:159969035-160158718 |
| XLOC_047145 | -                          | 6:170464605-170474167 |
| XLOC_047156 | EXOC2                      | 6:485015-693138       |
| XLOC_047172 | SERPINB1                   | 6:2801444-2842368     |
| XLOC_047175 | SERPINB9                   | 6:2885024-2903889     |
| XLOC_047216 | F13A1                      | 6:6144072-6321171     |
| XLOC_047289 | -                          | 6:17585289-17599036   |
| XLOC_047294 | KIF13A                     | 6:17759114-17987657   |
| XLOC_047380 | GUSBP2                     | 6:26826422-26956958   |
| XLOC_047389 | ZNF204P                    | 6:27357656-27403904   |
| XLOC_047491 | FLOT1                      | 6:30727708-30742869   |
| XLOC_047493 | IER3                       | 6:30742928-30744575   |
| XLOC_047533 | CLIC1,DDAH2                | 6:31727037-31739763   |
| XLOC_047581 | DAXX                       | 6:33318557-33329269   |
| XLOC_047623 | FKBP5                      | 6:35570087-35728583   |
| XLOC_047629 | SLC26A8                    | 6:35943513-36024868   |
| XLOC_047631 | RP1-179N16.3               | 6:36027208-36145124   |
| XLOC_047654 | CCDC167                    | 6:37482919-37499922   |
| XLOC_047670 | KCNK5                      | 6:39188972-39229450   |
| XLOC_047689 | RP1-229K20.5,TREM1,TREML3P | 6:41208592-41291474   |
| XLOC_047747 | ENPP5                      | 6:46159072-46170989   |
| XLOC_047751 | PLA2G7                     | 6:46652914-46735693   |
| XLOC_047771 | CRISP3                     | 6:49727375-49744437   |
| XLOC_047790 | MCM3                       | 6:52263888-52284881   |
| XLOC_047953 | ELOVL4                     | 6:79914811-79947580   |
| XLOC_047961 | FAM46A                     | 6:81491438-81752774   |
| XLOC_048023 | GABRR2,UBE2J1              | 6:89254478-89353161   |
| XLOC_048024 | RRAGD                      | 6:89364635-89412270   |
| XLOC_048094 | CD24                       | 6:106969830-106975627 |
| XLOC_048100 | RP1-47M23.3,SCML4          | 6:107695422-107824457 |
| XLOC_048106 | SNX3                       | 6:108211221-108261260 |
| XLOC_048125 | WASF1                      | 6:110099818-110180004 |
| XLOC_048145 | FYN                        | 6:111660331-111873630 |
| XLOC_048198 | MAN1A1                     | 6:119177208-119349861 |
| XLOC_048237 | THEMIS                     | 6:127700178-127952643 |
| XLOC_048254 | RP11-73O6.3,SAMD3          | 6:130013698-130443241 |
| XLOC_048270 | STX7                       | 6:132445297-132611185 |
| XLOC_048277 | VNN1                       | 6:132681589-132714049 |
| XLOC_048279 | VNN2                       | 6:132743869-132763483 |

|             |                      |                       |
|-------------|----------------------|-----------------------|
| XLOC_048290 | SGK1                 | 6:134169245-134318112 |
| XLOC_048326 | IFNGR1               | 6:137197483-137219449 |
| XLOC_048333 | PERP                 | 6:138088504-138107511 |
| XLOC_048360 | HIVEP2,RP11-439L18.2 | 6:142748442-142958052 |
| XLOC_048370 | PLAGL1               | 6:143940299-144064753 |
| XLOC_048438 | SYNE1                | 6:151656690-152637801 |
| XLOC_048487 | TAGAP                | 6:158948086-159065273 |
| XLOC_048494 | SOD2                 | 6:159669056-159798436 |
| XLOC_048501 | LPAL2                | 6:160348267-160520841 |
| XLOC_048575 | -                    | 6:170464605-170474167 |
| XLOC_048652 | -                    | 6:49718061-49719271   |
| XLOC_048684 | -                    | 6:119349927-119356978 |
| XLOC_048747 | FAM20C               | 7:182934-352156       |
| XLOC_048778 | AC004840.9,CHST12    | 7:2403451-2463073     |
| XLOC_048782 | TTYH3                | 7:2631940-2664802     |
| XLOC_048818 | ZNF853               | 7:6615616-6624290     |
| XLOC_048880 | AHR                  | 7:17279833-17346152   |
| XLOC_048921 | AC005082.12          | 7:23206012-23208045   |
| XLOC_048937 | MPP6                 | 7:24573267-24694275   |
| XLOC_048943 | -                    | 7:26101642-26126737   |
| XLOC_048946 | SNX10                | 7:26291891-26376701   |
| XLOC_048970 | CREB5                | 7:28299320-28826165   |
| XLOC_049014 | FKBP9                | 7:32957403-33007205   |
| XLOC_049040 | ANLN                 | 7:36324220-36724567   |
| XLOC_049136 | UPP1                 | 7:48070312-48108733   |
| XLOC_049137 | ABCA13               | 7:48171433-48647496   |
| XLOC_049332 | AUTS2                | 7:69598918-70793068   |
| XLOC_049379 | NCF1                 | 7:74773674-74791579   |
| XLOC_049406 | HSPB1                | 7:76302543-76304295   |
| XLOC_049431 | MAGI2-AS3            | 7:78017056-79471208   |
| XLOC_049436 | CD36                 | 7:80330191-80679835   |
| XLOC_049462 | ADAM22               | 7:87934142-88202956   |
| XLOC_049482 | FZD1                 | 7:91264363-91271326   |
| XLOC_049542 | LMTK2                | 7:98106870-98209633   |
| XLOC_049544 | BRI3                 | 7:98211426-98401068   |
| XLOC_049578 | PVRIG,STAG3          | 7:100177562-100272865 |
| XLOC_049586 | AGFG2                | 7:100539188-100568219 |
| XLOC_049613 | SH2B2                | 7:102284618-102321711 |
| XLOC_049653 | CDHR3                | 7:105876766-106034061 |
| XLOC_049683 | LRRN3                | 7:110663050-111562517 |
| XLOC_049710 | CAPZA2               | 7:116811069-116922049 |
| XLOC_049798 | IRF5                 | 7:128937268-129055203 |
| XLOC_049810 | SMKR1                | 7:129502478-129512932 |
| XLOC_049811 | -                    | 7:129525463-129533825 |
| XLOC_049864 | NUP205               | 7:135557918-135648849 |
| XLOC_049905 | TBXAS1               | 7:139561569-140063721 |
| XLOC_049930 | MGAM                 | 7:141704286-142107008 |
| XLOC_049935 | TRBV1                | 7:142298796-142299897 |
| XLOC_049936 | TRBV2                | 7:142299999-142301439 |
| XLOC_049937 | TRBV3-1              | 7:142308201-142309587 |

|             |                                                                                                                                  |                       |
|-------------|----------------------------------------------------------------------------------------------------------------------------------|-----------------------|
| XLOC_049938 | TRBV4-1                                                                                                                          | 7:142313183-142313666 |
| XLOC_049939 | TRBV5-1                                                                                                                          | 7:142320315-142321629 |
| XLOC_049940 | TRBV6-1                                                                                                                          | 7:142328296-142328786 |
| XLOC_049942 | TRBV4-2                                                                                                                          | 7:142345420-142345985 |
| XLOC_049943 | -                                                                                                                                | 7:142348776-142350068 |
| XLOC_049944 | -                                                                                                                                | 7:142350456-142353406 |
| XLOC_049951 | TRBV9                                                                                                                            | 7:142391890-142392412 |
| XLOC_049957 | TRBV6-5                                                                                                                          | 7:142435822-142452425 |
| XLOC_049960 | TRBV6-6                                                                                                                          | 7:142469192-142470387 |
| XLOC_049964 | TRBV5-6                                                                                                                          | 7:142499130-142501103 |
| XLOC_049968 | TRBV7-9                                                                                                                          | 7:142529289-142529762 |
| XLOC_049970 | TRBV10-3                                                                                                                         | 7:142543004-142544926 |
| XLOC_049972 | TRBV12-3                                                                                                                         | 7:142560422-142560931 |
| XLOC_049973 | TRBV12-4                                                                                                                         | 7:142563425-142564266 |
| XLOC_049975 | TRBV14                                                                                                                           | 7:142587867-142588359 |
| XLOC_049976 | TRBV15                                                                                                                           | 7:142592927-142593473 |
| XLOC_049979 | TRBV18,TRBV19                                                                                                                    | 7:142615552-142621378 |
| XLOC_049980 | TRBV20-1                                                                                                                         | 7:142624560-142627421 |
| XLOC_049983 | TRBV23-1                                                                                                                         | 7:142645960-142646467 |
| XLOC_049986 | PGBD4P1,TRBC2,TRBJ2-1,TRBJ2-2,TRBJ2-2P,TRBJ2-3,TRBJ2-5,TRBJ2-6,TRBJ2-7,TRBV25-1,TRBV27,TRBV28                                    | 7:142670669-142803938 |
| XLOC_050008 | ZYX                                                                                                                              | 7:143379340-143529691 |
| XLOC_050077 | RP4-800G7.2,ZNF783                                                                                                               | 7:149261997-149297312 |
| XLOC_050087 | ATP6V0E2                                                                                                                         | 7:149867696-150076655 |
| XLOC_050096 | GIMAP7                                                                                                                           | 7:150514829-150521073 |
| XLOC_050102 | GIMAP1,GIMAP5,RP5-1051J4.4                                                                                                       | 7:150716359-150751528 |
| XLOC_050145 | -                                                                                                                                | 7:155263322-155266978 |
| XLOC_050173 | AC011899.9,RP11-452C13.1                                                                                                         | 7:157539055-158587788 |
| XLOC_050183 | -                                                                                                                                | 7:13594-36896         |
| XLOC_050198 | MICALL2                                                                                                                          | 7:1428464-1459518     |
| XLOC_050218 | CARD11                                                                                                                           | 7:2904846-3043979     |
| XLOC_050220 | -                                                                                                                                | 7:3093515-3118095     |
| XLOC_050240 | AC006483.1,ACTB                                                                                                                  | 7:5525056-5563784     |
| XLOC_050291 | ICA1                                                                                                                             | 7:8113183-8344516     |
| XLOC_050381 | DFNA5                                                                                                                            | 7:24698352-24758113   |
| XLOC_050382 | OSBPL3                                                                                                                           | 7:24796538-24981634   |
| XLOC_050400 | SKAP2                                                                                                                            | 7:26667061-26995239   |
| XLOC_050421 | CREB5                                                                                                                            | 7:28299320-28826165   |
| XLOC_050423 | CPVL                                                                                                                             | 7:28979966-29563670   |
| XLOC_050484 | AOAH                                                                                                                             | 7:36324220-36724567   |
| XLOC_050493 | AMPH,RP11-121A8.1,TRGC1,TRGC2,TRGJ1,TRGJ2,TRGJP,TRGJP1,TRGJP2,TRGV1,TRGV2,TRGV3,TRGV4,TRGV5,TRGV5P,TRGV6,TRGV7,TRGV8,TRGV9,TRGVA | 7:38239518-38631567   |
| XLOC_050519 | INHBA                                                                                                                            | 7:41667167-41779388   |
| XLOC_050561 | IGFBP3                                                                                                                           | 7:45912244-45921874   |
| XLOC_050569 | TNS3                                                                                                                             | 7:47275149-47582558   |



|             |                                    |                       |
|-------------|------------------------------------|-----------------------|
| XLOC_050586 | FIGNL1                             | 7:50436114-50565457   |
| XLOC_050588 | GRB10                              | 7:50590062-50793462   |
| XLOC_050737 | GUSB                               | 7:65960683-65982314   |
| XLOC_050824 | NCF1                               | 7:74773674-74791579   |
| XLOC_050830 | NCF1C                              | 7:75156638-75172044   |
| XLOC_050841 | HIP1                               | 7:75533084-75739088   |
| XLOC_050852 | YWHAG                              | 7:76326793-76359031   |
| XLOC_050866 | FGL2                               | 7:76959801-77416646   |
| XLOC_050881 | AC073850.6                         | 7:80330191-80679835   |
| XLOC_050882 | CD36                               | 7:80330191-80679835   |
| XLOC_050883 | SEMA3C                             | 7:80742537-80922359   |
| XLOC_050890 | HGF                                | 7:81699005-81770487   |
| XLOC_050908 | KIAA1324L                          | 7:86876905-87059699   |
| XLOC_050912 | TP53TG1                            | 7:87324690-87345550   |
| XLOC_050914 | ABCB1                              | 7:87502928-87832296   |
| XLOC_050915 | SLC25A40                           | 7:87833556-87909541   |
| XLOC_050917 | CTB-167B5.2,STEAP4                 | 7:88203521-88307019   |
| XLOC_050965 | PDK4                               | 7:95583498-95619940   |
| XLOC_051078 | DPY19L2P2                          | 7:103175132-103280416 |
| XLOC_051095 | NAMPT                              | 7:106248284-106286359 |
| XLOC_051112 | NRCAM                              | 7:108147622-108456717 |
| XLOC_051125 | DOCK4                              | 7:111726109-112206463 |
| XLOC_051149 | TFEC                               | 7:115935147-116159896 |
| XLOC_051197 | AASS                               | 7:122073546-122144280 |
| XLOC_051234 | PRRT4                              | 7:128350324-128362099 |
| XLOC_051288 | PLXNA4                             | 7:132123331-132648688 |
| XLOC_051299 | AKR1B1                             | 7:134442349-134459284 |
| XLOC_051360 | KIAA1147,RP5-894A10.2,RP5-894A10.6 | 7:141529202-141702163 |
| XLOC_051368 | CLEC5A                             | 7:141704286-142107008 |
| XLOC_051380 | TRBC2                              | 7:142670669-142803938 |
| XLOC_051402 | RP11-61L23.2                       | 7:143761789-143836933 |
| XLOC_051429 | PDIA4                              | 7:149003053-149028641 |
| XLOC_051437 | ZNF777                             | 7:149431362-149461123 |
| XLOC_051440 | ZNF467                             | 7:149764171-149833979 |
| XLOC_051455 | GIMAP6                             | 7:150624011-150673590 |
| XLOC_051458 | -                                  | 7:150759372-150781181 |
| XLOC_051459 | TMEM176B                           | 7:150791284-150805120 |
| XLOC_051461 | ATG9B                              | 7:150990994-151024499 |
| XLOC_051470 | SMARCD3                            | 7:151231637-151277896 |
| XLOC_051556 | INMT                               | 7:30651942-30925516   |
| XLOC_051641 | -                                  | 7:150757051-150759283 |
| XLOC_051656 | ARHGEF10                           | 8:1823975-1958641     |
| XLOC_051658 | KBTBD11                            | 8:1971396-2006936     |
| XLOC_051661 | MYOM2                              | 8:2045039-2491307     |
| XLOC_051663 | MYOM2                              | 8:2045039-2491307     |
| XLOC_051727 | -                                  | 8:8920093-8927548     |
| XLOC_051741 | MSRA                               | 8:10054267-10428954   |
| XLOC_051841 | LPL                                | 8:19901716-19967258   |
| XLOC_051843 | ATP6V1B2,RNU6-892P                 | 8:20197341-20233342   |

|             |                           |                       |
|-------------|---------------------------|-----------------------|
| XLOC_051865 | SLC39A14                  | 8:22367248-22434129   |
| XLOC_051867 | PPP3CC,SORBS3             | 8:22440818-22575788   |
| XLOC_051875 | TNFRSF10C                 | 8:23084354-23122083   |
| XLOC_051895 | DOCK5                     | 8:25184672-25418082   |
| XLOC_051902 | BNIP3L                    | 8:26379258-26514092   |
| XLOC_051905 | DPYSL2                    | 8:26514274-26658178   |
| XLOC_051914 | EPHX2                     | 8:27490778-27615031   |
| XLOC_051970 | NRG1,RP11-1002K11.1       | 8:31639385-32767959   |
| XLOC_052022 | -                         | 8:38215350-38224765   |
| XLOC_052033 | ADAM9                     | 8:38988807-39105144   |
| XLOC_052166 | LYN,RP11-446E9.2          | 8:55876698-56025350   |
| XLOC_052185 | FAM110B                   | 8:57994508-58204279   |
| XLOC_052188 | SDCBP                     | 8:58552923-58661826   |
| XLOC_052241 | C8orf44,C8orf44-SGK3,SGK3 | 8:66667454-66862022   |
| XLOC_052295 | LY96                      | 8:73991204-74037298   |
| XLOC_052317 | IL7,ZC2HC1A               | 8:78666046-78941769   |
| XLOC_052375 | CPNE3                     | 8:86333273-86765023   |
| XLOC_052385 | RIPK2                     | 8:89609408-89791298   |
| XLOC_052438 | SDC2                      | 8:96493350-96611780   |
| XLOC_052439 | CPQ                       | 8:96645226-97149654   |
| XLOC_052502 | KB-1507C5.4               | 8:102978784-103002424 |
| XLOC_052504 | ATP6V1C1                  | 8:103020186-103073364 |
| XLOC_052509 | BAALC                     | 8:103121031-103333114 |
| XLOC_052591 | ZHX2                      | 8:122781393-122974512 |
| XLOC_052611 | FAM91A1                   | 8:123768442-123815523 |
| XLOC_052630 | TRIB1                     | 8:125430047-125438416 |
| XLOC_052709 | DENND3                    | 8:141117277-141196050 |
| XLOC_052715 | PTP4A3                    | 8:141389938-141432598 |
| XLOC_052737 | LY6E                      | 8:142981737-143032629 |
| XLOC_052745 | RHPN1                     | 8:143368815-143384220 |
| XLOC_052759 | CTD-3065J16.6,SPATC1      | 8:143856161-144063832 |
| XLOC_052844 | DEFA4                     | 8:6934847-6938368     |
| XLOC_052850 | DEFA1B,DEFA3              | 8:6996765-7018301     |
| XLOC_052892 | ALG1L13P                  | 8:8228594-8245441     |
| XLOC_052893 | SGK223                    | 8:8317729-8386498     |
| XLOC_052937 | CTSB                      | 8:11842065-11869448   |
| XLOC_052991 | MSR1                      | 8:16107773-16567490   |
| XLOC_053001 | MTUS1                     | 8:17576432-17800917   |
| XLOC_053004 | ASAHI                     | 8:18034099-18096394   |
| XLOC_053029 | REEP4                     | 8:22138019-22141955   |
| XLOC_053084 | CLU,MIR6843               | 8:27490778-27615031   |
| XLOC_053092 | NUGGC                     | 8:28020876-28084110   |
| XLOC_053122 | GSR                       | 8:30678060-30727926   |
| XLOC_053170 | RAB11FIP1                 | 8:37858617-37899467   |
| XLOC_053207 | ZMAT4                     | 8:40530428-40897833   |
| XLOC_053265 | CEBPB                     | 8:47260574-47739086   |
| XLOC_053306 | LYPLA1                    | 8:54046366-54102017   |
| XLOC_053321 | RPS20,SNORD54             | 8:56066740-56074581   |
| XLOC_053325 | PLAG1                     | 8:56160903-56211327   |
| XLOC_053331 | LINC00968                 | 8:56436673-56559823   |

|             |                           |                       |
|-------------|---------------------------|-----------------------|
| XLOC_053346 | TOX                       | 8:58797386-59121346   |
| XLOC_053364 | ASPH                      | 8:61057157-61714647   |
| XLOC_053387 | RP11-1D12.2               | 8:64800623-64817590   |
| XLOC_053396 | MYBL1                     | 8:66562174-66614961   |
| XLOC_053400 | SNHG6,SNORD87             | 8:66870748-66926398   |
| XLOC_053455 | RP11-463D19.2,STAU2,UBE2W | 8:73420003-73878910   |
| XLOC_053582 | TMEM55A                   | 8:90990706-91041064   |
| XLOC_053596 | TRIQQ                     | 8:92882983-93017673   |
| XLOC_053611 | FSBP,RAD54B,RP11-267M23.1 | 8:94371959-94475113   |
| XLOC_053644 | RPL30                     | 8:97868839-98047353   |
| XLOC_053651 | STK3                      | 8:98401402-98942827   |
| XLOC_053698 | NCALD                     | 8:101686542-102124907 |
| XLOC_053700 | RRM2B                     | 8:102204501-102239311 |
| XLOC_053704 | KLF10                     | 8:102646461-102655973 |
| XLOC_053707 | AZIN1                     | 8:102826356-102977876 |
| XLOC_053774 | TRPS1                     | 8:115408432-115809673 |
| XLOC_053781 | EXT1                      | 8:117794489-118111899 |
| XLOC_053845 | -                         | 8:125859607-125877548 |
| XLOC_053846 | LINC00861,SOD1P3          | 8:125916485-125955412 |
| XLOC_053860 | -                         | 8:127663183-127674890 |
| XLOC_053875 | FAM49B                    | 8:129832300-130017129 |
| XLOC_053879 | ASAP1                     | 8:130052103-130443660 |
| XLOC_053893 | SLA                       | 8:132866957-133134903 |
| XLOC_054070 | -                         | 8:89380821-89380982   |
| XLOC_054144 | JAK2                      | 9:4984456-5129917     |
| XLOC_054224 | CNTLN                     | 9:17134981-17503923   |
| XLOC_054322 | ANXA2P2                   | 9:33624273-33625293   |
| XLOC_054333 | UBE2R2                    | 9:33750465-33920404   |
| XLOC_054349 | GALT,IL11RA               | 9:34638132-34682302   |
| XLOC_054361 | RUSC2                     | 9:35489855-35563899   |
| XLOC_054367 | CCDC107                   | 9:35658265-35681159   |
| XLOC_054383 | GLIPR2                    | 9:36136314-36164531   |
| XLOC_054412 | SNX18P3                   | 9:38540561-38624990   |
| XLOC_054600 | ANXA1                     | 9:73151756-73170393   |
| XLOC_054618 | GCNT1                     | 9:76419849-76906087   |
| XLOC_054630 | VPS13A                    | 9:77176755-77421541   |
| XLOC_054636 | CEP78                     | 9:78234588-78293301   |
| XLOC_054694 | DAPK1                     | 9:87497227-87708754   |
| XLOC_054697 | CTSL                      | 9:87725518-87731393   |
| XLOC_054714 | C9orf47,S1PR3             | 9:88990862-89005011   |
| XLOC_054721 | -                         | 9:89526943-89577548   |
| XLOC_054722 | GADD45G                   | 9:89605012-89606790   |
| XLOC_054730 | SYK                       | 9:90801497-90902297   |
| XLOC_054757 | C9orf89                   | 9:93096167-93113283   |
| XLOC_054772 | HIATL1                    | 9:94374334-94461042   |
| XLOC_054803 | HABP4                     | 9:96450171-96619830   |
| XLOC_054832 | GALNT12                   | 9:98807637-98872415   |
| XLOC_054876 | NIPSNAP3A,NIPSNAP3B       | 9:104747668-104777764 |
| XLOC_054879 | SLC44A1                   | 9:105244515-105439171 |
| XLOC_054896 | RAD23B                    | 9:107283136-107332399 |

|             |                             |                       |
|-------------|-----------------------------|-----------------------|
| XLOC_054918 | DNAJC25,DNAJC25-GNG10,GNG10 | 9:111631304-111670246 |
| XLOC_054921 | UGCG                        | 9:111896765-111935369 |
| XLOC_054930 | RP11-408O19.5,SNX30         | 9:112750753-112899831 |
| XLOC_054932 | SLC31A2                     | 9:113150646-113221459 |
| XLOC_054933 | SLC31A1                     | 9:113221561-113293978 |
| XLOC_054937 | RGS3                        | 9:113444730-113597743 |
| XLOC_054961 | TRIM32                      | 9:116424985-117415070 |
| XLOC_054966 | TLR4                        | 9:117704202-117769444 |
| XLOC_054980 | GSN                         | 9:121074204-121332843 |
| XLOC_055018 | NEK6                        | 9:124257605-124415478 |
| XLOC_055049 | ZBTB34                      | 9:126860629-126885878 |
| XLOC_055057 | -                           | 9:127579283-127592083 |
| XLOC_055059 | C9orf117,TTC16              | 9:127612264-127736622 |
| XLOC_055066 | LCN2                        | 9:128149070-128153474 |
| XLOC_055076 | CERCAM                      | 9:128411750-128437497 |
| XLOC_055083 | SPTAN1                      | 9:128552460-128656787 |
| XLOC_055091 | LRRC8A                      | 9:128818473-128918066 |
| XLOC_055099 | -                           | 9:129236190-129239050 |
| XLOC_055103 | C9orf106                    | 9:129321015-129327203 |
| XLOC_055108 | LINC00963,RP11-492E3.51     | 9:129483450-129513686 |
| XLOC_055115 | USP20                       | 9:129827289-129882271 |
| XLOC_055155 | EEF1A1P5                    | 9:133019485-133020874 |
| XLOC_055175 | RXRA                        | 9:134317097-134441499 |
| XLOC_055221 | LCN12                       | 9:136791322-136957733 |
| XLOC_055223 | LCNL1,PTGDS,RP11-229P13.19  | 9:136974856-136986410 |
| XLOC_055224 | C9orf142                    | 9:136992370-136994027 |
| XLOC_055242 | TOR4A                       | 9:137277748-137282641 |
| XLOC_055253 | FAM157B                     | 9:138216186-138252994 |
| XLOC_055262 | CBWD1                       | 9:119810-179147       |
| XLOC_055289 | SPATA6L                     | 9:4490443-4666788     |
| XLOC_055312 | RANBP6                      | 9:6010677-6015663     |
| XLOC_055353 | TTC39B                      | 9:15163621-15307360   |
| XLOC_055355 | PSIP1                       | 9:15422703-15511328   |
| XLOC_055361 | BNC2                        | 9:16409502-16871007   |
| XLOC_055373 | PLIN2                       | 9:19108374-19149290   |
| XLOC_055438 | C9orf72,MOB3B               | 9:27325208-27573866   |
| XLOC_055441 | LINGO2                      | 9:27947518-29213876   |
| XLOC_055473 | AQP3                        | 9:33441153-33447611   |
| XLOC_055520 | FAM214B                     | 9:35104111-35116341   |
| XLOC_055526 | SIT1                        | 9:35649294-35650950   |
| XLOC_055527 | RMRP                        | 9:35657750-35658018   |
| XLOC_055529 | TPM2                        | 9:35681991-35691152   |
| XLOC_055571 | CNTNAP3,RP11-290L7.3        | 9:39071986-39288478   |
| XLOC_055658 | RNA5SP283                   | 9:62798834-62813501   |
| XLOC_055750 | LINC01504,ZFAND5            | 9:72305228-72365402   |
| XLOC_055779 | GNAQ                        | 9:77716086-78031458   |
| XLOC_055805 | FRMD3                       | 9:83242989-83538546   |
| XLOC_055813 | SLC28A3                     | 9:84275456-84368739   |
| XLOC_055815 | AGTPBP1                     | 9:85541302-85881460   |

|             |                                                       |                        |
|-------------|-------------------------------------------------------|------------------------|
| XLOC_055837 | CDK20                                                 | 9:87966155-87974766    |
| XLOC_055863 | RP11-305L7.1,RP11-305L7.3,RP11-367F23.1,RP11-367F23.2 | 9:90955882-91182762    |
| XLOC_055868 | NFIL3                                                 | 9:91409039-91424642    |
| XLOC_055891 | NINJ1                                                 | 9:93121488-93134288    |
| XLOC_055904 | FBP1                                                  | 9:94603132-94640249    |
| XLOC_055912 | PTCH1                                                 | 9:95442979-95517057    |
| XLOC_055944 | HEMGN                                                 | 9:97926790-97944856    |
| XLOC_055947 | CORO2A                                                | 9:98120974-98192679    |
| XLOC_055948 | TBC1D2                                                | 9:98198983-98255830    |
| XLOC_055973 | MRPL50                                                | 9:101387632-101398645  |
| XLOC_055994 | ABCA1                                                 | 9:104780740-104928892  |
| XLOC_056012 | KLF4                                                  | 9:107484667-107752466  |
| XLOC_056041 | TXN                                                   | 9:110243810-110256640  |
| XLOC_056047 | LPAR1                                                 | 9:110668770-111039090  |
| XLOC_056075 | FKBP15                                                | 9:113150646-113221459  |
| XLOC_056117 | MEGF9                                                 | 9:120600812-120714977  |
| XLOC_056126 | STOM                                                  | 9:121338987-121370304  |
| XLOC_056162 | NR6A1                                                 | 9:124517274-124772927  |
| XLOC_056164 | RPL35                                                 | 9:124853416-124862012  |
| XLOC_056188 | FAM129B                                               | 9:127505298-127579030  |
| XLOC_056195 | AK1,RP11-203J24.9,ST6GALNAC4,ST6GALNAC6               | 9:127864857-127917065  |
| XLOC_056199 | FAM102A                                               | 9:127934502-127981066  |
| XLOC_056227 | LINC01503                                             | 9:129330656-129359538  |
| XLOC_056236 | PTGES                                                 | 9:129738330-129777367  |
| XLOC_056250 | FAM78A                                                | 9:131257851-131278011  |
| XLOC_056268 | RALGDS                                                | 9:133097718-133149334  |
| XLOC_056269 | GBGT1                                                 | 9:133149983-133163951  |
| XLOC_056277 | SLC2A6                                                | 9:133459964-133479517  |
| XLOC_056281 | DBH-AS1,SARDH                                         | 9:133636359-133739955  |
| XLOC_056282 | VAV2                                                  | 9:133761893-133992826  |
| XLOC_056289 | FCN1                                                  | 9:134641773-134918129  |
| XLOC_056312 | NACC2                                                 | 9:136006331-136095297  |
| XLOC_056323 | INPP5E                                                | 9:136428582-136439892  |
| XLOC_056330 | AGPAT2                                                | 9:136673142-136687467  |
| XLOC_056335 | LCN8                                                  | 9:136754384-136758543  |
| XLOC_056344 | CLIC3                                                 | 9:136994633-136996916  |
| XLOC_056345 | ABCA2,FUT7,NPDC1,RP11-229P13.27                       | 9:137007226-137046218  |
| XLOC_056347 | SAPCD2                                                | 9:137057662-137071092  |
| XLOC_056363 | MIR7114,NSMF,PNPLA7                                   | 9:137447328-137550852  |
| XLOC_056366 | ZMYND19                                               | 9:137582078-137590490  |
| XLOC_056401 | -                                                     | 9:41241310-41242507    |
| XLOC_056409 | -                                                     | 9:62818034-62819171    |
| XLOC_060335 | -                                                     | KI270745.1:21762-22985 |
| XLOC_060398 | CLCN4                                                 | X:10156636-10237662    |
| XLOC_060410 | TLR7                                                  | X:12866969-12890531    |
| XLOC_060411 | TLR8                                                  | X:12902816-12925987    |
| XLOC_060429 | MOSPD2                                                | X:14873265-14923663    |

|             |                                   |                       |
|-------------|-----------------------------------|-----------------------|
| XLOC_060430 | BMX                               | X:15384798-15556529   |
| XLOC_060469 | PHEX                              | X:22032319-22252442   |
| XLOC_060486 | SAT1                              | X:23783065-23786545   |
| XLOC_060537 | GK                                | X:30653358-30733160   |
| XLOC_060576 | CYBB                              | X:37349274-38688920   |
| XLOC_060598 | ATP6AP2                           | X:40580907-40606674   |
| XLOC_060640 | RP2                               | X:46836797-46899703   |
| XLOC_060649 | USP11                             | X:47232689-47248328   |
| XLOC_060655 | TIMP1                             | X:47557224-47619853   |
| XLOC_060694 | SUV39H1                           | X:48695553-48737163   |
| XLOC_060710 | PLP2                              | X:49171487-49186528   |
| XLOC_060785 | TSPYL2                            | X:53081164-53088540   |
| XLOC_060813 | MAGEH1                            | X:55452104-55453566   |
| XLOC_060851 | MIR223                            | X:65923534-66040125   |
| XLOC_060886 | DLG3                              | X:70444860-70505490   |
| XLOC_060905 | NHSL2,RP11-262D11.1,RP11-262D11.2 | X:72069671-72161750   |
| XLOC_060921 | CHIC1                             | X:73563145-73687111   |
| XLOC_060959 | MAGEE1                            | X:76427680-76431353   |
| XLOC_060969 | PGK1                              | X:78065187-78139713   |
| XLOC_060974 | GPR174                            | X:79144396-79175417   |
| XLOC_060978 | -                                 | X:79444389-79457154   |
| XLOC_060989 | SH3BGRL                           | X:81113700-81405628   |
| XLOC_061046 | DIAPH2                            | X:96684621-97642589   |
| XLOC_061092 | GPRASP1                           | X:102599167-102717733 |
| XLOC_061146 | FRMPD3                            | X:107449976-107605420 |
| XLOC_061147 | PRPS1                             | X:107628423-107651032 |
| XLOC_061151 | MID2                              | X:107825730-107935980 |
| XLOC_061153 | VSIG1                             | X:108018859-108079210 |
| XLOC_061228 | IL13RA1                           | X:118727571-118794605 |
| XLOC_061315 | XPNPEP2                           | X:129738973-129769625 |
| XLOC_061360 | SMIM10                            | X:134990937-134992473 |
| XLOC_061380 | FHL1                              | X:136147399-136211359 |
| XLOC_061389 | CD40LG                            | X:136647895-136662068 |
| XLOC_061459 | AFF2                              | X:148500618-149000663 |
| XLOC_061484 | HMGB3                             | X:150980508-150990775 |
| XLOC_061508 | ZNF185                            | X:152914441-152973480 |
| XLOC_061518 | ZNF275                            | X:153334154-153360110 |
| XLOC_061544 | TKTL1                             | X:154257537-154330363 |
| XLOC_061590 | P2RY8                             | X:1454037-1537749     |
| XLOC_061664 | GPX1P1                            | X:13377187-13419593   |
| XLOC_061686 | AP1S2                             | X:15789806-15855891   |
| XLOC_061777 | CXorf21                           | X:30553222-30578295   |
| XLOC_061783 | DMD                               | X:31097676-33339441   |
| XLOC_061847 | EFHC2                             | X:44146862-44343907   |
| XLOC_061856 | MIR221,MIR222,MIR222HG            | X:45745210-45770274   |
| XLOC_061888 | CFP                               | X:47621572-47630781   |
| XLOC_061909 | SLC38A5                           | X:48458536-48470256   |
| XLOC_061920 | PIM2                              | X:48913092-48919566   |
| XLOC_061923 | TFE3                              | X:49028718-49043486   |

|             |                |                       |
|-------------|----------------|-----------------------|
| XLOC_062035 | ARHGEF9        | X:63634966-63809274   |
| XLOC_062054 | VSIG4          | X:65923534-66040125   |
| XLOC_062067 | PJA1           | X:69160814-69165793   |
| XLOC_062094 | CXorf65,IL2RG  | X:71095873-71114013   |
| XLOC_062106 | CXCR3          | X:71615915-71618885   |
| XLOC_062180 | ITM2A          | X:79360382-79367667   |
| XLOC_062229 | EIF4A1P10      | X:91779260-92623230   |
| XLOC_062235 | NAP1L3         | X:93670929-93673568   |
| XLOC_062272 | BTK,TIMM8A     | X:101341458-101390796 |
| XLOC_062289 | BEX5           | X:102153704-102156057 |
| XLOC_062306 | BEX2           | X:103309345-103311046 |
| XLOC_062330 | MORC4          | X:106802679-107000244 |
| XLOC_062347 | ACSL4,KCNE1L   | X:109623699-109734139 |
| XLOC_062424 | LAMP2          | X:120425965-120469407 |
| XLOC_062612 | LDOC1          | X:141175744-141177125 |
| XLOC_062624 | SLITRK4        | X:143622789-143635777 |
| XLOC_062713 | PDZD4          | X:153802165-153830661 |
| XLOC_062716 | RENBP          | X:153935262-153944700 |
| XLOC_062735 | G6PD           | X:154531341-154567967 |
| XLOC_062743 | MPP1           | X:154778683-154821007 |
| XLOC_062752 | RAB39B         | X:155258240-155264589 |
| XLOC_062778 | -              | X:12927273-12930183   |
| XLOC_062796 | -              | X:30608027-30611046   |
| XLOC_062801 | -              | X:39178402-39180490   |
| XLOC_062837 | -              | X:74571960-74573754   |
| XLOC_062895 | LINC00278      | Y:2934405-3200160     |
| XLOC_062920 | PRKY,RNU6-941P | Y:7273694-7382117     |

---

*Supplemental Table S4.* List of 27 differentially expressed transcripts and their corresponding genes in the patients with HBV-ACLF compared with those with CHB.

| Isoform ID     | Gene ID     | Gene Name     | TSS group ID | Nearest_ref_ID  | Locus                  | Length |
|----------------|-------------|---------------|--------------|-----------------|------------------------|--------|
| TCONS_00014582 | XLOC_002891 | SDHB          | TSS7459      | ENST00000375499 | 1:17018721-17054170    | 1153   |
| TCONS_00015513 | XLOC_003054 | PTAFR         | TSS7950      | ENST00000539896 | 1:28147165-28234402    | 3975   |
| TCONS_00020279 | XLOC_004017 | CH17-385C13.2 | TSS10353     | ENST00000618406 | 1:146312887-146370251  | 9698   |
| TCONS_00042970 | XLOC_009130 | ATM           | TSS22382     | ENST00000452508 | 11:108151494-108467531 | 12954  |
| TCONS_00044024 | XLOC_009279 | CRTAM         | TSS22907     | ENST00000227348 | 11:122838383-122872639 | 2469   |
| TCONS_00058643 | XLOC_012022 | RP11-693J15.5 | TSS30208     | ENST00000504409 | 12:92420093-92492091   | 10626  |
| TCONS_00062349 | XLOC_012657 | CLEC2B        | TSS32048     | ENST00000538152 | 12:9827309-9870830     | 27398  |
| TCONS_00102641 | XLOC_020945 | RPL13         | TSS53093     | ENST00000567815 | 16:89560468-89597246   | 712    |
| TCONS_00136668 | XLOC_026940 | LRP3          | TSS70319     | ENST00000253193 | 19:33177602-33225850   | 3807   |
| TCONS_00137320 | XLOC_027009 | CAPNS1        | TSS70590     | ENST00000588815 | 19:36139573-36150741   | 1471   |
| TCONS_00138530 | XLOC_027144 | RPS19         | TSS71144     | ENST00000221975 | 19:41859698-41872926   | 500    |
| TCONS_00147596 | XLOC_028409 | MAP4K1        | TSS75043     | ENST00000396857 | 19:38587640-38618882   | 2653   |



|                |             |               |           |                 |                       |       |
|----------------|-------------|---------------|-----------|-----------------|-----------------------|-------|
| TCONS_00170726 | XLOC_032760 | RP11-378A13.2 | TSS86676  | ENST00000608367 | 2:218381687-218406424 | 24465 |
| TCONS_00181187 | XLOC_035353 | TMEM50B       | TSS92268  | ENST00000420455 | 21:33402895-33480011  | 12947 |
| TCONS_00183517 | XLOC_035885 | MIAT          | TSS93496  | ENST00000620145 | 22:26646427-26921033  | 10069 |
| TCONS_00184629 | XLOC_036064 | APOBEC3A      | TSS94011  | ENST00000402255 | 22:38952455-38998209  | 6406  |
| TCONS_00194486 | XLOC_037859 | NUDT16        | TSS98913  | ENST00000521288 | 3:131381670-131389623 | 6108  |
| TCONS_00198534 | XLOC_038620 | TRANK1        | TSS101048 | ENST00000429976 | 3:36819095-36945057   | 10481 |
| TCONS_00215933 | XLOC_042316 | TMEM154       | TSS110109 | ENST00000304385 | 4:152617478-152680165 | 10698 |
| TCONS_00235621 | XLOC_046948 | UTRN          | TSS120597 | ENST00000367545 | 6:144284836-144853034 | 12425 |
| TCONS_00246968 | XLOC_049519 | AC002451.3    | TSS126630 | ENST00000432265 | 7:95583498-95619940   | 20175 |
| TCONS_00251229 | XLOC_050363 | TOMM7         | TSS128884 | ENST00000358435 | 7:22812627-22822852   | 778   |
| TCONS_00258384 | XLOC_051885 | SLC25A37      | TSS132581 | ENST00000518881 | 8:23528596-23575645   | 7198  |
| TCONS_00259677 | XLOC_052186 | UBXN2B        | TSS133322 | ENST00000399598 | 8:58411241-58452145   | 5068  |
| TCONS_00261421 | XLOC_052634 | RNU6-442P     | TSS134324 | ENST00000383968 | 8:125895805-125909245 | 13440 |
| TCONS_00266684 | XLOC_053851 | FAM84B        | TSS137105 | ENST00000304916 | 8:126552441-127021014 | 5404  |
| TCONS_00273384 | XLOC_055383 | MLLT3         | TSS140735 | ENST00000380338 | 9:20341664-20622543   | 6772  |

---

*Supplemental Table S5.* List of the top 10 upregulated and downregulated transcripts (P<0.0001) and their corresponding genes in the patients with HBV-ACLF compared with those with CHB.

| Isoform ID     | Gene Name | Fold change_ log2 (ACLF/CHB) |      |
|----------------|-----------|------------------------------|------|
|                |           | Isoform                      | Gene |
| TCONS_00035981 | NA        | NA                           | NA   |
| TCONS_00243180 | NA        | NA                           | NA   |
| TCONS_00208306 | CXCL8     | 6.9                          | 5.8  |
| TCONS_00051341 | MMP8      | 6.9                          | 6.5  |
| TCONS_00138664 | CD177     | 6.4                          | 6.5  |
| TCONS_00199080 | LTF       | 5.7                          | 5.7  |
| TCONS_00132595 | PRTN3     | 5.7                          | 5.7  |
| TCONS_00081046 | CTSG      | 5.7                          | 5.5  |
| TCONS_00271603 | LCN2      | 5.4                          | 5.3  |
| TCONS_00174008 | BPI       | 5.3                          | 5.3  |
| TCONS_00074560 | NA        | NA                           | NA   |
| TCONS_00017527 | SLC1A7    | -3.8                         | -3.9 |
| TCONS_00236471 | NA        | -3.7                         | -3.2 |
| TCONS_00211564 | SPON2     | -3.5                         | -3.2 |
| TCONS_00294225 | TKTL1     | -3.3                         | -2.5 |
| TCONS_00015345 | ZNF683    | -3.2                         | -3.0 |
| TCONS_00155289 | GNLY      | -3.1                         | -2.7 |
| TCONS_00008906 | FCRL6     | -3.1                         | -2.3 |
| TCONS_00098313 | SBK1      | -3.1                         | -2.7 |
| TCONS_00100183 | GPR56     | -3.1                         | -3.2 |
